# Supplementary material for: A Review on Empirical Studies in Explainable Artificial Intelligence
Source: Research Square preprint supplement (doi:10.21203/rs.3.rs-7924782/v1), 2025-11-25
Supplement: Supplementary file 1 [file 1dd33399011d903fd283f831.xlsx]

## Sheet: clustered results on properties
article title	A Review on Empirical Studies in Explainable Artificial Intelligence	Corresponding author	Tobias Jahn						Information extraction
journal name	Artificial Intelligence Review	Affiliation	Institute for Databases and Information Systems, Ulm University, Germany						Study informaton						Constructs
authors	Tobias Jahn, Philipp Hühn, and Manfred Reichert	e-mail address	tobias.jahn@uni-ulm.de												Objective Trust			Subjective Trust								objective Unterstanding								Subjective Understanding												Satisfaction
Author	Title	DOI	Url	Screening Phase	Notes	Extraction phase	filter for unique papers	result (sig, tend, no)	Further Context	data	control	observed XAI	user group	# participants	WOA (weight of advice)	persuasive power/ implicit trust/ behavioural trust	appropriate trust/ trust calibration	Agreement	Confidence	deceptive	wary	convincingness (subjective)	Reliance	global trust (usually trust)	local Trust	Predictability score	Prediction Accuracy (predict AI outcome) / Intuitiveness	Task Reflection	Relative difference	Reconstruction Score (measuring cognitive load)	objective transparency	learning effect (difference in task performance per time step)	objective Understanding	"help to comprehend"	consent	prediction confidence	system causability scale (SCS)	transparency	completeness	detail understanding (local)	system understanding (global)	learning (subjective)	subjective understanding	comprehensibility	observability	Frustration	Explanation Satisfaction Scale	overall evaluation	perceived Goodness of explanations
Adhikari, Ajaya; Tax, David M. J.; Satta, Riccardo; Faeth, Matthias	LEAFAGE: Example-based and Feature importance-based Explanations for Black-box ML models	10.1109/FUZZ-IEEE.2019.8858846	https://ieeexplore.ieee.org/abstract/document/8858846?casa_token=7h1bQPTGJH8AAAAA:pfDMF3xa5o7I3-NdiJNYxx1V8DB9OoVzpS6C6FazcxRi0cqdrSqeOuUuzuzhqBagGqQv3FrrXyo	include		include	yes	yes	house price prediction	tabular data	no explanation	feature importance	lay users	114					min *+												min *-							min *+
Cruz-Filipe, Luís; Kostopoulou, Sofia; Montesi, Fabrizio; Vistrup, Jonas	$$\mu $$XL: Explainable Lead Generation with Microservices and Hypothetical Answers	10.1007/s00607-024-01321-x	https://link.springer.com/10.1007/978-3-031-46235-1_1	include		exclude	yes
Tran, Tanya C.; Neasloss, Douglas; Bhattacharyya, Jonaki; Ban, Natalie C.; Olive, Andrea	“Borders don’t protect areas, people do”: insights from the development of an Indigenous Protected and Conserved Area in Kitasoo/Xai’xais Nation Territory	https://doi.org/10.1139/facets-2020-0041	https://www.sciencedirect.com/science/article/pii/S2371167120000848	exclude			yes
Weitz, Katharina, Schiller, Dominik, Schlagowski, Ruben, Huber, Tobias, André, Elisabeth	“Let me explain!”: exploring the potential of virtual agents in explainable AI interaction design	10.1007/s12193-020-00332-0	https://link.springer.com/article/10.1007/s12193-020-00332-0	include		exclude			speech recognition	image data (generated from voice data=	LIME + textual information	LIME + spoken information	domain experts	30																											(+)
Weitz, Katharina, Schiller, Dominik, Schlagowski, Ruben, Huber, Tobias, André, Elisabeth	“Let me explain!”: exploring the potential of virtual agents in explainable AI interaction design	10.1007/s12193-020-00332-0	https://link.springer.com/article/10.1007/s12193-020-00332-0	include		exclude			speech recognition	image data (generated from voice data=	LIME + textual information	LIME + spoken information + agent visualisation	domain experts	30																											(+)
Weitz, Katharina, Schiller, Dominik, Schlagowski, Ruben, Huber, Tobias, André, Elisabeth	“Let me explain!”: exploring the potential of virtual agents in explainable AI interaction design	10.1007/s12193-020-00332-0	https://link.springer.com/article/10.1007/s12193-020-00332-0	include		exclude			speech recognition	image data (generated from voice data=	LIME + spoken information	LIME + spoken information + agent visualisation	domain experts	30																											(-)
Adhikari, Ajaya; Tax, David M. J.; Satta, Riccardo; Faeth, Matthias	LEAFAGE: Example-based and Feature importance-based Explanations for Black-box ML models	10.1109/FUZZ-IEEE.2019.8858846	https://ieeexplore.ieee.org/abstract/document/8858846?casa_token=7h1bQPTGJH8AAAAA:pfDMF3xa5o7I3-NdiJNYxx1V8DB9OoVzpS6C6FazcxRi0cqdrSqeOuUuzuzhqBagGqQv3FrrXyo	include		include		yes	house price prediction	tabular data	feature importance	example-based	lay users	114					min *+												min *+							min *+
Adhikari, Ajaya; Tax, David M. J.; Satta, Riccardo; Faeth, Matthias	LEAFAGE: Example-based and Feature importance-based Explanations for Black-box ML models	10.1109/FUZZ-IEEE.2019.8858846	https://ieeexplore.ieee.org/abstract/document/8858846?casa_token=7h1bQPTGJH8AAAAA:pfDMF3xa5o7I3-NdiJNYxx1V8DB9OoVzpS6C6FazcxRi0cqdrSqeOuUuzuzhqBagGqQv3FrrXyo	include		include		yes	house price prediction	tabular data	no explanation	example-based	lay users	114					min *+																			min *+
Adhikari, Ajaya; Tax, David M. J.; Satta, Riccardo; Faeth, Matthias	LEAFAGE: Example-based and Feature importance-based Explanations for Black-box ML models	10.1109/FUZZ-IEEE.2019.8858846	https://ieeexplore.ieee.org/abstract/document/8858846?casa_token=7h1bQPTGJH8AAAAA:pfDMF3xa5o7I3-NdiJNYxx1V8DB9OoVzpS6C6FazcxRi0cqdrSqeOuUuzuzhqBagGqQv3FrrXyo	include		include		yes	house price prediction	tabular data	feature importance	Leafage (combination of both)	lay users	114					min *+												min *+							min *+
Riveiro, Maria; Thill, Serge	“That's (not) the output I expected!” On the role of end user expectations in creating explanations of AI systems	https://doi.org/10.1016/j.artint.2021.103507	https://www.sciencedirect.com/science/article/pii/S0004370221000588	include		exclude	yes		text classification	text classification	counterfactual (correct prediction)	factual (correct prediction)	lay users	181																									*+	*+	*+
Balzan, Francesco; Zanellati, Andrea; Zingaro, Stefano P.; Gabbrielli, Maurizio	A 2-Step Methodology for XAI in Education	10.1007/978-3-031-74627-7_6	https://link.springer.com/10.1007/978-3-031-74627-7_6	exclude			yes
Coma-Puig, Bernat, Calvo, Albert, Carmona, Josep, Gavaldà, Ricard	A case study of improving a non-technical losses detection system through explainability	10.1007/s10618-023-00927-7	https://link.springer.com/article/10.1007/s10618-023-00927-7	exclude			yes
Tsiakmaki, Maria; Ragos, Omiros	A Case Study of Interpretable Counterfactual Explanations for the Task of Predicting Student Academic Performance	10.1109/CSCC53858.2021.00029	https://ieeexplore.ieee.org/abstract/document/9668661?casa_token=ktuGtld-mUkAAAAA:oId3z4LTNYJZxZyiyd3vFOukwOkYtg1U-l35MhZRMKgeXMH3DyCOrrOCo_zp6m5lo6yOjSgZ6A	include		exclude	yes
Antoniadi, Anna Markella; Galvin, Miriam; Heverin, Mark; Wei, Lan; Hardiman, Orla; Mooney, Catherine	A Clinical Decision Support System for the Prediction of Quality of Life in ALS.	10.3390/jpm12030435	https://www.mdpi.com/2075-4426/12/3/435	include		exclude	yes
Vardhan, N. Jai; Chandana, Daggupati; Dheepak Raaj, R; Shanmukhi, Sudireddy; Radhakrishnan, Anisha	A Comparative Study of Hyperparameter Tuning in Deep Learning Models using Bayesian Optimization and XAI	10.1109/ICCCNT61001.2024.10725868	https://ieeexplore.ieee.org/abstract/document/10725868?casa_token=wYSrtKQDR0kAAAAA:gUTI6cun6eubbt9o6dft5zAgnX4WPCr7x9V3qMa_Bu-5N3KOWtpZ3lbfAXhqYfXZHibzrRmz5w	exclude			yes
Burgos, David; Morshed, Ahsan; Rashid, MD Mamunur; Mandala, Satria	A Comparison of Machine Learning Models to Deep Learning Models for Cancer Image Classification and Explainability of Classification	10.1109/ICoDSA62899.2024.10651790	https://ieeexplore.ieee.org/abstract/document/10651790?casa_token=4rU4M5ViD-kAAAAA:nwRgGRMsxNGBPsfL0_21e-PhTICKGQq_z8A_RPEQLL3xFxQcZKATpgons-bPsUEPm8afNohYxw	exclude	no user study		yes
Brotto Rebuli, Karina; Giacobini, Mario; Silva, Sara; Vanneschi, Leonardo	A Comparison of Structural Complexity Metrics for Explainable Genetic Programming	10.1145/3583133.3590595	https://doi.org/10.1145/3583133.3590595	exclude			yes
Ivaturi, Praharsh; Gadaleta, Matteo; Pandey, Amitabh C.; Pazzani, Michael; Steinhubl, Steven R.; Quer, Giorgio	A Comprehensive Explanation Framework for Biomedical Time Series Classification	10.1109/JBHI.2021.3060997	https://ieeexplore.ieee.org/abstract/document/9360451?casa_token=ztmy6jhsG-kAAAAA:6dk3Wio_S3Oqzok-6C0ASTftToQ24P2NZwMIfg8daND0nw5fo9Fe357LfVwCzZ3paC6vS-4IPQ	exclude			yes
Alvarez-Garcia, Miguel; Ibar-Alonso, Raquel; Arenas-Parra, Mar	A comprehensive framework for explainable cluster analysis	https://doi.org/10.1016/j.ins.2024.120282	https://www.sciencedirect.com/science/article/pii/S0020025524001956	exclude			yes
Bosscher, Benjamin C. D. De; Ziabari, Seyed Sahand Mohammadi; Sharpanskykh, Alexei	A comprehensive study of agent-based airport terminal operations using surrogate modeling and simulation	https://doi.org/10.1016/j.simpat.2023.102811	https://www.sciencedirect.com/science/article/pii/S1569190X23000886	exclude			yes
Mansouri, Taha; Vadera, Sunil	A Deep Explainable Model for Fault Prediction Using IoT Sensors	10.1109/ACCESS.2022.3184693	https://ieeexplore.ieee.org/abstract/document/9801817	exclude			yes
Chesñevar, Carlos Iván; González, María Paula; Maguitman, Ana; Estevez, Elsa	A first approach towards integrating computational argumentation in cognitive cities	10.1145/3428502.3428506	https://doi.org/10.1145/3428502.3428506	exclude			yes
Yang, Xin; Jin, Jie; Yang, Qiaolei; Shen, Xueling; Chen, Xin	A framework for structured semantic representation capable of active sensing and interpretable inference: A cancer prognostic analysis case study	https://doi.org/10.1016/j.compbiomed.2023.107475	https://www.sciencedirect.com/science/article/pii/S001048252300940X	exclude			yes
Yang, Xin; Jin, Jie; Yang, Qiaolei; Shen, Xueling; Chen, Xin	A framework for structured semantic representation capable of active sensing and interpretable inference: A cancer prognostic analysis case study.	10.1016/j.compbiomed.2023.107475	https://www.sciencedirect.com/science/article/abs/pii/S001048252300940X	exclude			yes
Buzcu, Berk, Pannatier, Yvan, Aydoğan, Reyhan, Ignaz Schumacher, Michael, Calbimonte, Jean-Paul, Calvaresi, Davide	A Framework for Explainable Multi-purpose Virtual Assistants: A Nutrition-Focused Case Study	10.1007/978-3-031-70074-3_4	https://link.springer.com/chapter/10.1007/978-3-031-70074-3_4	include		exclude	yes
Casalino, Gabriella; Castellano, Giovanna; Mitri, Daniele Di; Kaczmarek-Majer, Katarzyna; Zaza, Gianluca	A Human-centric Approach to Explain Evolving Data: A Case Study on Education	10.1109/EAIS58494.2024.10569098	https://ieeexplore.ieee.org/abstract/document/10569098?casa_token=UB_9gTdgnIAAAAAA:NcvXxSs2f06i9e-wAq3j_-DTi41fC8uaIgz06zFgSepkc9GYwjI_mqadSgzIt6VrvdtsLEsrNVM	include		exclude	yes
Berno, Michele; Canil, Marco; Chiarello, Nicola; Piazzon, Luca; Berti, Fabio; Ferrari, Francesca; Zaupa, Alessandro; Ferro, Nicola; Rossi, Michele; Susto, Gian Antonio	A Machine Learning-based Approach for Advanced Monitoring of Automated Equipment for the Entertainment Industry	10.1109/MetroInd4.0IoT51437.2021.9488481	https://ieeexplore.ieee.org/abstract/document/9488481	exclude			yes
Michalakopoulos, Vasilis; Sarmas, Elissaios; Papias, Ioannis; Skaloumpakas, Panagiotis; Marinakis, Vangelis; Doukas, Haris	A machine learning-based framework for clustering residential electricity load profiles to enhance demand response programs	https://doi.org/10.1016/j.apenergy.2024.122943	https://www.sciencedirect.com/science/article/pii/S030626192400326X	exclude			yes
Spanoudakis, Nikolaos I.; Krinakis, Panteleimon; Kolokotsa, Dionysia	A Methodology for Applying Decision Policies into Smart Buildings with the use of Computational Argumentation and IoT Technologies	10.1109/EEITE61750.2024.10654451	https://ieeexplore.ieee.org/document/10654451	exclude			yes
Hendawi, Rasha; Li, Juan; Roy, Souradip	A Mobile App That Addresses Interpretability Challenges in Machine Learning–Based Diabetes Predictions: Survey-Based User Study	https://doi.org/10.2196/50328	https://www.sciencedirect.com/science/article/pii/S2561326X23005322	include		exclude	yes
Hendawi, Rasha; Li, Juan; Roy, Souradip	A Mobile App That Addresses Interpretability Challenges in Machine Learning-Based Diabetes Predictions: Survey-Based User Study.	10.2196/50328	https://pubmed.ncbi.nlm.nih.gov/37955948/	include		exclude
Zorrilla, Asier López; Torres, M. Inés	A Multilingual Neural Coaching Model with Enhanced Long-term Dialogue Structure	10.1145/3487066	https://doi.org/10.1145/3487066	include		exclude	yes
Brand, Erik; Roitero, Kevin; Soprano, Michael; Rahimi, Afshin; Demartini, Gianluca	A Neural Model to Jointly Predict and Explain Truthfulness of Statements	10.1145/3546917	https://doi.org/10.1145/3546917	include		exclude	yes	yes	NLP	Natural Language	no explanation	E-BART	lay users	no info
Song, Di; Yao, Jincao; Jiang, Yitao; Shi, Siyuan; Cui, Chen; Wang, Liping; Wang, Lijing; Wu, Huaiyu; Tian, Hongtian; Ye, Xiuqin; Ou, Di; Li, Wei; Feng, Na; Pan, Weiyun; Song, Mei; Xu, Jinfeng; Xu, Dong; Wu, Linghu; Dong, Fajin	A new xAI framework with feature explainability for tumors decision-making in Ultrasound data: comparing with Grad-CAM	https://doi.org/10.1016/j.cmpb.2023.107527	https://www.sciencedirect.com/science/article/pii/S016926072300192X	include		exclude	yes
Song, Di; Yao, Jincao; Jiang, Yitao; Shi, Siyuan; Cui, Chen; Wang, Liping; Wang, Lijing; Wu, Huaiyu; Tian, Hongtian; Ye, Xiuqin; Ou, Di; Li, Wei; Feng, Na; Pan, Weiyun; Song, Mei; Xu, Jinfeng; Xu, Dong; Wu, Linghu; Dong, Fajin	A new xAI framework with feature explainability for tumors decision-making in Ultrasound data: comparing with Grad-CAM.	10.1016/j.cmpb.2023.107527	https://www.sciencedirect.com/science/article/abs/pii/S016926072300192X	include		exclude
Pintelas, Emmanuel, Liaskos, Meletis, Livieris, Ioannis E., Kotsiantis, Sotiris, Pintelas, Panagiotis	A novel explainable image classification framework: case study on skin cancer and plant disease prediction	10.1007/s00521-021-06141-0	https://link.springer.com/article/10.1007/s00521-021-06141-0	exclude			yes
Hossain, Md Maruf; Ahmed, Md Mahfuz; Nafi, Abdullah Al Nomaan; Islam, Md Rakibul; Ali, Md Shahin; Haque, Jahurul; Miah, Md Sipon; Rahman, Md Mahbubur; Islam, Md Khairul	A novel hybrid ViT-LSTM model with explainable AI for brain stroke detection and classification in CT images: A case study of Rajshahi region	https://doi.org/10.1016/j.compbiomed.2025.109711	https://www.sciencedirect.com/science/article/pii/S0010482525000617	exclude			yes
Pradeep, Preeja; Caro-Martínez, Marta; Wijekoon, Anjana	A practical exploration of the convergence of Case-Based Reasoning and Explainable Artificial Intelligence	https://doi.org/10.1016/j.eswa.2024.124733	https://www.sciencedirect.com/science/article/pii/S0957417424016002	include		exclude	yes
Fazzinga, Bettina; Galassi, Andrea; Torroni, Paolo	A privacy-preserving dialogue system based on argumentation	https://doi.org/10.1016/j.iswa.2022.200113	https://www.sciencedirect.com/science/article/pii/S2667305322000515	include		exclude	yes
Barda, Amie J., Horvat, Christopher M., Hochheiser, Harry	A qualitative research framework for the design of user-centered displays of explanations for machine learning model predictions in healthcare	10.1186/s12911-020-01276-x	https://link.springer.com/article/10.1186/s12911-020-01276-x	exclude			yes
Pavelski, Lucas Marcondes; Braga, Rodrigo de Souza	A real-world case study for automated ticket team assignment using natural language processing and explainable models	10.1145/3551349.3561164	https://doi.org/10.1145/3551349.3561164	include		exclude	yes
Ordibazar, Amir Hossein, Hussain, Omar, Saberi, Morteza	A Recommender System and Risk Mitigation Strategy for Supply Chain Management Using the Counterfactual Explanation Algorithm	10.1007/978-3-031-14135-5_8	https://link.springer.com/chapter/10.1007/978-3-031-14135-5_8	exclude			yes
Moraliyage, Harsha; Dahanayake, Sanoshi; De Silva, Daswin; Mills, Nishan; Rathnayaka, Prabod; Nguyen, Su; Alahakoon, Damminda; Jennings, Andrew	A Robust Artificial Intelligence Approach with Explainability for Measurement and Verification of Energy Efficient Infrastructure for Net Zero Carbon Emissions.	10.3390/s22239503	https://www.mdpi.com/1424-8220/22/23/9503	include		exclude	yes
Ahmad, Ijaz; Zhu, Mingxing; Li, Guanglin; javeed, Danish; Kumar, Prabhat; Chen, Shixiong	A Secure and Interpretable AI for Smart Healthcare System: A Case Study on Epilepsy Diagnosis Using EEG Signals.	10.1109/JBHI.2024.3366341	https://ieeexplore.ieee.org/document/10476674	exclude			yes
Han, Xiaoxuan; Jin, Yanlin; Wu, Ge; Guo, Sixin; Liu, Tingjian	A self-attention-embedded deep learning model for phasor measurement unit-based post-fault transient stability prediction	10.1109/ACFPE56003.2022.9952178	https://ieeexplore.ieee.org/abstract/document/9952178?casa_token=6QP_7N2x3NMAAAAA:GkODXyTNb8PhW2PVFPHwEhw05u3BXLc2GGUOsBp-msIWxUgAelz02ax3mEUVcwm-bvBQg4jJUA	exclude			yes
Yeo, Guo Feng Anders; Hudson, Irene; Akman, David; Chan, Jeffrey	A Simple Framework for XAI Comparisons with a Case Study	10.1109/ICAIBD55127.2022.9820551	https://ieeexplore.ieee.org/abstract/document/9820551?casa_token=1sPatV3zq70AAAAA:uwjdTmo2cO1bnFsTkldVe6oAqT3uLGah6KsfT6VVp8OhTjT1wxLbiXzu1k28vySnb2sy5dxgrp0	exclude			yes
Robrecht, Amelie Sophie; Rothgänger, Markus; Kopp, Stefan	A Study on the Benefits and Drawbacks of Adaptivity in AI-generated Explanations	10.1145/3570945.3607339	https://doi.org/10.1145/3570945.3607339	include		exclude	yes						lay users	197
Prado-Romero, Mario Alfonso; Prenkaj, Bardh; Stilo, Giovanni; Giannotti, Fosca	A Survey on Graph Counterfactual Explanations: Definitions, Methods, Evaluation, and Research Challenges	10.1145/3618105	https://doi.org/10.1145/3618105	exclude			yes
Quincozes, Vagner E., Quincozes, Silvio E., Kazienko, Juliano F., Gama, Simone, Cheikhrouhou, Omar, Koubaa, Anis	A survey on IoT application layer protocols, security challenges, and the role of explainable AI in IoT (XAIoT)	10.1007/s10207-024-00828-w	https://scholar.google.de/scholar?hl=de&as_sdt=0%2C5&q=A+survey+on+IoT+application+layer+protocols%2C+security+challenges%2C+and+the+role+of+explainable+AI+in+IoT+%28XAIoT%29&btnG=	exclude			yes
Sheu, Ruey-Kai; Pardeshi, Mayuresh Sunil	A Survey on Medical Explainable AI (XAI): Recent Progress, Explainability Approach, Human Interaction and Scoring System.	10.3390/s22208068	https://www.mdpi.com/1424-8220/22/20/8068	exclude	review on medical xai		yes
Vultureanu-Albişi, Alexandra; Murareţu, Ionuţ; Bădică, Costin	A Trustworthy and Explainable AI Recommender System: Job Domain Case Study	10.1109/INISTA62901.2024.10683822	https://ieeexplore.ieee.org/abstract/document/10683822?casa_token=bRVoUx0dM38AAAAA:Dkvx25RKa9CoJL9mlkQSIwzHRqhQtDhys6x0RUirLIpR-SRMlxsXRHamEu-fhp8c6JfnI2dw7w	exclude			yes
Kaplan, Sinan; Uusitalo, Hannu; Lensu, Lasse	A unified and practical user-centric framework for explainable artificial intelligence	https://doi.org/10.1016/j.knosys.2023.111107	https://www.sciencedirect.com/science/article/pii/S0950705123008572	exclude			yes
Fernández, Guillermo; Gámez, Jose A.; Puerta, Jose M.; Aledo, Juan A.; Alonso-Moral, Jose M.; Bugarin, Alberto	A User Study on the Utility of Context-Aware Explanations for Assisting Data Scientists in Error Analysis of Fuzzy Decision Trees	10.1109/FUZZ-IEEE60900.2024.10611812	https://ieeexplore.ieee.org/abstract/document/10611812?casa_token=hBqTjsoHYq8AAAAA:3BTRm3g-z7wZqvKAVkCY_oKHlPWv3CsYv_qMeU7ip_p8dqAQmboDomhngRH35_IPurc77DRDPg	include		exclude	yes
Wijekoon, Anjana; Wiratunga, Nirmalie	A user-centred evaluation of DisCERN: Discovering counterfactuals for code vulnerability detection and correction	https://doi.org/10.1016/j.knosys.2023.110830	https://www.sciencedirect.com/science/article/pii/S0950705123005804	include		exclude	yes				LIME	DisCERN
Li, Yiran; Fujiwara, Takanori; Choi, Yong K.; Kim, Katherine K.; Ma, Kwan-Liu	A visual analytics system for multi-model comparison on clinical data predictions	https://doi.org/10.1016/j.visinf.2020.04.005	https://www.sciencedirect.com/science/article/pii/S2468502X20300176	include		exclude	yes
Linse, Christoph; Alshazly, Hammam; Martinetz, Thomas	A walk in the black-box: 3D visualization of large neural networks in virtual reality.	10.1007/s00521-022-07608-4	https://link.springer.com/article/10.1007/s00521-022-07608-4	exclude			yes
Prinzi, Francesco, Insalaco, Marco, Orlando, Alessia, Gaglio, Salvatore, Vitabile, Salvatore	A Yolo-Based Model for Breast Cancer Detection in Mammograms	10.1007/s12559-023-10189-6	https://link.springer.com/article/10.1007/s12559-023-10189-6	exclude			yes
Albini, Emanuele; Rago, Antonio; Baroni, Pietro; Toni, Francesca	Achieving descriptive accuracy in explanations via argumentation: The case of probabilistic classifiers.	10.3389/frai.2023.1099407	https://www.frontiersin.org/journals/artificial-intelligence/articles/10.3389/frai.2023.1099407/full	exclude	measurement to check if explanation indeed explains inner working of ai		yes
Tantithamthavorn, Chakkrit; Jiarpakdee, Jirayus; Grundy, John	Actionable Analytics: Stop Telling Me What It Is; Please Tell Me What To Do	10.1109/MS.2021.3072088	https://ieeexplore.ieee.org/abstract/document/9460977	exclude			yes
Adhikari, Ajaya; Tax, David M. J.; Satta, Riccardo; Faeth, Matthias	LEAFAGE: Example-based and Feature importance-based Explanations for Black-box ML models	10.1109/FUZZ-IEEE.2019.8858846	https://ieeexplore.ieee.org/abstract/document/8858846?casa_token=7h1bQPTGJH8AAAAA:pfDMF3xa5o7I3-NdiJNYxx1V8DB9OoVzpS6C6FazcxRi0cqdrSqeOuUuzuzhqBagGqQv3FrrXyo	include		include		yes	house price prediction	tabular data	no explanation	Leafage (combination of both)	lay users	114					min *+																			min *+
Alqaraawi, Ahmed; Schuessler, Martin; Weiß, Philipp; Costanza, Enrico; Berthouze, Nadia	Evaluating saliency map explanations for convolutional neural networks: a user study	10.1145/3377325.3377519	https://doi.org/10.1145/3377325.3377519	include		include	yes	yes	image classification	image data	no explanation	LRP	lay users	64													*+
Baniecki, Hubert; Parzych, Dariusz; Biecek, Przemyslaw	The grammar of interactive explanatory model analysis.	10.1007/s10618-023-00924-w	https://link.springer.com/article/10.1007/s10618-023-00924-w	include		include	yes	yes	healthcare	tabular data	Break-down explanation	breakdown + Ceteris Paribus + SHAP	domain experts	30					*+
Hatwell, Julian; Gaber, Mohamed Medhat; Atif Azad, R. Muhammad	Ada-WHIPS: explaining AdaBoost classification with applications in the health sciences.	10.1186/s12911-020-01201-2	https://link.springer.com/article/10.1186/s12911-020-01201-2	exclude			yes
Leberruyer, Nicolas; Ahlskog, Mats; Bruch, Jessica	Addressing challenges when adopting AI-driven Zero Defect Manufacturing: Insights from industry	https://doi.org/10.1016/j.procir.2024.10.064	https://www.sciencedirect.com/science/article/pii/S2212827124012174	include		exclude	yes
Dutta, Joy; Puthal, Deepak	Advancing eHealth in Society 5.0: A Fuzzy Logic and Blockchain-Enhanced Framework for Integrating IoMT, Edge, and Cloud With AI	10.1109/ACCESS.2024.3520799	https://ieeexplore.ieee.org/document/10810439	exclude			yes
Richard, Guy-Junior; Habonneau, Jérôme; Guériot, Didier; Le Caillec, Jean-Marc	AI Explainability and Acceptance: A Case Study for Underwater Mine Hunting	10.1145/3635113	https://doi.org/10.1145/3635113	include		exclude	yes
Recki, Lena; Esau-Held, Margarita; Lawo, Dennis; Stevens, Gunnar	AI said, She said - How Users Perceive Consumer Scoring in Practice	10.1145/3603555.3603562	https://doi.org/10.1145/3603555.3603562	include		exclude	yes
Souverain, Thomas	AI to renew public employment services? Explanation and trust of domain experts	10.1007/s43681-024-00629-w	https://link.springer.com/10.1007/s43681-024-00629-w	include		exclude	yes
Bhakte, Abhijit; Chakane, Mangesh; Srinivasan, Rajagopalan	Alarm-based explanations of process monitoring results from deep neural networks	https://doi.org/10.1016/j.compchemeng.2023.108442	https://www.sciencedirect.com/science/article/pii/S0098135423003125	include		exclude	yes
Goodman, Ellen P., Trehu, Julia	ALGORITHMIC AUDITING: CHASING AI ACCOUNTABILITY	10.1109/satml59370.2024.00037	http://digitalcommons.law.scu.edu/chtlj/vol39/iss3/1	exclude			yes
Tobias Bitzer, Martin Wiener, W. Alec Cram	Algorithmic Transparency: Concepts, Antecedents, and Consequences – A Review and Research Framework	10.17705/1cais.05214	http://aisel.aisnet.org/cais/vol52/iss1/16	exclude			yes
Huang, Zijie; Yu, Huiqun; Fan, Guisheng; Shao, Zhiqing; Li, Mingchen; Liang, Yuguo	Aligning XAI explanations with software developers’ expectations: A case study with code smell prioritization	https://doi.org/10.1016/j.eswa.2023.121640	https://www.sciencedirect.com/science/article/pii/S0957417423021425	exclude	no user study		yes
Yang, Chi-Hsin; Bernard Mwangi, Maina; Cheng, Shin-Ming; Lee, Hahn-Ming	An Adversarial Attack on Artificial Intelligence Malware Detection in Consumer Internet of Things	10.1109/MCE.2024.3482700	https://ieeexplore.ieee.org/document/10720903	exclude			yes
Bechini, Alessio; Daole, Mattia; Ducange, Pietro; Marcelloni, Francesco; Renda, Alessandro	An Application for Federated Learning of XAI Models in Edge Computing Environments	10.1109/FUZZ52849.2023.10309783	https://ieeexplore.ieee.org/abstract/document/10309783?casa_token=Fel3UScnzoUAAAAA:7V9p6V5cSSS5PitaUikQ1_hkH4ATh_zx9NgaaCa6GNuQmjTMTp07FK2toPCbfdrACAOrsXSYvHM	exclude			yes
Navarro, Álvaro, Sanchis, Javier, Maté, AleJandro, Trujillo, Juan	An Approach Aligned with Model Driven Development to Evaluate the Quality of Explainable Artificial Intelligence	10.1007/978-3-031-47112-4_27	https://link.springer.com/chapter/10.1007/978-3-031-47112-4_27	exclude			yes
Maselli, Gabriella; Esposito, Vincenzo; Bencardino, Massimiliano; Gabrielli, Laura; Nesticò, Antonio	An Artificial Neural Network Based Model for Urban Residential Property Price Forecasting	10.1007/978-3-031-74679-6_38	https://link.springer.com/10.1007/978-3-031-74679-6_38	exclude			yes
Nayebi, Amin; Tipirneni, Sindhu; Foreman, Brandon; Reddy, Chandan K.; Subbian, Vignesh	An Empirical Comparison of Explainable Artificial Intelligence Methods for Clinical Data: A Case Study on Traumatic Brain Injury.	10.48550/arXiv.2208.06717	https://pmc.ncbi.nlm.nih.gov/articles/PMC10148324/	include		exclude	yes
Kodipalli, Ashwini; Fernandes, Steven L.; Dasar, Santosh	An Empirical Evaluation of a Novel Ensemble Deep Neural Network Model and Explainable AI for Accurate Segmentation and Classification of Ovarian Tumors Using CT Images.	10.3390/diagnostics14050543	https://www.mdpi.com/2075-4418/14/5/543	exclude			yes
Hailemariam, Yoseph; Yazdinejad, Abbas; Parizi, Reza M.; Srivastava, Gautam; Dehghantanha, Ali	An Empirical Evaluation of AI Deep Explainable Tools	10.1109/GCWkshps50303.2020.9367541	https://ieeexplore.ieee.org/abstract/document/9367541	exclude	no user study		yes
Rao, Trupthi; Agarwal, Sonali; Singh, Navjot	An Empirical Evaluation of Shapley Additive Explanations: A Military Implication	10.1109/UPCON59197.2023.10434608	https://ieeexplore.ieee.org/abstract/document/10434608?casa_token=WFBfoG6qYC0AAAAA:MZ3WeL_QBkh91KySFshX-CsfHeeyGwjfZj19PSVMCliJCHOEdst7e-2UOzHBZhXIPMqFbLt9hg	exclude			yes
Rizzo, Lucas; Longo, Luca	An empirical evaluation of the inferential capacity of defeasible argumentation, non-monotonic fuzzy reasoning and expert systems	https://doi.org/10.1016/j.eswa.2020.113220	https://www.sciencedirect.com/science/article/pii/S0957417420300464	exclude			yes
Shafikuzzaman, Md; Islam, Md Rakibul; Rolli, Alex C.; Akhter, Sharmin; Seliya, Naeem	An Empirical Evaluation of the Zero-Shot, Few-Shot, and Traditional Fine-Tuning Based Pretrained Language Models for Sentiment Analysis in Software Engineering	10.1109/ACCESS.2024.3439450	https://ieeexplore.ieee.org/abstract/document/10623654	exclude			yes
Jakubik, Johannes, Schöffer, Jakob, Hoge, Vincent, Vössing, Michael, Kühl, Niklas	An Empirical Evaluation of Predicted Outcomes as Explanations in Human-AI Decision-Making	10.1007/978-3-031-23618-1_24	https://link.springer.com/chapter/10.1007/978-3-031-23618-1_24	include		exclude	yes		loan application	tabular data	no explanation	predicted outcomes for all classes	lay users	121
Jakubik, Johannes, Schöffer, Jakob, Hoge, Vincent, Vössing, Michael, Kühl, Niklas	An Empirical Evaluation of Predicted Outcomes as Explanations in Human-AI Decision-Making	10.1007/978-3-031-23618-1_24	https://link.springer.com/chapter/10.1007/978-3-031-23618-1_24	include		exclude			loan application	tabular data	no explanation	Optimal predictive trees (global feature importance)	lay users	121
Sanneman, Lindsay; Shah, Julie A.	An Empirical Study of Reward Explanations With Human-Robot Interaction Applications	10.1109/LRA.2022.3189441	https://ieeexplore.ieee.org/abstract/document/9822391?casa_token=SHXIoTgBnjsAAAAA:q-NHrDLdVIjCyi5iL1lz5RrQ4uEgJXRdvWTZaZFWrvlzDqqk-ldEL62aFD_ulOThT2HXmo08qg	include		exclude	yes
Golder, Kamrul; Islam, Md. Shymon; Tarun, Fahim Faisal; Biswas, Plabon; Akter, Shahanaj	An Empirical Study on Developing Stacking Ensemble Model for Bangla Sports Sentiment Analysis	10.1109/ICCCNT61001.2024.10723935	https://ieeexplore.ieee.org/abstract/document/10723935?casa_token=S4kgsJim5SAAAAAA:JQOemGAKSjuADUtlKfVeOMzRBXNMBEZtB9UFWrLJ13qq1CTtohs3OeKpAsuVy9_CxDtoAJ75NQ	exclude			yes
Stepin, Ilia; Alonso-Moral, Jose M.; Catala, Alejandro; Pereira-Fariña, Martín	An empirical study on how humans appreciate automated counterfactual explanations which embrace imprecise information	https://doi.org/10.1016/j.ins.2022.10.098	https://www.sciencedirect.com/science/article/pii/S002002552201218X	include		exclude	yes
Zohdinasab, Tahereh; Riccio, Vincenzo; Tonella, Paolo	An Empirical Study on Low- and High-Level Explanations of Deep Learning Misbehaviours	10.1109/ESEM56168.2023.10304866	https://ieeexplore.ieee.org/abstract/document/10304866?casa_token=W6JV1e3e-MMAAAAA:g03pf3aDL7G0NEPP1CuI64uIBlLFc-dMFWa2XHmClcNlolZODdEZndznOjC7h30ERzdUBN4JkO4	include		exclude	yes
Noack, Adam, Ahern, Isaac, Dou, Dejing, Li, Boyang	An Empirical Study on the Relation Between Network Interpretability and Adversarial Robustness	10.1007/s42979-020-00390-x	https://link.springer.com/article/10.1007/s42979-020-00390-x	exclude			yes
Naser, M. Z.	An engineer's guide to eXplainable Artificial Intelligence and Interpretable Machine Learning: Navigating causality, forced goodness, and the false perception of inference	https://doi.org/10.1016/j.autcon.2021.103821	https://www.sciencedirect.com/science/article/pii/S0926580521002727	exclude	no user study		yes
Li, Xiao-Hui; Shi, Yuhan; Li, Haoyang; Bai, Wei; Cao, Caleb Chen; Chen, Lei	An Experimental Study of Quantitative Evaluations on Saliency Methods	10.1145/3447548.3467148	https://doi.org/10.1145/3447548.3467148	exclude	no user study		yes
Sachan, Swati; Yang, Jian-Bo; Xu, Dong-Ling; Benavides, David Eraso; Li, Yang	An explainable AI decision-support-system to automate loan underwriting	https://doi.org/10.1016/j.eswa.2019.113100	https://www.sciencedirect.com/science/article/pii/S0957417419308176	exclude			yes
Leung, Carson K.; Imran, Rayan; Pazdor, Adam G.M.; Souza, Joglas	An Explainable Artificial Intelligence Solution for the Practical Application of Employee Turnover	10.1109/IV64223.2024.00055	https://ieeexplore.ieee.org/abstract/document/10714259?casa_token=k3yhDfhHoFIAAAAA:NVW0-nHXBH4ihnC_xq5-zoEjB-4bETHbZOGGdzp_SxpULTwf9BIiaYx7hM7whMZsMo5MDzJwZw	include		exclude	yes
Campos, Luis M., Fernández-Luna, Juan M., Huete, Juan F.	An explainable content-based approach for recommender systems: a case study in journal recommendation for paper submission	10.1007/s11257-024-09400-6	https://link.springer.com/article/10.1007/s11257-024-09400-6	include		exclude	yes		education	tabular and text	no explanation	global and local explanations	domain experts	17																				*+
Galanti, Riccardo; Leoni, Massimiliano de; Monaro, Merylin; Navarin, Nicolò; Marazzi, Alan; Stasi, Brigida Di; Maldera, Stéphanie	An explainable decision support system for predictive process analytics	https://doi.org/10.1016/j.engappai.2023.105904	https://www.sciencedirect.com/science/article/pii/S095219762300088X	exclude			yes
Roy, Souradip; Li, Juan; Pandey, Vikram; Bai, Yan	An Explainable Deep Neural Framework for Trustworthy Network Intrusion Detection	10.1109/MobileCloud55333.2022.00011	https://ieeexplore.ieee.org/abstract/document/9904781?casa_token=IaVO5WL6xQ8AAAAA:3zr8x7sxomzLMVf1cstM7-5_ZsypfYFtu9goQiTb07FsOPiYpFnqPKge8Pr6R1sCfzTWNX_A7A	include		exclude	yes
V.R, Nitha; S.S, Vinod Chandra	An eXplainable machine learning framework for predicting the impact of pesticide exposure in lung cancer prognosis	https://doi.org/10.1016/j.jocs.2024.102476	https://www.sciencedirect.com/science/article/pii/S1877750324002692	exclude			yes
Baron, Sam; Latham, Andrew J.; Varga, Somogy	Explainable AI and stakes in medicine: A user study	https://doi.org/10.1016/j.artint.2025.104282	https://www.sciencedirect.com/science/article/pii/S0004370225000013	include		include	yes	yes	healthcare	tabular	no explanation	causal	lay users	484										**+											***+								***+
Cabour, Garrick, Morales-Forero, Andrés, Ledoux, Élise, Bassetto, Samuel	An explanation space to align user studies with the technical development of Explainable AI	10.1007/s00146-022-01536-6	https://link.springer.com/article/10.1007/s00146-022-01536-6	exclude			yes
Hinns, James, Fan, Xiuyi, Liu, Siyuan, Raghava Reddy Kovvuri, Veera, Yalcin, Mehmet Orcun, Roggenbach, Markus	An Initial Study of Machine Learning Underspecification Using Feature Attribution Explainable AI Algorithms: A COVID-19 Virus Transmission Case Study	10.1007/978-3-030-89188-6_24	https://link.springer.com/chapter/10.1007/978-3-030-89188-6_24	exclude			yes
Yang, Xinyue, Huang, Hai, Zuo, Xingquan	An Interpretability Evaluation Framework for Decision Tree Surrogate Model-Based XAIs	10.1007/978-981-99-9836-4_9	https://link.springer.com/chapter/10.1007/978-981-99-9836-4_9	exclude			yes
Sheikhalishahi, Seyedmostafa; Bhattacharyya, Anirban; Celi, Leo Anthony; Osmani, Venet	An interpretable deep learning model for time-series electronic health records: Case study of delirium prediction in critical care.	10.1016/j.artmed.2023.102659	https://www.sciencedirect.com/science/article/pii/S0933365723001732	exclude			yes
Pan, Yuwei; Stark, Rainer	An interpretable machine learning approach for engineering change management decision support in automotive industry	https://doi.org/10.1016/j.compind.2022.103633	https://www.sciencedirect.com/science/article/pii/S0166361522000288	exclude			yes
Confalonieri, Roberto; Alonso-Moral, Jose Maria	An Operational Framework for Guiding Human Evaluation in Explainable and Trustworthy Artificial Intelligence	10.1109/MIS.2023.3334639	https://ieeexplore.ieee.org/abstract/document/10322863	include		exclude	yes
Cartolano, Andrea, Cuzzocrea, Alfredo, Pilato, Giovanni	Analyzing and assessing explainable AI models for smart agriculture environments	10.1007/s11042-023-17978-z	https://link.springer.com/article/10.1007/s11042-023-17978-z	exclude			yes
Nourani, Mahsan; Roy, Chiradeep; Block, Jeremy E; Honeycutt, Donald R; Rahman, Tahrima; Ragan, Eric; Gogate, Vibhav	Anchoring Bias Affects Mental Model Formation and User Reliance in Explainable AI Systems	10.1145/3397481.3450639	https://doi.org/10.1145/3397481.3450639	include		exclude	yes		activity detection in videos	video data	no explanation	video segments, concept and combinations explanations	lay users	110
Park, Eunkyung, Wong, Raymond K., Kwon, Junbum, Chu, Victor W.	Anchoring-and-Adjustment to Improve the Quality of Significant Features	10.1007/978-3-030-90888-1_15	https://link.springer.com/chapter/10.1007/978-3-030-90888-1_15	exclude			yes
Kebir, Sara; Tabia, Karim	Anomaly Detection in Real Scarce Data: A Case Study on Monitoring Elderly's Physical Activity and Sleep	10.1109/BIBE60311.2023.00069	https://ieeexplore.ieee.org/abstract/document/10431835?casa_token=Q0-Usmfw_mAAAAAA:6wHtR1MsWe4GFaqzVkQ4VKpETKIsiIHCcuFtZPpdGG0UpDF9sxUc2UgFStePY_g40I52nWn56w	exclude			yes
Kim, Dae Hyun; Hoque, Enamul; Agrawala, Maneesh	Answering Questions about Charts and Generating Visual Explanations	10.1145/3313831.3376467	https://doi.org/10.1145/3313831.3376467	include		exclude	yes		information extraction	image data?	no explanation	visual explanation	lay users	16																								***+
Wang, Mini; Lin, Zhiyuan; Zhou, Junjie; Xing, Lumin; Zeng, Peijin	Applications of Explainable Artificial Intelligent Algorithms to Age-related Macular Degeneration Diagnosis: A Case Study Based on CNN, Attention, and CAM Mechanism	10.1109/InC457730.2023.10263077	https://ieeexplore.ieee.org/abstract/document/10263077?casa_token=B_J9tWRA3xAAAAAA:bWLMnwxUYc531rabbp-pVhtQnSBCxyXOaJ6Iu8ar8pqoWzrqqAUkkEpXQz1f1QixRNxKtF3zWQ	exclude			yes
Kalampokis, Evangelos, Karamanou, Areti, Tarabanis, Konstantinos	Applying Explainable Artificial Intelligence Techniques on Linked Open Government Data	10.1007/978-3-030-84789-0_18	https://link.springer.com/chapter/10.1007/978-3-030-84789-0_18	exclude			yes
Hofeditz, Lennart, Clausen, Sünje, Rieß, Alexander, Mirbabaie, Milad, Stieglitz, Stefan	Applying XAI to an AI-based system for candidate management to mitigate bias and discrimination in hiring	10.1007/s12525-022-00600-9	https://link.springer.com/article/10.1007/s12525-022-00600-9	include		exclude	yes
Wang, Xinru; Yin, Ming	Are Explanations Helpful? A Comparative Study of the Effects of Explanations in AI-Assisted Decision-Making	10.1145/3397481.3450650	https://doi.org/10.1145/3397481.3450650	include		exclude	yes		recidivism prediction	tabular data	no explanation	feature importance (global)	domain experts
Wang, Xinru; Yin, Ming	Are Explanations Helpful? A Comparative Study of the Effects of Explanations in AI-Assisted Decision-Making	10.1145/3397481.3450650	https://doi.org/10.1145/3397481.3450650	include		exclude			recidivism prediction	tabular data	no explanation	feature contribution	domain experts
Wang, Xinru; Yin, Ming	Are Explanations Helpful? A Comparative Study of the Effects of Explanations in AI-Assisted Decision-Making	10.1145/3397481.3450650	https://doi.org/10.1145/3397481.3450650	include		exclude			recidivism prediction	tabular data	no explanation	nearest neighbors	domain experts
Wang, Xinru; Yin, Ming	Are Explanations Helpful? A Comparative Study of the Effects of Explanations in AI-Assisted Decision-Making	10.1145/3397481.3450650	https://doi.org/10.1145/3397481.3450650	include		exclude			recidivism prediction	tabular data	no explanation	couterfactual	domain experts
Wang, Xinru; Yin, Ming	Are Explanations Helpful? A Comparative Study of the Effects of Explanations in AI-Assisted Decision-Making	10.1145/3397481.3450650	https://doi.org/10.1145/3397481.3450650	include		exclude			forest cover prediction	tabular data	no explanation	feature importance (global)	lay users
Wang, Xinru; Yin, Ming	Are Explanations Helpful? A Comparative Study of the Effects of Explanations in AI-Assisted Decision-Making	10.1145/3397481.3450650	https://doi.org/10.1145/3397481.3450650	include		exclude			forest cover prediction	tabular data	no explanation	feature contribution	lay users
Wang, Xinru; Yin, Ming	Are Explanations Helpful? A Comparative Study of the Effects of Explanations in AI-Assisted Decision-Making	10.1145/3397481.3450650	https://doi.org/10.1145/3397481.3450650	include		exclude			forest cover prediction	tabular data	no explanation	nearest neighbors	lay users
Wang, Xinru; Yin, Ming	Are Explanations Helpful? A Comparative Study of the Effects of Explanations in AI-Assisted Decision-Making	10.1145/3397481.3450650	https://doi.org/10.1145/3397481.3450650	include		exclude			forest cover prediction	tabular data	no explanation	couterfactual	lay users
Kalimeri, Kyriaki, Tjostheim, Ingvar	Artificial Intelligence and Concerns About the Future: A Case Study in Norway	10.1007/978-3-030-50344-4_20	https://link.springer.com/chapter/10.1007/978-3-030-50344-4_20	exclude			yes
Rubinic, Igor; Kurtov, Marija; Rubinic, Ivan; Likic, Robert; Dargan, Paul I.; Wood, David M.	Artificial intelligence in clinical pharmacology: A case study and scoping review of large language models and bioweapon potential.	10.1111/bcp.15899	https://bpspubs.onlinelibrary.wiley.com/doi/abs/10.1111/bcp.15899?casa_token=ChLnj49QhqQAAAAA%3A20DaJQ-W-p-7A6F6ltAKTaU4b36_-LAIYH3Iy4DsfB6pfDOzFLM7jELKeAcl9k_Vw1r7MZ5mjt0E5SU	exclude	no user study		yes
Saen, Reza Farzipoor, Yousefi, Farzaneh, Azadi, Majid	Artificial intelligence powered predictions: enhancing supply chain sustainability	10.1007/s10479-024-06088-0	https://scholar.google.de/scholar?hl=de&as_sdt=0%2C5&q=Artificial+intelligence+powered+predictions%3A+enhancing+supply+chain+sustainability&btnG=	exclude			yes
Cabitza, Federico; Campagner, Andrea; Sconfienza, Luca Maria	As if sand were stone. New concepts and metrics to probe the ground on which to build trustable AI.	10.1186/s12911-020-01224-9	https://link.springer.com/article/10.1186/s12911-020-01224-9	exclude			yes
Dai, Shih-Chieh; Hsu, Yi-Li; Xiong, Aiping; Ku, Lun-Wei	Ask to Know More: Generating Counterfactual Explanations for Fake Claims	10.1145/3534678.3539205	https://doi.org/10.1145/3534678.3539205	include		exclude	yes
Heider, Michael; Stegherr, Helena; Nordsieck, Richard; Hähner, Jörg	Assessing Model Requirements for Explainable AI: A Template and Exemplary Case Study	10.1162/artl_a_00414	https://direct.mit.edu/artl/article/29/4/468/117306/Assessing-Model-Requirements-for-Explainable-AI-A	exclude			yes
Heider, Michael; Stegherr, Helena; Nordsieck, Richard; Hähner, Jörg	Assessing Model Requirements for Explainable AI: A Template and Exemplary Case Study.	10.1162/artl_a_00414	https://direct.mit.edu/artl/article/29/4/468/117306/Assessing-Model-Requirements-for-Explainable-AI-A	exclude			yes
Wysocki, Oskar; Davies, Jessica Katharine; Vigo, Markel; Armstrong, Anne Caroline; Landers, Dónal; Lee, Rebecca; Freitas, André	Assessing the communication gap between AI models and healthcare professionals: Explainability, utility and trust in AI-driven clinical decision-making	https://doi.org/10.1016/j.artint.2022.103839	https://www.sciencedirect.com/science/article/pii/S0004370222001795	include		exclude	yes
Moreno-Sánchez, Pedro A.; Arroyo-Fernández, Ruben; Bravo-Esteban, Elisabeth; Ferri-Morales, Asunción; van Gils, Mark	Assessing the relevance of mental health factors in fibromyalgia severity: A data-driven case study using explainable AI.	10.1016/j.ijmedinf.2023.105280	https://www.sciencedirect.com/science/article/pii/S1386505623002988	exclude			yes
Allahabadi, Himanshi; Amann, Julia; Balot, Isabelle; Beretta, Andrea; Binkley, Charles; Bozenhard, Jonas; Bruneault, Frederick; Brusseau, James; Candemir, Sema; Cappellini, Luca Alessandro; Chakraborty, Subrata; Cherciu, Nicoleta; Cociancig, Christina; Coffee, Megan; Ek, Irene; Espinosa-Leal, Leonardo; Farina, Davide; Fieux-Castagnet, Genevieve; Frauenfelder, Thomas; Gallucci, Alessio; Giuliani, …	Assessing Trustworthy AI in Times of COVID-19: Deep Learning for Predicting a Multiregional Score Conveying the Degree of Lung Compromise in COVID-19 Patients.	10.1109/TTS.2022.3195114	https://ieeexplore.ieee.org/document/9845195	exclude			yes
Aksoy, Samet; Sertel, Elif; Roscher, Ribana; Tanik, Aysegul; Hamzehpour, Nikou	Assessment of soil salinity using explainable machine learning methods and Landsat 8 images	https://doi.org/10.1016/j.jag.2024.103879	https://www.sciencedirect.com/science/article/pii/S1569843224002334	exclude			yes
Wang, Yuning; Yang, Zhongqi; Azimi, Iman; Rahmani, Amir M.; Liljeberg, Pasi	Attention-Based Explainable AI for Wearable Multivariate Data: A Case Study on Affect Status Prediction	10.1109/BSN63547.2024.10780702	https://ieeexplore.ieee.org/abstract/document/10780702	exclude			yes
Becker, Sören; Vielhaben, Johanna; Ackermann, Marcel; Müller, Klaus-Robert; Lapuschkin, Sebastian; Samek, Wojciech	AudioMNIST: Exploring Explainable Artificial Intelligence for audio analysis on a simple benchmark	https://doi.org/10.1016/j.jfranklin.2023.11.038	https://www.sciencedirect.com/science/article/pii/S0016003223007536	exclude			yes
Birhane, Abeba; Prabhu, Vinay Uday; Whaley, John	Auditing saliency cropping algorithms	10.1109/WACV51458.2022.00158	https://openaccess.thecvf.com/content/WACV2022/html/Birhane_Auditing_Saliency_Cropping_Algorithms_WACV_2022_paper.html	exclude			yes
Mehdiyev, Nijat; Majlatow, Maxim; Fettke, Peter	Augmenting post-hoc explanations for predictive process monitoring with uncertainty quantification via conformalized Monte Carlo dropout	https://doi.org/10.1016/j.datak.2024.102402	https://www.sciencedirect.com/science/article/pii/S0169023X24001265	include		exclude	yes
Castelnovo, Alessandro, Depalmas, Roberto, Mercorio, Fabio, Mombelli, Nicolò, Potertì, Daniele, Serino, Antonio, Seveso, Andrea, Sorrentino, Salvatore, Viola, Laura	Augmenting XAI with LLMs: A Case Study in Banking Marketing Recommendation	10.1007/978-3-031-63787-2_11	https://link.springer.com/chapter/10.1007/978-3-031-63787-2_11	exclude			yes
Baur, Katharina; Rosenfelder, Markus; Lutz, Bernhard	Automated real estate valuation with machine learning models using property descriptions	https://doi.org/10.1016/j.eswa.2022.119147	https://www.sciencedirect.com/science/article/pii/S0957417422021650	exclude			yes
Obster, Fabian; Ciolacu, Monica I.; Humpe, Andreas	Balancing Predictive Performance and Interpretability in Machine Learning: A Scoring System and an Empirical Study in Traffic Prediction	10.1109/ACCESS.2024.3521242	https://ieeexplore.ieee.org/abstract/document/10811902	exclude			yes
Bargagna, Filippo; Anita De Santi, Lisa; Santarelli, Maria Filomena; Positano, Vincenzo; Vanello, Nicola	Bayesian XAI Methods Towards a Robustness-Centric Approach to Deep Learning: An ABIDE I Study	10.1109/MeMeA60663.2024.10596826	https://ieeexplore.ieee.org/abstract/document/10596826?casa_token=6t-XR9EhhewAAAAA:OdY-F2LvxP3kcSSF-fN5ITIeW3_rDZnCQbTplx7gN1iTeJ6QM4_0eixZmVj6MX-M8mwTmlRirw	include		exclude	yes
Rieger, Tobias; Manzey, Dietrich; Meussling, Benigna; Onnasch, Linda; Roesler, Eileen	Be careful what you explain: Benefits and costs of explainable AI in a simulated medical task	https://doi.org/10.1016/j.chbah.2023.100021	https://www.sciencedirect.com/science/article/pii/S294988212300021X	include		exclude	yes
Boidot, Corentin; Augereau, Olivier; De Loor, Pierre; Lefort, Riwal	Benefits of Using Multiple Post-Hoc Explanations for Machine Learning	10.1109/ICMLA58977.2023.00116	https://ieeexplore.ieee.org/abstract/document/10459877?casa_token=fkHnHSu2EKMAAAAA:-cmYbWTY40glNyyu2T0YYdGAjYucPOo0VFq4-FR6A9fUzU9ueXSsZoHT9W1nB1wtlZSuMak0eQ	exclude		exclude	yes
Li, Zhouyayan; Demir, Ibrahim	Better localized predictions with Out-of-Scope information and Explainable AI: One-Shot SAR backscatter nowcast framework with data from neighboring region	https://doi.org/10.1016/j.isprsjprs.2023.11.021	https://www.sciencedirect.com/science/article/pii/S092427162300326X	exclude			yes
Esposito, Matteo; Palagiano, Francesco; Lenarduzzi, Valentina; Taibi, Davide	Beyond Words: On Large Language Models Actionability in Mission-Critical Risk Analysis	10.1145/3674805.3695401	https://doi.org/10.1145/3674805.3695401	exclude			yes
Westhuizen, Stephan van der; Heuvelink, Gerard B. M.; Gardner-Lubbe, Sugnet; Clarke, Catherine E.	Biplots for understanding machine learning predictions in digital soil mapping	https://doi.org/10.1016/j.ecoinf.2024.102892	https://www.sciencedirect.com/science/article/pii/S1574954124004345	include		exclude	yes
Sudhi, Viju; Wehnert, Sabine; Homner, Norbert Michael; Ernst, Sebastian; Gonter, Mark; Krug, Andreas; De Luca, Ernesto William	BiTe-REx: An Explainable Bilingual Text Retrieval System in the Automotive Domain	10.1145/3477495.3531665	https://doi.org/10.1145/3477495.3531665	include		exclude	yes
Sachan, Swati, Dezem, Vinicius, Fickett, Dale	Blockchain for Ethical and Transparent Generative AI Utilization by Banking and Finance Lawyers	10.1007/978-3-031-63800-8_16	https://link.springer.com/chapter/10.1007/978-3-031-63800-8_16	exclude			yes
Sachan, Swati; Liu (Lisa), Xi	Blockchain-based auditing of legal decisions supported by explainable AI and generative AI tools	https://doi.org/10.1016/j.engappai.2023.107666	https://www.sciencedirect.com/science/article/pii/S095219762301850X	exclude			yes
Boresta, Marco, Pinto, Diego Maria, Stecca, Giuseppe	Bridging operations research and machine learning for service cost prediction in logistics and service industries	10.1007/s10479-024-05962-1	https://link.springer.com/article/10.1007/s10479-024-05962-1	exclude			yes
Baron, Sam; Latham, Andrew J.; Varga, Somogy	Explainable AI and stakes in medicine: A user study	https://doi.org/10.1016/j.artint.2025.104282	https://www.sciencedirect.com/science/article/pii/S0004370225000013	include		include		yes	healthcare	tabular	no explanation	counterfactual	lay users	484																					***+								***+
Bove, Clara; Aigrain, Jonathan; Lesot, Marie-Jeanne; Tijus, Charles; Detyniecki, Marcin	Contextualization and Exploration of Local Feature Importance Explanations to Improve Understanding and Satisfaction of Non-Expert Users	10.1145/3490099.3511139	https://doi.org/10.1145/3490099.3511139	include		include	yes	yes	insurance	tabular	SHAP	SHAP + contextualization	lay users	80
Bove, Clara; Aigrain, Jonathan; Lesot, Marie-Jeanne; Tijus, Charles; Detyniecki, Marcin	Contextualization and Exploration of Local Feature Importance Explanations to Improve Understanding and Satisfaction of Non-Expert Users	10.1145/3490099.3511139	https://doi.org/10.1145/3490099.3511139	include		include		yes	insurance	tabular	SHAP	SHAP + exploration + PDP	lay users	80
Mia, Maraz; Derakhshan, Darius; Pritom, Mir Mehedi Ahsan	Can Features for Phishing URL Detection Be Trusted Across Diverse Datasets? A Case Study with Explainable AI	10.1145/3704522.3704532	https://doi.org/10.1145/3704522.3704532	include		exclude	yes
Rashid, Muhammad, Amparore, Elvio, Ferrari, Enrico, Verda, Damiano	Can I Trust My Anomaly Detection System? A Case Study Based on Explainable AI	10.1007/978-3-031-63803-9_13	https://link.springer.com/chapter/10.1007/978-3-031-63803-9_13	exclude			yes
Pimenidis, Elias, Soomro, Kamran, Papaleonidas, Antonios, Psathas, Anastasios Panagiotis	Can Machine Learning Support Improvement in Effective Nutrition of Patients in Critical Care Units?	10.1007/978-3-031-44198-1_12	https://link.springer.com/chapter/10.1007/978-3-031-44198-1_12	exclude			yes
Bove, Clara; Lesot, Marie-Jeanne; Tijus, Charles Albert; Detyniecki, Marcin	Investigating the Intelligibility of Plural Counterfactual Examples for Non-Expert Users: an Explanation User Interface Proposition and User Study	10.1145/3581641.3584082	https://doi.org/10.1145/3581641.3584082	include		include	yes	yes	loan application	tabular data	single counterfactual	plural counterfactual	lay users	112																			**+
Bove, Clara; Lesot, Marie-Jeanne; Tijus, Charles Albert; Detyniecki, Marcin	Investigating the Intelligibility of Plural Counterfactual Examples for Non-Expert Users: an Explanation User Interface Proposition and User Study	10.1145/3581641.3584082	https://doi.org/10.1145/3581641.3584082	include		include		yes	loan application	tabular data	single counterfactual	guided plural counterfactual	lay users	112																			*+
Buçinca, Zana; Lin, Phoebe; Gajos, Krzysztof Z.; Glassman, Elena L.	Proxy tasks and subjective measures can be misleading in evaluating explainable AI systems	10.1145/3377325.3377498	https://doi.org/10.1145/3377325.3377498	include		include	yes	yes	DSS (nutrition ranking)	image data	concept-based? ("deductive")	example-based ("inductive")	lay users	183										*+																							***+
Warren, Greta; Byrne, Ruth M. J.; Keane, Mark T.	Categorical and Continuous Features in Counterfactual Explanations of AI Systems	10.1145/3581641.3584090	https://doi.org/10.1145/3581641.3584090	exclude
Buçinca, Zana; Lin, Phoebe; Gajos, Krzysztof Z.; Glassman, Elena L.	Proxy tasks and subjective measures can be misleading in evaluating explainable AI systems	10.1145/3377325.3377498	https://doi.org/10.1145/3377325.3377498	include		include		yes	DSS (nutrition ranking)	image data	no explanation	either one of both	lay users	102										***+																			**+
Buçinca, Zana; Lin, Phoebe; Gajos, Krzysztof Z.; Glassman, Elena L.	Proxy tasks and subjective measures can be misleading in evaluating explainable AI systems	10.1145/3377325.3377498	https://doi.org/10.1145/3377325.3377498	include		include		yes	DSS (nutrition ranking)	image data	concept-based? ("deductive")	example-based ("inductive")	lay users	102										*-
Kim, Wonjoon; Nam, Keonwoo; Son, Youngdoo	Categorizing affective response of customer with novel explainable clustering algorithm: The case study of Amazon reviews	https://doi.org/10.1016/j.elerap.2023.101250	https://www.sciencedirect.com/science/article/pii/S1567422323000157	exclude			yes
Taylor-Melanson, Will, Sadeghi, Zahra, Matwin, Stan	Causal generative explainers using counterfactual inference: a case study on the Morpho-MNIST dataset	10.1007/s10044-024-01306-8	https://link.springer.com/article/10.1007/s10044-024-01306-8	exclude			yes
Naser, M. Z.	Causality in structural engineering: discovering new knowledge by tying induction and deduction via mapping functions and explainable artificial intelligence	10.1007/s43503-022-00005-9	https://link.springer.com/article/10.1007/s43503-022-00005-9	include		exclude	yes
Wijekoon, Anjana, Wiratunga, Nirmalie, Martin, Kyle, Corsar, David, Nkisi-Orji, Ikechukwu, Palihawadana, Chamath, Bridge, Derek, Pradeep, Preeja, Agudo, Belen Diaz, Caro-Martínez, Marta	CBR Driven Interactive Explainable AI	10.1007/978-3-031-40177-0_11	https://link.springer.com/chapter/10.1007/978-3-031-40177-0_11	include		exclude	yes
Islam, Md. Minhazul; Hasan, S. M. Mahedy; Hossain, Md. Rakib; Srizon, Azmain Yakin; Akter, Farzana; Faruk, Md. Farukuzzaman; Shraboni Akter, Sheikh	Channel Attention-Guided Lightweight CNN Meets Extreme Learning Machine: Multi-Class Crop Leaf Disease Classification with Explainable AI	10.1109/ICCIT60459.2023.10441609	https://ieeexplore.ieee.org/abstract/document/10441609?casa_token=nru7SlA7Dj4AAAAA:yUzjeY3ubAhq0_s91ccccgA3WoqQOgzD5tvuZNxls4XKwKZ--c8hJ0G9QztY-vjTEmP1Zyes1Nw	exclude			yes
Ehsan, Upol; Saha, Koustuv; De Choudhury, Munmun; Riedl, Mark O.	Charting the Sociotechnical Gap in Explainable AI: A Framework to Address the Gap in XAI	10.1145/3579467	https://doi.org/10.1145/3579467	exclude			yes
Hatwell, Julian, Gaber, Mohamed Medhat, Azad, R. Muhammad Atif	CHIRPS: Explaining random forest classification	10.1007/s10462-020-09833-6	https://link.springer.com/article/10.1007/s10462-020-09833-6	exclude			yes
Bashir, Zahra; Lin, Manxi; Feragen, Aasa; Mikolaj, Kamil; Taksøe-Vester, Caroline; Christensen, Anders Nymark; Svendsen, Morten B. S.; Fabricius, Mette Hvilshøj; Andreasen, Lisbeth; Nielsen, Mads; Tolsgaard, Martin Grønnebæk	Clinical validation of explainable AI for fetal growth scans through multi-level, cross-institutional prospective end-user evaluation.	10.1038/s41598-025-86536-4	https://pubmed.ncbi.nlm.nih.gov/39820804/	include		exclude	yes
Bhowmik, Abhimanyu; Sannigrahi, Madhushree; Chowdhury, Deepraj; Dey, Ajoy; Gill, Sukhpal Singh	CloudAISim: A toolkit for modelling and simulation of modern applications in AI-driven cloud computing environments	https://doi.org/10.1016/j.tbench.2024.100150	https://www.sciencedirect.com/science/article/pii/S2772485924000024	exclude			yes
Cheng et al	Explaining decision-making algorithms through UI: Strategies to help non-expert stakeholders	10.1145/3290605.3300789	https://dl.acm.org/doi/10.1145/3290605.3300789	include	From Backward referencing	include	yes	yes	graduate schoole admission	tabular data	no explanation	interactive example based	lay users	199																			***+										**+
Abdul, Ashraf; von der Weth, Christian; Kankanhalli, Mohan; Lim, Brian Y.	COGAM: Measuring and Moderating Cognitive Load in Machine Learning Model Explanations	10.1145/3313831.3376615	https://doi.org/10.1145/3313831.3376615	include		exclude	yes	yes	house price prediction	tabular	GAM	COGAM	lay users	305															**-	**+													**-
Abdul, Ashraf; von der Weth, Christian; Kankanhalli, Mohan; Lim, Brian Y.	COGAM: Measuring and Moderating Cognitive Load in Machine Learning Model Explanations	10.1145/3313831.3376615	https://doi.org/10.1145/3313831.3376615	include		exclude		yes	house price prediction	tabular	sLM	COGAM	lay users	305															**+
Cheng et al	Explaining decision-making algorithms through UI: Strategies to help non-expert stakeholders	10.1145/3290605.3300789	https://dl.acm.org/doi/10.1145/3290605.3300789	include	From Backward referencing	include		yes	graduate schoole admission	tabular data	static example based	interactive example based	lay users	199																			***+										**
Collaris, Dennis, Wijk, Jarke J.	Comparative evaluation of contribution-value plots for machine learning understanding	10.1007/s12650-021-00776-w	https://link.springer.com/article/10.1007/s12650-021-00776-w	include		include	yes	yes	wine quality prediction	tabular	GCV Plot	ICE Plot	AI experts	22					***-
Confalonieri, Roberto; Weyde, Tillman; Besold, Tarek R.; Martín, Fermín Moscoso del Prado	Using ontologies to enhance human understandability of global post-hoc explanations of black-box models	https://doi.org/10.1016/j.artint.2021.103471	https://www.sciencedirect.com/science/article/pii/S0004370221000229	include		include	yes	yes	healthcare and finance	tabular data	decision tree	ontology-based decision tree	lay users	63					***+																					***+
Itani, Sarah; Thanou, Dorina	Combining anatomical and functional networks for neuropathology identification: A case study on autism spectrum disorder.	10.1016/j.media.2021.101986	https://www.sciencedirect.com/science/article/abs/pii/S1361841521000323	exclude			yes
Lira, Diego Bezerra; Xavier, Fernando; Digiampietri, Luciano Antonio	Combining clustering and classification algorithms for automatic bot detection: a case study on posts about COVID-19	10.1145/3466933.3466970	https://doi.org/10.1145/3466933.3466970	exclude			yes
Mello, Caio; Cheema, Gullal S.; Thakkar, Gaurish	Combining sentiment analysis classifiers to explore multilingual news articles covering London 2012 and Rio 2016 Olympics.	10.1007/s42803-022-00052-9	https://link.springer.com/article/10.1007/s42803-022-00052-9	exclude			yes
Yu, Jiarui; Chang, Ximing; Hu, Songhua; Yin, Haodong; Wu, Jianjun	Combining travel behavior in metro passenger flow prediction: A smart explainable Stacking-Catboost algorithm	https://doi.org/10.1016/j.ipm.2024.103733	https://www.sciencedirect.com/science/article/pii/S0306457324000931	exclude			yes
Wang, Xingbo; Huang, Renfei; Jin, Zhihua; Fang, Tianqing; Qu, Huamin	CommonsenseVIS: Visualizing and Understanding Commonsense Reasoning Capabilities of Natural Language Models	10.1109/TVCG.2023.3327153	https://ieeexplore.ieee.org/abstract/document/10297594?casa_token=fHMoti2oqcEAAAAA:XuPVWCjpXg0eirMIpk_0TSs4ek1b9al5YQWXxl5BL7rQHibcQwG8-IAyRIXkJaF1qIOo5h6IBQ	include		exclude	yes
Xu, Lichang; Ning, Shaowei; Xu, Xiaoyan; Wang, Shenghan; Chen, Le; Long, Rujian; Zhang, Shengyi; Zhou, Yuliang; Zhang, Min; Thapa, Bhesh Raj	Comparative analysis of machine learning models and explainable AI for agriculture drought prediction: A case study of the Ta-pieh mountains	https://doi.org/10.1016/j.agwat.2024.109176	https://www.sciencedirect.com/science/article/pii/S0378377424005122	exclude			yes
Eisbach, Simon; Langer, Markus; Hertel, Guido	Optimizing human-AI collaboration: Effects of motivation and accuracy information in AI-supported decision-making	https://doi.org/10.1016/j.chbah.2023.100015	https://www.sciencedirect.com/science/article/pii/S2949882123000154	include		include	yes	yes	HR personal selection	tabular data	xai	xai + accuracy information	lay users	337
Divya Venkatesh, Jeevithashree; Jaiswal, Aparajita; Nanda, Gaurav	Comparing human text classification performance and explainability with large language and machine learning models using eye-tracking.	10.1038/s41598-024-65080-7	https://www.nature.com/articles/s41598-024-65080-7	include		exclude	yes
Aechtner, Jonathan; Cabrera, Lena; Katwal, Dennis; Onghena, Pierre; Valenzuela, Diego Penroz; Wilbik, Anna	Comparing User Perception of Explanations Developed with XAI Methods	10.1109/FUZZ-IEEE55066.2022.9882743	https://ieeexplore.ieee.org/abstract/document/9882743?casa_token=pn0LHz-cVZYAAAAA:GbQfkAr7qGkS1f-eav3pwNO9jebOjSprVUufZj-Qg6QLnw7o4aitNpdr75iCWnNu9zQbvOmFoQ	include		exclude	yes		education	tabular data	shap global	PDP	lay users	60
Aechtner, Jonathan; Cabrera, Lena; Katwal, Dennis; Onghena, Pierre; Valenzuela, Diego Penroz; Wilbik, Anna	Comparing User Perception of Explanations Developed with XAI Methods	10.1109/FUZZ-IEEE55066.2022.9882743	https://ieeexplore.ieee.org/abstract/document/9882743?casa_token=pn0LHz-cVZYAAAAA:GbQfkAr7qGkS1f-eav3pwNO9jebOjSprVUufZj-Qg6QLnw7o4aitNpdr75iCWnNu9zQbvOmFoQ	include		exclude			education	tabular data	shap local	LIME	lay users	60
Aechtner, Jonathan; Cabrera, Lena; Katwal, Dennis; Onghena, Pierre; Valenzuela, Diego Penroz; Wilbik, Anna	Comparing User Perception of Explanations Developed with XAI Methods	10.1109/FUZZ-IEEE55066.2022.9882743	https://ieeexplore.ieee.org/abstract/document/9882743?casa_token=pn0LHz-cVZYAAAAA:GbQfkAr7qGkS1f-eav3pwNO9jebOjSprVUufZj-Qg6QLnw7o4aitNpdr75iCWnNu9zQbvOmFoQ	include		exclude			education	tabular data	local	global	lay users	60
Aechtner, Jonathan; Cabrera, Lena; Katwal, Dennis; Onghena, Pierre; Valenzuela, Diego Penroz; Wilbik, Anna	Comparing User Perception of Explanations Developed with XAI Methods	10.1109/FUZZ-IEEE55066.2022.9882743	https://ieeexplore.ieee.org/abstract/document/9882743?casa_token=pn0LHz-cVZYAAAAA:GbQfkAr7qGkS1f-eav3pwNO9jebOjSprVUufZj-Qg6QLnw7o4aitNpdr75iCWnNu9zQbvOmFoQ	include		exclude			education	tabular data	local	global	lay users	36
Ramos, Daniel, Faria, Pedro, Vale, Zita	Comparison of Inputs Correlation and Explainable Artificial Intelligence Recommendations for Neural Networks Forecasting Electricity Consumption	10.1007/978-3-031-48652-4_4	https://link.springer.com/chapter/10.1007/978-3-031-48652-4_4	exclude			yes
Siderska, Julia, Aini, Suraya Nabilah Binti Mohd, Kedziora, Damian	Complementing Robotic Process Automation with Generative Artificial Intelligence (ChatGPT), Case of Robocorp	10.1007/978-3-031-53960-2_4	https://link.springer.com/chapter/10.1007/978-3-031-53960-2_4	exclude			yes
Mazroa, Alanoud Al; Maray, Mohammed; Alashjaee, Abdullah M.; Alotaibi, Faiz Abdullah; Alzahrani, Ahmad A.; Alkharashi, Abdulwhab; Alotaibi, Shoayee Dlaim; Alnfiai, Mrim M.	Computer Vision With Explainable Artificial Intelligence for Visual Pollution Detection in the Kingdom of Saudi Arabia	10.1109/ACCESS.2024.3513696	https://ieeexplore.ieee.org/abstract/document/10786207/	exclude			yes
Barua, Adrita, Widmer, Cara, Hitzler, Pascal	Concept Induction Using LLMs: A User Experiment for Assessment	10.1007/978-3-031-71170-1_13	https://link.springer.com/chapter/10.1007/978-3-031-71170-1_13	include		exclude	yes	yes	image detection	image data	ECII (conceptbased)	concept-based with LLM	lay users	300
Huang, Jinbin; Mishra, Aditi; Kwon, Bum Chul; Bryan, Chris	ConceptExplainer: Interactive Explanation for Deep Neural Networks from a Concept Perspective	10.1109/TVCG.2022.3209384	https://ieeexplore.ieee.org/abstract/document/9903285?casa_token=EX8bC6YhfEgAAAAA:uLj1Rga5xPAW-JYEmPhQ4UlheGRtFJR9NRtgwoPfYUHIytKfSFK1KZUJlXe8T136DCeB6mATXA	include		exclude	yes
Anjomshoae, Sule; Omeiza, Daniel; Jiang, Lili	Context-based image explanations for deep neural networks	https://doi.org/10.1016/j.imavis.2021.104310	https://www.sciencedirect.com/science/article/pii/S0262885621002158	include		exclude	yes
Famiglini, Lorenzo; Campagner, Andrea; Barandas, Marilia; La Maida, Giovanni Andrea; Gallazzi, Enrico; Cabitza, Federico	Evidence-based XAI: An empirical approach to design more effective and explainable decision support systems.	10.1016/j.compbiomed.2024.108042	https://www.sciencedirect.com/science/article/pii/S0010482524001264	include		include	yes	yes	healthcare	image data	sematic coloring CAM	traditional coloring CAM	domain experts	16
Famiglini, Lorenzo; Campagner, Andrea; Barandas, Marilia; La Maida, Giovanni Andrea; Gallazzi, Enrico; Cabitza, Federico	Evidence-based XAI: An empirical approach to design more effective and explainable decision support systems.	10.1016/j.compbiomed.2024.108042	https://www.sciencedirect.com/science/article/pii/S0010482524001264	include		include		yes	healthcare	image data	lower-level feature CAM	higher level feature CAM	domain experts	16
Flutura, Simon; Seiderer, Andreas; Huber, Tobias; Weitz, Katharina; Aslan, Ilhan; Schlagowski, Ruben; André, Elisabeth; Rathmann, Joachim	Interactive Machine Learning and Explainability in Mobile Classification of Forest-Aesthetics	10.1145/3411170.3411225	https://doi.org/10.1145/3411170.3411225	include		include	yes	yes	image detection	image data	no explanation	deep taylor decomposition (saliency maps)	lay users	31																				***+										*+
Gates, Lawrence, Leake, David, Wilkerson, Kaitlynne	Cases Are King: A User Study of Case Presentation to Explain CBR Decisions	10.1007/978-3-031-40177-0_10	https://link.springer.com/chapter/10.1007/978-3-031-40177-0_10	include		include		yes	alcohol level prediction	tabular data	kNN + Counterfactual	kNN+ Differences (Tabular)	lay users	89								**+		**+
Gates, Lawrence, Leake, David, Wilkerson, Kaitlynne	Cases Are King: A User Study of Case Presentation to Explain CBR Decisions	10.1007/978-3-031-40177-0_10	https://link.springer.com/chapter/10.1007/978-3-031-40177-0_10	include		include		yes	alcohol level prediction	tabular data	kNN + Counterfactual	kNN+ Differences (Text)	lay users	89										*+
Gates, Lawrence, Leake, David, Wilkerson, Kaitlynne	Cases Are King: A User Study of Case Presentation to Explain CBR Decisions	10.1007/978-3-031-40177-0_10	https://link.springer.com/chapter/10.1007/978-3-031-40177-0_10	include		include	yes	yes	alcohol level prediction	tabular data	kNN + Counterfactual	kNN	lay users	89								*+		*+
White, Adam, Ngan, Kwun Ho, Phelan, James, Ryan, Kevin, Afgeh, Saman Sadeghi, ReJa-Aldasoro, Constantino Carlos, Garcez, Artur d’Avila	Contrastive counterfactual visual explanations with overdetermination	10.1007/s10994-023-06333-w	https://link.springer.com/article/10.1007/s10994-023-06333-w	include		exclude	yes
Krarup, Benjamin; Krivic, Senka; Magazzeni, Daniele; Long, Derek; Cashmore, Michael; Smith, David E.	Contrastive Explanations of Plans through Model Restrictions	10.1613/jair.1.12813	https://doi.org/10.1613/jair.1.12813	exclude			yes
Malandri, Lorenzo; Mercorio, Fabio; Mezzanzanica, Mario; Nobani, Navid; Seveso, Andrea	ContrXT: Generating contrastive explanations from any text classifier	https://doi.org/10.1016/j.inffus.2021.11.016	https://www.sciencedirect.com/science/article/pii/S1566253521002426	include		exclude	yes
Hernandez-Bocanegra, Diana C.; Ziegler, Jürgen	Conversational review-based explanations for recommender systems: Exploring users’ query behavior	10.1145/3469595.3469596	https://doi.org/10.1145/3469595.3469596	include		exclude	yes
Malandri, Lorenzo, Mercorio, Fabio, Mezzanzanica, Mario, Nobani, Navid	ConvXAI: a System for Multimodal Interaction with Any Black-box Explainer	10.1007/s12559-022-10067-7	https://link.springer.com/article/10.1007/s12559-022-10067-7	include		exclude	yes
Olson, Matthew L.; Khanna, Roli; Neal, Lawrence; Li, Fuxin; Wong, Weng-Keen	Counterfactual state explanations for reinforcement learning agents via generative deep learning	https://doi.org/10.1016/j.artint.2021.103455	https://www.sciencedirect.com/science/article/pii/S0004370221000060	include		exclude	yes		game	image/ time series data	no explanation	generative Counterfactual	lay users	60
Chadaga, Krishnaraj; Prabhu, Srikanth; Bhat, Vivekananda; Sampathila, Niranjana; Umakanth, Shashikiran; Upadya P, Sudhakara	COVID-19 diagnosis using clinical markers and multiple explainable artificial intelligence approaches: A case study from Ecuador.	10.1016/j.slast.2023.09.001	https://www.sciencedirect.com/science/article/pii/S2472630323000584	exclude	no user study		yes
Stephen Meisenbacher, Peter Norlander	Creating Data from Unstructured Text with Context Rule Assisted Machine Learning (CRAML)	10.2139/ssrn.4321894	http://ecommons.luc.edu/business_facpubs/233	exclude			yes
Marvasti-Zadeh, Seyed Mojtaba; Goodsman, Devin; Ray, Nilanjan; Erbilgin, Nadir	Crown-CAM: Interpretable Visual Explanations for Tree Crown Detection in Aerial Images	10.1109/LGRS.2023.3271649	https://ieeexplore.ieee.org/abstract/document/10113224?casa_token=NbN1Qx-9zXkAAAAA:BKGpSjoN4krP0eUB3Yu3rV0ecFlgQfz0kF_QGfak0QKufr_zVfJrwc6hRoTG3yq6FcwJCC112g	exclude			yes
Balbino, Marcelo de Sousa; Gálvez, Luis Enrique Zárate; Nobre, Cristiane Neri	CSSE - An agnostic method of counterfactual, selected, and social explanations for classification models	https://doi.org/10.1016/j.eswa.2023.120373	https://www.sciencedirect.com/science/article/pii/S0957417423008758	exclude			yes
Peters, Uwe; Carman, Mary	Cultural Bias in Explainable AI Research: A Systematic Analysis	10.1613/jair.1.14888	https://doi.org/10.1613/jair.1.14888	exclude			yes
Berenji, Amirhossein, Nowaczyk, Sławomir, Taghiyarrenani, Zahra	Data-Centric Perspective on Explainability Versus Performance Trade-Off	10.1007/978-3-031-30047-9_4	https://link.springer.com/chapter/10.1007/978-3-031-30047-9_4	exclude			yes
Zhang, Yan; Teoh, Bak Koon; Wu, Maozhi; Chen, Jiayu; Zhang, Limao	Data-driven estimation of building energy consumption and GHG emissions using explainable artificial intelligence	https://doi.org/10.1016/j.energy.2022.125468	https://www.sciencedirect.com/science/article/pii/S0360544222023507	exclude			yes
Chen, Zelu, Quan, Hechun, Jin, Ri, Lin, Zhehao, Jin, Guangzhu	Debris flow susceptibility assessment based on boosting ensemble learning techniques: a case study in the Tumen River basin, China	10.1007/s00477-024-02683-6	https://link.springer.com/article/10.1007/s00477-024-02683-6	exclude			yes
Schneider, Johannes, Meske, Christian, Vlachos, Michalis	Deceptive XAI: Typology, Creation and Detection	10.1007/s42979-023-02401-z	https://link.springer.com/article/10.1007/s42979-023-02401-z	include		exclude	yes
Wang, Xiyuan; Xie, Laixin; Wang, He; Xing, Xingxing; Wan, Wei; Wu, Ziming; Ma, Xiaojuan; Li, Quan	Deciphering Explicit and Implicit Features for Reliable, Interpretable, and Actionable User Churn Prediction in Online Video Games.	10.1109/TVCG.2024.3487974	https://ieeexplore.ieee.org/abstract/document/10738201?casa_token=1vxHTvs96zwAAAAA:BmRsUyU4ldPtcDFckKgPgqY5EQWzqjeIrqfuDIbOepAERs9pHEU9IaNqe3HGTiRxBGVNDy62uA	include		exclude	yes
Lamptey, Odartey; Ouelhadj, Djamila; Rösner, Anna; Hopgood, Adrian; Gegov, Alexander; Da Deppo, Serge	Decision Tree Ensemble Based Classification of Terrorist Attacks Using eXplainable Artificial Intelligence	10.1109/IS61756.2024.10705240	https://ieeexplore.ieee.org/abstract/document/10705240?casa_token=afpJ8GwkZCQAAAAA:tOVXJI8u_hsimYVsi2MdwDH0DgmdMIjpDPg_EnRyd86BtsMnhzoimhvlwRSyk4WGcOHMbBeYFQ	exclude	no user study		yes
Hasan, Sakibul; Nabila, Maisha Musarrat; Anis, Rijeet Bin; Rab, Raqeebir	Deep Learning-Based Model with XAI for Brain Tumor Classification and Segmentation Using MRI Images	10.1109/WIECON-ECE60392.2023.10456517	https://ieeexplore.ieee.org/abstract/document/10456517?casa_token=AqOizRFgW60AAAAA:mqXGtSkAa66WZcaEoKq7LPC6tkX7UOQrIQqjF0powrDY2Zy8ljXZzqoU5Cr8EC6-lJYNOo4zCA	exclude			yes
Yang, Xianglin; Lin, Yun; Zhang, Yifan; Huang, Linpeng; Dong, Jin Song; Mei, Hong	DeepDebugger: An Interactive Time-Travelling Debugging Approach for Deep Classifiers	10.1145/3611643.3616252	https://doi.org/10.1145/3611643.3616252	include		exclude	yes
Corchado, Juan M.; Chamoso, Pablo; Hernández, Guillermo; Gutierrez, Agustín San Roman; Camacho, Alberto Rivas; González-Briones, Alfonso; Pinto-Santos, Francisco; Goyenechea, Enrique; Garcia-Retuerta, David; Alonso-Miguel, María; Hernandez, Beatriz Bellido; Villaverde, Diego Valdeolmillos; Sanchez-Verdejo, Manuel; Plaza-Martínez, Pablo; López-Pérez, Manuel; Manzano-García, Sergio; Alonso, Ricardo…	Deepint.net: A Rapid Deployment Platform for Smart Territories.	10.3390/s21010236	https://www.mdpi.com/1424-8220/21/1/236	exclude			yes
Pornprasit, Chanathip; Tantithamthavorn, Chakkrit Kla	DeepLineDP: Towards a Deep Learning Approach for Line-Level Defect Prediction	10.1109/TSE.2022.3144348	https://ieeexplore.ieee.org/abstract/document/9689967?casa_token=4SbnJCQC1jYAAAAA:1ISA-WokCtVja-uj9FXw5ihEfb0uPq6g3BANNDAOm1ChKa01WRk_MoG58VH_S92IltMGUsG6QLA	exclude			yes
Wang, Zhijie; Huang, Yuheng; Song, Da; Ma, Lei; Zhang, Tianyi	DeepSeer: Interactive RNN Explanation and Debugging via State Abstraction	10.1145/3544548.3580852	https://doi.org/10.1145/3544548.3580852	include		exclude	yes
Cavagnetto, Nicola; Venditti, Roberto; Cocchioni, Matteo; Bonelli, Stefano	Demo: SectorX, an en-route ATC simulator for AI-based decision support to Air Traffic Controllers: A case study in the MAHALO project	10.1145/3605390.3610822	https://doi.org/10.1145/3605390.3610822	include		exclude	yes
Moreira-Filho, José T.; Ranganath, Dhruv; Conway, Mike; Schmitt, Charles; Kleinstreuer, Nicole; Mansouri, Kamel	Democratizing cheminformatics: interpretable chemical grouping using an automated KNIME workflow.	10.1186/s13321-024-00894-1	https://link.springer.com/article/10.1186/s13321-024-00894-1	exclude			yes
Muna, Rabeya Khatun; Hossain, Muhammad Iqbal; Alam, Md Golam Rabiul; Hassan, Mohammad Mehedi; Ianni, Michele; Fortino, Giancarlo	Demystifying machine learning models of massive IoT attack detection with Explainable AI for sustainable and secure future smart cities	https://doi.org/10.1016/j.iot.2023.100919	https://www.sciencedirect.com/science/article/pii/S2542660523002421	include		exclude	yes
Sherry, Lance; Baldo, James; Berlin, Brett	Design of Flight Guidance and Control Systems Using Explainable AI	10.1109/ICNS52807.2021.9441577	https://ieeexplore.ieee.org/abstract/document/9441577?casa_token=DQftdQue1QMAAAAA:NFv2d3xjjWeiOpsz3s1aOV9MWVHAL9urFDY27WrbCgzJbZBHxUVUGib_EaBw6YSnU7lgmwwvrg	exclude			yes
Jaramillo, Byron; Loza-Aguirre, Edison; Terán, Luis	Designing a Framework for Explainable Health Recommender System Based on the Ecuadorian Data Protection Regulations	10.1109/ICEDEG58167.2023.10122066	https://ieeexplore.ieee.org/abstract/document/10122066?casa_token=g_Xp8xdPI7sAAAAA:DYfDAPaNYPy4kzgoEOwMu8FB9qa4QRRdAYFtT3nR1P9o1kxD2bCxeHP_L7o9hOFEZanGj8idIg	exclude			yes
Shen, Hong; Jin, Haojian; Cabrera, Ángel Alexander; Perer, Adam; Zhu, Haiyi; Hong, Jason I.	Designing Alternative Representations of Confusion Matrices to Support Non-Expert Public Understanding of Algorithm Performance	10.1145/3415224	https://doi.org/10.1145/3415224	exclude	not really xai, redesign of confusion matrices		yes
Szymanski, Maxwell; Vanden Abeele, Vero; Verbert, Katrien	Designing and Evaluating Explanations for a Predictive Health Dashboard: A User-Centred Case Study	10.1145/3613905.3637140	https://doi.org/10.1145/3613905.3637140	include		exclude	yes
Park, Sunyoung; Kim, Hyun K.; Park, Jaehyun; Lee, Yuryeon	Designing and Evaluating User Experience of an AI-Based Defense System	10.1109/ACCESS.2023.3329257	https://ieeexplore.ieee.org/abstract/document/10304133	include		exclude	yes		defense	image data
Guo, Lijie; Daly, Elizabeth M.; Alkan, Oznur; Mattetti, Massimiliano; Cornec, Owen; Knijnenburg, Bart	Building Trust in Interactive Machine Learning via User Contributed Interpretable Rules	10.1145/3490099.3511111	https://doi.org/10.1145/3490099.3511111	include		include		yes	game	tabular/image=	visualization	text explanation	lay users	199
Guo, Lijie; Daly, Elizabeth M.; Alkan, Oznur; Mattetti, Massimiliano; Cornec, Owen; Knijnenburg, Bart	Building Trust in Interactive Machine Learning via User Contributed Interpretable Rules	10.1145/3490099.3511111	https://doi.org/10.1145/3490099.3511111	include		include	yes	yes	game	tabular/image=	just explanation	interaction (feedback)	lay users	199
Hamm, Pascal, Klesel, Michael, Coberger, Patricia, Wittmann, H. Felix	Explanation matters: An experimental study on explainable AI	10.1007/s12525-023-00640-9	https://link.springer.com/article/10.1007/s12525-023-00640-9	include		include	yes	yes	fake signature detection	image data	no explanation	SHAP on images	lay users	79
Rubegni, Elisa, Ayoub, Omran, Rizzo, Stefania Maria Rita, Barbero, Marco, Bernegger, Guenda, Faraci, Francesca, Mangili, Francesca, Soldini, Emiliano, Trimboli, Pierpaolo, Facchini, Alessandro	Designing for Complementarity: A Conceptual Framework to Go Beyond the Current Paradigm of Using XAI in Healthcare	10.1007/978-3-031-60606-9_16	https://link.springer.com/chapter/10.1007/978-3-031-60606-9_16	exclude			yes
Oberste, Luis, Rüffer, Florian, Aydingül, Okan, Rink, Johann, Heinzl, Armin	Designing User-Centric Explanations for Medical Imaging with Informed Machine Learning	10.1007/978-3-031-32808-4_29	https://link.springer.com/chapter/10.1007/978-3-031-32808-4_29	include		exclude	yes
Shin, Jongkyung; Joung, Junegak; Lim, Chiehyeon	Determining directions of service quality management using online review mining with interpretable machine learning	https://doi.org/10.1016/j.ijhm.2023.103684	https://www.sciencedirect.com/science/article/pii/S027843192300258X	exclude			yes
Valdés, Julio J.; Tchagang, Alain B.	Deterministic Numeric Simulation and Surrogate Models with White and Black Machine Learning Methods: A Case Study on Inverse Mappings	10.1109/SSCI47803.2020.9308352	https://ieeexplore.ieee.org/abstract/document/9308352	exclude			yes
Lin, Frank Cheau-Feng; Wei, Chia-Jung; Bai, Zhe-Rui; Chang, Chi-Chang; Chiu, Ming-Chuan	Developing an explainable diagnosis system utilizing deep learning model: a case study of spontaneous pneumothorax.	10.1088/1361-6560/ad5e31	https://iopscience.iop.org/article/10.1088/1361-6560/ad5e31/meta	exclude			yes
Hassan, Fayaz; Yu, Jianguo; Syed, Zafi Sherhan; Magsi, Arif Hussain; Ahmed, Nadeem	Developing Transparent IDS for VANETs Using LIME and SHAP: An Empirical Study	https://doi.org/10.32604/cmc.2023.044650	https://www.sciencedirect.com/science/article/pii/S1546221823006859	exclude			yes
Hegselmann, Stefan; Ertmer, Christian; Volkert, Thomas; Gottschalk, Antje; Dugas, Martin; Varghese, Julian	Development and validation of an interpretable 3 day intensive care unit readmission prediction model using explainable boosting machines.	10.3389/fmed.2022.960296	https://www.frontiersin.org/journals/medicine/articles/10.3389/fmed.2022.960296/full	exclude			yes
Arrotta, Luca; Civitarese, Gabriele; Bettini, Claudio	DeXAR: Deep Explainable Sensor-Based Activity Recognition in Smart-Home Environments	10.1145/3517224	https://doi.org/10.1145/3517224	include		exclude	yes
Ribeiro, Tony, Folschette, Maxime, Magnin, Morgan, Okazaki, Kotaro, Kuo-Yen, Lo, Inoue, Katsumi	Diagnosis of Event Sequences with LFIT	10.1007/978-3-031-55630-2_9	https://link.springer.com/chapter/10.1007/978-3-031-55630-2_9	include		exclude	yes
Xu, Yifan	Dialogue Explanation With Reasoning for AI	10.1145/3514094.3539522	https://doi.org/10.1145/3514094.3539522	exclude			yes
Xu, Yifan, Collenette, Joe, Dennis, Louise, Dixon, Clare	Dialogue Explanations for Rule-Based AI Systems	10.1007/978-3-031-40878-6_4	https://link.springer.com/chapter/10.1007/978-3-031-40878-6_4	include		exclude	yes
Watanabe, Naoki; Kuriya, Yuki; Murata, Masahiro; Yamamoto, Masaki; Shimizu, Masayuki; Araki, Michihiro	Different Recognition of Protein Features Depending on Deep Learning Models: A Case Study of Aromatic Decarboxylase UbiD.	10.3390/biology12060795	https://www.mdpi.com/2079-7737/12/6/795	exclude			yes
Pezoulas, Vasileios C.; Ehret, Georg; Bosch, Jos; Fotiadis, Dimitrios I.; Sakellarios, Antonis	Distilling knowledge from high quality biobank data towards the discovery of risk factors for patients with cardiovascular diseases and depression	10.1109/BHI58575.2023.10313449	https://ieeexplore.ieee.org/abstract/document/10313449?casa_token=3kyd9VXDF1AAAAAA:BpJvaTo_LjzwIRRb17zgS7F80HeSrUPPCryTC_-c9rtmvVSY5wZaNdEwO57cajSWy1K6FRUxShg	exclude			yes
Oyekanlu, Emmanuel	Distributed Osmotic Computing Approach to Implementation of Explainable Predictive Deep Learning at Industrial IoT Network Edges with Real-Time Adaptive Wavelet Graphs	10.1109/AIKE.2018.00042	https://ieeexplore.ieee.org/abstract/document/8527474	exclude			yes
Joo, Hyungjun; Kim, Jaemyung; Han, Hyeonggeun; Lee, Jungwoo	Distributional Prototypical Methods for Reliable Explanation Space Construction	10.1109/ACCESS.2023.3264794	https://ieeexplore.ieee.org/abstract/document/10092737	include		exclude	yes
Morais, Fábio Luiz D.; Garcia, Ana Cristina B.; Dos Santos, Paulo Sérgio M.; Ribeiro, Luiz Alberto P. A.	Do Explainable AI techniques effectively explain their rationale? A case study from the domain expert’s perspective	10.1109/CSCWD57460.2023.10152722	https://ieeexplore.ieee.org/abstract/document/10152722?casa_token=46dTsrUNnW0AAAAA:CYXoy_KTKVNWg3jTdEfwhcVtc-wua_a5YemZiGEk891OFkfo3bJqhm4Nygfl0fan5v48mIauGw	include		exclude	yes		healthcare
Vasalou, Asimina; Benton, Laura; Serta, Ana; Gauthier, Andrea; Besevli, Ceylan; Turner, Sarah; Gill, Rea; Payler, Rachael; Roesch, Etienne; McAreavey, Kevin; Bauters, Kim; Liu, Weiru; Chen, Hsueh-Ju; Ivory, Dennis; Panaousis, Manos; Loukas, Georgios	Doing cybersecurity at home: A human-centred approach for mitigating attacks in AI-enabled home devices	https://doi.org/10.1016/j.cose.2024.104112	https://www.sciencedirect.com/science/article/pii/S0167404824004176	exclude			yes
Chow, Theo; Kan, Zeliang; Linhardt, Lorenz; Cavallaro, Lorenzo; Arp, Daniel; Pierazzi, Fabio	Drift Forensics of Malware Classifiers	10.1145/3605764.3623918	https://doi.org/10.1145/3605764.3623918	exclude			yes
Kamal, Sadia; Sharma, Parth; Gupta, P. K.; Siddiqui, Mohammad Khubeb; Singh, Ankush; Dutt, Abhijit	DVTXAI: a novel deep vision transformer with an explainable AI-based framework and its application in agriculture	10.1007/s11227-024-06494-y	https://link.springer.com/10.1007/s11227-024-06494-y	exclude			yes
Fukuchi, Yosuke; Yamada, Seiji	Dynamic Selection of Reliance Calibration Cues With AI Reliance Model	10.1109/ACCESS.2023.3339548	https://ieeexplore.ieee.org/abstract/document/10343151	include		exclude	yes
Chugh, Kartik; Solis, Andrea Y.; LaToza, Thomas D.	Editable AI: Mixed Human-AI Authoring of Code Patterns	10.1109/VLHCC.2019.8818871	https://ieeexplore.ieee.org/abstract/document/8818871?casa_token=b7TutM-zBtgAAAAA:DpvIM2fStGtAOj9n7LVT6PUdFkxsTxxSLwYwXmGzUs3qBkldIrB_twBapmAq4yXqEyujRum5gv0	include		exclude	yes
Vojíř, Stanislav, Kliegr, Tomáš	Editable machine learning models? A rule-based framework for user studies of explainability	10.1007/s11634-020-00419-2	https://link.springer.com/article/10.1007/s11634-020-00419-2	exclude			yes
Herm, Lukas-Valentin; Heinrich, Kai; Wanner, Jonas; Janiesch, Christian	Stop ordering machine learning algorithms by their explainability! A user-centered investigation of performance and explainability	https://doi.org/10.1016/j.ijinfomgt.2022.102538	https://www.sciencedirect.com/science/article/pii/S026840122200072X	include		include	yes	yes	healthcare	image data	How	How-To	lay users	98																																			***+
Herm, Lukas-Valentin; Heinrich, Kai; Wanner, Jonas; Janiesch, Christian	Stop ordering machine learning algorithms by their explainability! A user-centered investigation of performance and explainability	https://doi.org/10.1016/j.ijinfomgt.2022.102538	https://www.sciencedirect.com/science/article/pii/S026840122200072X	include		include		yes	healthcare	image data	no explanation	How-To	lay users	98																																			***+
Schallner, Ludwig, Rabold, Johannes, Scholz, Oliver, Schmid, Ute	Effect of Superpixel Aggregation on Explanations in LIME – A Case Study with Biological Data	10.1007/978-3-030-43823-4_13	https://link.springer.com/chapter/10.1007/978-3-030-43823-4_13	exclude			yes
Herm, Lukas-Valentin; Heinrich, Kai; Wanner, Jonas; Janiesch, Christian	Stop ordering machine learning algorithms by their explainability! A user-centered investigation of performance and explainability	https://doi.org/10.1016/j.ijinfomgt.2022.102538	https://www.sciencedirect.com/science/article/pii/S026840122200072X	include		include		yes	healthcare	image data	How	What-Else	lay users	98																																			***+
Wang, Xinru; Yin, Ming	Effects of Explanations in AI-Assisted Decision Making: Principles and Comparisons	10.1145/3519266	https://doi.org/10.1145/3519266	include		exclude	yes		recidivism prediction	tabular data	no explanation	feature importance (global)	domain experts	782
Wang, Xinru; Yin, Ming	Effects of Explanations in AI-Assisted Decision Making: Principles and Comparisons	10.1145/3519266	https://doi.org/10.1145/3519266	include		exclude			recidivism prediction	tabular data	no explanation	feature contribution	domain experts	782
Wang, Xinru; Yin, Ming	Effects of Explanations in AI-Assisted Decision Making: Principles and Comparisons	10.1145/3519266	https://doi.org/10.1145/3519266	include		exclude			recidivism prediction	tabular data	no explanation	nearest neighbors	domain experts	782
Wang, Xinru; Yin, Ming	Effects of Explanations in AI-Assisted Decision Making: Principles and Comparisons	10.1145/3519266	https://doi.org/10.1145/3519266	include		exclude			recidivism prediction	tabular data	no explanation	couterfactual	domain experts	782
Wang, Xinru; Yin, Ming	Effects of Explanations in AI-Assisted Decision Making: Principles and Comparisons	10.1145/3519266	https://doi.org/10.1145/3519266	include		exclude			forest cover prediction	tabular data	no explanation	feature importance (global)	lay users	561
Wang, Xinru; Yin, Ming	Effects of Explanations in AI-Assisted Decision Making: Principles and Comparisons	10.1145/3519266	https://doi.org/10.1145/3519266	include		exclude			forest cover prediction	tabular data	no explanation	feature contribution	lay users	561
Wang, Xinru; Yin, Ming	Effects of Explanations in AI-Assisted Decision Making: Principles and Comparisons	10.1145/3519266	https://doi.org/10.1145/3519266	include		exclude			forest cover prediction	tabular data	no explanation	nearest neighbors	lay users	561
Wang, Xinru; Yin, Ming	Effects of Explanations in AI-Assisted Decision Making: Principles and Comparisons	10.1145/3519266	https://doi.org/10.1145/3519266	include		exclude			forest cover prediction	tabular data	no explanation	couterfactual	lay users	561
Pramanick, Pradip; Raggioli, Luca; Rossi, Alessandra; Rossi, Silvia	Effects of Incoherence in Multimodal Explanations of Robot Failures	10.1145/3686215.3690155	https://doi.org/10.1145/3686215.3690155	include		exclude	yes
Nielsen, Aileen; Skylaki, Stavroula; Norkute, Milda; Stremitzer, Alexander	Effects of XAI on Legal Process	10.1145/3594536.3595128	https://doi.org/10.1145/3594536.3595128	include		exclude	yes
Ravi, Sandipp Krishnan; Roy, Indranil; Roychowdhury, Subhrajit; Feng, Bojun; Ghosh, Sayan; Reynolds, Christopher; Umretiya, Rajnikant V.; Rebak, Raul B.; Hoffman, Andrew K.	Elucidating precipitation in FeCrAl alloys through explainable AI: A case study	https://doi.org/10.1016/j.commatsci.2023.112440	https://www.sciencedirect.com/science/article/pii/S0927025623004342	exclude			yes
Pi, Yulu	Empowering Individuals in Automated Decision-Making: Explainability, Contestability and Beyond	10.1145/3678884.3682043	https://doi.org/10.1145/3678884.3682043	exclude			yes
Kay, Judy	Empowering People to Harness and Control their Multimodal Data in Scrutable User models	10.1145/3664647.3680509	https://doi.org/10.1145/3664647.3680509	exclude			yes
Hesham Morgan, Ali Elgendy, Amir Said, Mostafa Hashem, Wenzhao Li, et al.	Enhanced Lithological Mapping in Arid Crystalline Regions Using Explainable AI and Multi-spectral Remote Sensing Data	10.1016/j.cageo.2024.105738	http://digitalcommons.chapman.edu/scs_articles/1070	exclude			yes
Bobek, Szymon; Kuk, Michal; Szelążek, Maciej; Nalepa, Grzegorz J.	Enhancing Cluster Analysis With Explainable AI and Multidimensional Cluster Prototypes	10.1109/ACCESS.2022.3208957	https://ieeexplore.ieee.org/abstract/document/9900312	exclude			yes
Helen Sheridan, Dympna O'Sullivan, Emma Murphy	Enhancing Early-Stage XAI Projects Through Designer-Led Visual Ideation of AI Concepts	10.1007/978-3-031-47721-8_41	http://arrow.tudublin.ie/diraabk/6	exclude			yes
Wu, Yaoyang; Fong, Simon; Liu, Liansheng	Enhancing explainability in medical image classification and analyzing osteonecrosis X-ray images using shadow learner system	10.1007/s10489-024-05916-x	https://link.springer.com/10.1007/s10489-024-05916-x	exclude			yes
Bulut, Okan, Wongvorachan, Tarid, He, Surina, Lee, Soo	Enhancing high-school dropout identification: a collaborative approach integrating human and machine insights	10.1007/s44217-024-00209-4	https://link.springer.com/article/10.1007/s44217-024-00209-4	exclude			yes
Sutiene, Kristina; Schwendner, Peter; Sipos, Ciprian; Lorenzo, Luis; Mirchev, Miroslav; Lameski, Petre; Kabasinskas, Audrius; Tidjani, Chemseddine; Ozturkkal, Belma; Cerneviciene, Jurgita	Enhancing portfolio management using artificial intelligence: literature review.	10.3389/frai.2024.1371502	https://www.frontiersin.org/journals/artificial-intelligence/articles/10.3389/frai.2024.1371502/full	include		exclude	yes
matthew david, William Jones, Hayley Horn	Enhancing SHAP With Multi-Core Parallelization and Distributed Computation	10.1109/icde.2015.7113358	http://scholar.smu.edu/datasciencereview/vol8/iss2/1	exclude			yes
Sarker, Md Al Amin; Shanmugam, Bharanidharan; Azam, Sami; Thennadil, Suresh	Enhancing smart grid load forecasting: An attention-based deep learning model integrated with federated learning and XAI for security and interpretability	https://doi.org/10.1016/j.iswa.2024.200422	https://www.sciencedirect.com/science/article/pii/S2667305324000966	exclude			yes
Gao, Weizhi; Liao, Yaoxing; Chen, Yuhong; Lai, Chengguang; He, Sijing; Wang, Zhaoli	Enhancing transparency in data-driven urban pluvial flood prediction using an explainable CNN model	https://doi.org/10.1016/j.jhydrol.2024.132228	https://www.sciencedirect.com/science/article/pii/S002216942401624X	exclude			yes
Attig, Christiane, Schrills, Tim, Gödker, Markus, Wollstadt, Patricia, Wiebel-Herboth, Christiane, Calero Valdez, André, Franke, Thomas	Enhancing Trust in Smart Charging Agents—The Role of Traceability for Human-Agent-Cooperation	10.1007/978-3-031-48057-7_19	https://link.springer.com/chapter/10.1007/978-3-031-48057-7_19	include		exclude	yes
Nematzadeh, Hossein; García-Nieto, José; Navas-Delgado, Ismael; Aldana-Montes, José F.	Ensemble-based genetic algorithm explainer with automized image segmentation: A case study on melanoma detection dataset	https://doi.org/10.1016/j.compbiomed.2023.106613	https://www.sciencedirect.com/science/article/pii/S0010482523000781	exclude			yes
Nematzadeh, Hossein; García-Nieto, José; Navas-Delgado, Ismael; Aldana-Montes, José F.	Ensemble-based genetic algorithm explainer with automized image segmentation: A case study on melanoma detection dataset.	10.1016/j.compbiomed.2023.106613	https://www.sciencedirect.com/science/article/pii/S0010482523000781	exclude			yes
Kim, Sunnie S. Y.	Establishing Appropriate Trust in AI through Transparency and Explainability	10.1145/3613905.3638184	https://doi.org/10.1145/3613905.3638184	include		exclude	yes
Dash, Saloni; Balasubramanian, Vineeth N; Sharma, Amit	Evaluating and Mitigating Bias in Image Classifiers: A Causal Perspective Using Counterfactuals	10.1109/WACV51458.2022.00393	https://openaccess.thecvf.com/content/WACV2022/html/Dash_Evaluating_and_Mitigating_Bias_in_Image_Classifiers_A_Causal_Perspective_WACV_2022_paper.html	exclude			yes
Shi, Yiwei; McAreavey, Kevin; Liu, Weiru	Evaluating contrastive explanations for AI planning with non-experts: a smart home battery scenario	10.1109/ICAC55051.2022.9911125	https://ieeexplore.ieee.org/abstract/document/9911125?casa_token=cgQJNhBgW4sAAAAA:-VBixPwRnJakEbWhmQOHBtyHMoe60ST4LXVgtB6x5tYE9cQQsQCATC8H3XOVIzG8S8yx2I88dw	include		exclude	yes
E Ihongbe, Izegbua; Fouad, Shereen; F Mahmoud, Taha; Rajasekaran, Arvind; Bhatia, Bahadar	Evaluating Explainable Artificial Intelligence (XAI) techniques in chest radiology imaging through a human-centered Lens.	10.1371/journal.pone.0308758	https://journals.plos.org/plosone/article?id=10.1371/journal.pone.0308758	include		exclude	yes		healthcare	image data	no controll group	GradCAM	domain experts	25
E Ihongbe, Izegbua; Fouad, Shereen; F Mahmoud, Taha; Rajasekaran, Arvind; Bhatia, Bahadar	Evaluating Explainable Artificial Intelligence (XAI) techniques in chest radiology imaging through a human-centered Lens.	10.1371/journal.pone.0308758	https://journals.plos.org/plosone/article?id=10.1371/journal.pone.0308758	include		exclude			healthcare	image data	no controll group	LIME	domain experts	25
E Ihongbe, Izegbua; Fouad, Shereen; F Mahmoud, Taha; Rajasekaran, Arvind; Bhatia, Bahadar	Evaluating Explainable Artificial Intelligence (XAI) techniques in chest radiology imaging through a human-centered Lens.	10.1371/journal.pone.0308758	https://journals.plos.org/plosone/article?id=10.1371/journal.pone.0308758	include		exclude			healthcare	image data	LIME	GradCAM	domain experts	25
Vareille, Etienne; Abbas, Adel; Linardi, Michele; Christophides, Vassilis	Evaluating Explanation Methods of Multivariate Time Series Classification through Causal Lenses	10.1109/DSAA60987.2023.10302482	https://ieeexplore.ieee.org/abstract/document/10302482?casa_token=-i5C0q_nLUYAAAAA:GaLjnbzHdj5wLAoTpO8rhbjFJfp4KwDMN3C0o5Kw4MohY-Dbd4p5YDWLBZTRJOvx2p2Ok67FFw	include		exclude	yes
Ghanvatkar, Suparna; Rajan, Vaibhav	Evaluating Explanations From AI Algorithms for Clinical Decision-Making: A Social Science-Based Approach.	10.1109/JBHI.2024.3393719	https://ieeexplore.ieee.org/abstract/document/10508367?casa_token=FjvR6bTIiBAAAAAA:2VfbgG3mD2SK1jNU4Sxyym9XTMBPhktxZ2zFJezQ3Rgz5vc4IZIoWrSvT--jByM9v5JTxZILJQ	exclude			yes
Karagoz, Gizem, Kollenburg, Geert, Ozcelebi, Tanir, Meratnia, Nirvana	Evaluating How Explainable AI Is Perceived in the Medical Domain: A Human-Centered Quantitative Study of XAI in Chest X-Ray Diagnostics	10.1007/978-3-031-67751-9_8	https://link.springer.com/chapter/10.1007/978-3-031-67751-9_8	include		exclude	yes
Hakkoum, Hajar; Abnane, Ibtissam; Idri, Ali	Evaluating Interpretability of Multilayer Perceptron and Support Vector Machines for Breast Cancer Classification	10.1109/AICCSA56895.2022.10017521	https://ieeexplore.ieee.org/abstract/document/10017521?casa_token=ThFmSBhK48AAAAAA:od8iD7dgUD65PkIzy0ir2bASwHTadfi2TvZD2NlQSUQtsd2LmHCXcJVFqaiQdeVyBNMIT9CPQA	include		exclude	yes
Mercier, Dominique; Lucieri, Adriano; Munir, Mohsin; Dengel, Andreas; Ahmed, Sheraz	Evaluating Privacy-Preserving Machine Learning in Critical Infrastructures: A Case Study on Time-Series Classification	10.1109/TII.2021.3124476	https://ieeexplore.ieee.org/abstract/document/9612016?casa_token=tWZY0Es5rgYAAAAA:f8xSiRuQwWfkw5XZB62pSba1Y6l5gC9j1eojUfJNAKgVUdx3owmzVbcynISwzsAoj8CIH-hj0w	exclude			yes
Dey, Aditya; Radhakrishna, Chandan; Lima, Nishitha Nancy; Shashidhar, Suraj; Polley, Sayantan; Thiel, Marcus; Nürnberger, Andreas	Evaluating Reliability in Explainable Search	10.1109/ICHMS53169.2021.9582653	https://ieeexplore.ieee.org/abstract/document/9582653?casa_token=32l0fCA709IAAAAA:aGLJCZYidncNvCWplUyMECtHJMJdhVK8DMbgnsX1ZKaOL4OABV7JUd1IBC51CwIJ1VCKyUV05A	include		exclude	yes
Herm, Lukas-Valentin; Heinrich, Kai; Wanner, Jonas; Janiesch, Christian	Stop ordering machine learning algorithms by their explainability! A user-centered investigation of performance and explainability	https://doi.org/10.1016/j.ijinfomgt.2022.102538	https://www.sciencedirect.com/science/article/pii/S026840122200072X	include		include		yes	healthcare	image data	How-To	What-Else	lay users	98																																			***+
Chen, Catherine; Eickhoff, Carsten	Evaluating Search System Explainability with Psychometrics and Crowdsourcing	10.1145/3626772.3657796	https://doi.org/10.1145/3626772.3657796	include		exclude	yes
Oprea, Camelia; Grüne, Mike; Buglowski, Mateusz; Olivier, Lena; Orlikowsky, Thorsten; Kowalewski, Stefan; Schoberer, Mark; Stollenwerk, André	Evaluating the Explainable AI Method Grad-CAM for Breath Classification on Newborn Time Series Data	https://doi.org/10.1016/j.ifacol.2024.11.023	https://www.sciencedirect.com/science/article/pii/S2405896324021505	include		exclude	yes
Wardatzky, Kathrin	Evaluating the Pros and Cons of Recommender Systems Explanations	10.1145/3640457.3688011	https://doi.org/10.1145/3640457.3688011	exclude			yes
Gallée, Luisa, Lisson, Catharina Silvia, Lisson, Christoph Gerhard, Drees, Daniela, Weig, Felix, Vogele, Daniel, Beer, Meinrad, Götz, Michael	Evaluating the Explainability of Attributes and Prototypes for a Medical Classification Model	10.1007/978-3-031-63787-2_3	https://link.springer.com/chapter/10.1007/978-3-031-63787-2_3	include		exclude	yes		healthcare	image data	no explanation	attribute scores + prototypes	domain experts	6
Herm, Lukas-Valentin; Heinrich, Kai; Wanner, Jonas; Janiesch, Christian	Stop ordering machine learning algorithms by their explainability! A user-centered investigation of performance and explainability	https://doi.org/10.1016/j.ijinfomgt.2022.102538	https://www.sciencedirect.com/science/article/pii/S026840122200072X	include		include		yes	healthcare	image data	no explanation	What-Else	lay users	98																																			***+
Marques, Julliana Gonçalves; Guedes, Luiz Affonso; da Costa Abreu, Márjory Cristiany	Evaluating Time Influence over Performance of Machine-Learning-Based Diagnosis: A Case Study of COVID-19 Pandemic in Brazil.	10.3390/ijerph20010136	https://www.mdpi.com/1660-4601/20/1/136	include		exclude	yes
Herm, Lukas-Valentin; Heinrich, Kai; Wanner, Jonas; Janiesch, Christian	Stop ordering machine learning algorithms by their explainability! A user-centered investigation of performance and explainability	https://doi.org/10.1016/j.ijinfomgt.2022.102538	https://www.sciencedirect.com/science/article/pii/S026840122200072X	include		include		yes	healthcare	image data	How	Why	lay users	98																																			***+
Herm, Lukas-Valentin; Heinrich, Kai; Wanner, Jonas; Janiesch, Christian	Stop ordering machine learning algorithms by their explainability! A user-centered investigation of performance and explainability	https://doi.org/10.1016/j.ijinfomgt.2022.102538	https://www.sciencedirect.com/science/article/pii/S026840122200072X	include		include		yes	healthcare	image data	How-To	Why	lay users	98																																			***+
Torres, Juan Manuel Mayor; Medina-DeVilliers, Sara; Clarkson, Tessa; Lerner, Matthew D.; Riccardi, Giuseppe	Evaluation of interpretability for deep learning algorithms in EEG emotion recognition: A case study in autism	https://doi.org/10.1016/j.artmed.2023.102545	https://www.sciencedirect.com/science/article/pii/S0933365723000593	exclude			yes
Mayor Torres, Juan Manuel; Medina-DeVilliers, Sara; Clarkson, Tessa; Lerner, Matthew D.; Riccardi, Giuseppe	Evaluation of interpretability for deep learning algorithms in EEG emotion recognition: A case study in autism.	10.1016/j.artmed.2023.102545	https://www.sciencedirect.com/science/article/abs/pii/S0933365723000593	exclude			yes
Prasad, Rendhir R.; Rejimol Robinson, R. R.; Thomas, Ciza; Balakrishnan, N.	Evaluation of Strategic Decision taken by Autonomous Agent using Explainable AI	10.1109/ISEA-ISAP54304.2021.9689715	https://ieeexplore.ieee.org/abstract/document/9689715	exclude			yes
Herm, Lukas-Valentin; Heinrich, Kai; Wanner, Jonas; Janiesch, Christian	Stop ordering machine learning algorithms by their explainability! A user-centered investigation of performance and explainability	https://doi.org/10.1016/j.ijinfomgt.2022.102538	https://www.sciencedirect.com/science/article/pii/S026840122200072X	include		include		yes	healthcare	image data	no explanation	Why	lay users	98																																			***+
Herm, Lukas-Valentin; Heinrich, Kai; Wanner, Jonas; Janiesch, Christian	Stop ordering machine learning algorithms by their explainability! A user-centered investigation of performance and explainability	https://doi.org/10.1016/j.ijinfomgt.2022.102538	https://www.sciencedirect.com/science/article/pii/S026840122200072X	include		include		yes	healthcare	image data	Why Not	Why	lay users	98																																			***-
Kayser, Maxime; Camburu, Oana-Maria; Salewski, Leonard; Emde, Cornelius; Do, Virginie; Akata, Zeynep; Lukasiewicz, Thomas	e-ViL: A Dataset and Benchmark for Natural Language Explanations in Vision-Language Tasks	10.1109/ICCV48922.2021.00128	https://openaccess.thecvf.com/content/ICCV2021/html/Kayser_E-ViL_A_Dataset_and_Benchmark_for_Natural_Language_Explanations_in_ICCV_2021_paper.html	exclude	no user study		yes
Chou, Yao-Hsin; Hua, Cheng-Yen; Kuo, Shu-Yu; Jiang, Yu-Chi; Kuo, Sy-Yen	Evo-Panel: Dynamic Visualization Tool for Optimization Process	10.1145/3638530.3664079	https://doi.org/10.1145/3638530.3664079	exclude			yes
Metta, Carlo; Guidotti, Riccardo; Yin, Yuan; Gallinari, Patrick; Rinzivillo, Salvatore	Exemplars and Counterexemplars Explanations for Image Classifiers, Targeting Skin Lesion Labeling	10.1109/ISCC53001.2021.9631485	https://ieeexplore.ieee.org/abstract/document/9631485?casa_token=TaK5so3KI5IAAAAA:UnNqak0xSfWBmFdX-MUcJgpBXtmrpkacD_BnZvKIb2qtfACCSSWPsi5SfTWs9-_vHcVUFZTvhA	exclude			yes
Alonso, Jose M.; Toja-Alamancos, J.; Bugarín, A.	Experimental Study on Generating Multi-modal Explanations of Black-box Classifiers in terms of Gray-box Classifiers	10.1109/FUZZ48607.2020.9177770	https://ieeexplore.ieee.org/abstract/document/9177770?casa_token=VbtqCXisB-QAAAAA:5qeK5HHU8f6mfpTX7KiwT-8Xzz2Q4SRFVuMo8PuuIgkmDpKRlrRnaWdwbGk-1kCpTM63Nq5gvg	exclude	no user study		yes
Łajewska, Weronika; Spina, Damiano; Trippas, Johanne; Balog, Krisztian	Explainability for Transparent Conversational Information-Seeking	10.1145/3626772.3657768	https://doi.org/10.1145/3626772.3657768	include		exclude	yes
Manger, Carina; Pusch, Florian; Thöne, Manuel; Wenger, Marco; Löcken, Andreas; Riener, Andreas	Explainability in Automated Parking: The Effect of Augmented Reality Visualizations on User Experience and Situation Awareness	10.1145/3626705.3627796	https://doi.org/10.1145/3626705.3627796	include		exclude	yes
Arefi, Arman; Sturm, Barbara; Hoffmann, Thomas	Explainability of deep convolutional neural networks when it comes to NIR spectral data: A case study of starch content estimation in potato tubers	https://doi.org/10.1016/j.foodcont.2024.110979	https://www.sciencedirect.com/science/article/pii/S0956713524006960	exclude			yes
Ehsan, Upol; Riedl, Mark O.	Explainability pitfalls: Beyond dark patterns in explainable AI.	10.1016/j.patter.2024.100971	https://www.sciencedirect.com/science/article/pii/S2666389924000795	exclude			yes
Wolf, Christine T.	Explainability scenarios: towards scenario-based XAI design	10.1145/3301275.3302317	https://doi.org/10.1145/3301275.3302317	include		exclude	yes
Thuy, Arthur; Benoit, Dries F.	Explainability through uncertainty: Trustworthy decision-making with neural networks	https://doi.org/10.1016/j.ejor.2023.09.009	https://www.sciencedirect.com/science/article/pii/S0377221723007105	exclude			yes
Ghai, Bhavya; Liao, Q. Vera; Zhang, Yunfeng; Bellamy, Rachel; Mueller, Klaus	Explainable Active Learning (XAL): Toward AI Explanations as Interfaces for Machine Teachers	10.1145/3432934	https://doi.org/10.1145/3432934	include		exclude	yes
Ben David, Daniel; Resheff, Yehezkel S.; Tron, Talia	Explainable AI and Adoption of Financial Algorithmic Advisors: An Experimental Study	10.1145/3461702.3462565	https://doi.org/10.1145/3461702.3462565	include		exclude	yes
Vishwarupe, Varad; Joshi, Prachi M.; Mathias, Nicole; Maheshwari, Shrey; Mhaisalkar, Shweta; Pawar, Vishal	Explainable AI and Interpretable Machine Learning: A Case Study in Perspective	https://doi.org/10.1016/j.procs.2022.08.105	https://www.sciencedirect.com/science/article/pii/S1877050922008432	exclude	no user study		yes
Herm, Lukas-Valentin; Heinrich, Kai; Wanner, Jonas; Janiesch, Christian	Stop ordering machine learning algorithms by their explainability! A user-centered investigation of performance and explainability	https://doi.org/10.1016/j.ijinfomgt.2022.102538	https://www.sciencedirect.com/science/article/pii/S026840122200072X	include		include		yes	healthcare	image data	How	Why-Not	lay users	98																																			***+
Herm, Lukas-Valentin; Heinrich, Kai; Wanner, Jonas; Janiesch, Christian	Stop ordering machine learning algorithms by their explainability! A user-centered investigation of performance and explainability	https://doi.org/10.1016/j.ijinfomgt.2022.102538	https://www.sciencedirect.com/science/article/pii/S026840122200072X	include		include		yes	healthcare	image data	no explanation	Why-Not	lay users	98																																			***+
Rasaee, Hamza; Rivaz, Hassan	Explainable AI and susceptibility to adversarial attacks: a case study in classification of breast ultrasound images	10.1109/IUS52206.2021.9593490	https://ieeexplore.ieee.org/abstract/document/9593490?casa_token=b8i1JTumqGEAAAAA:-7xSy8G1tx9wSXKGakpWWCNBMroNYtafZf_mYGbhMVvE-D5a45_9Ab-rD24ZsuU6Jm_Isu5t8w	exclude			yes
Lee, Shou-Yu; Chu, William Cheng-Chung; Tseng, Yao-Hsien; Zhang, You-Gang; Tsai, Hung-Lung	Explainable AI Applied in Healthcare: A Case Study of Diabetes Prediction	10.1109/QRS-C63300.2024.00050	https://ieeexplore.ieee.org/abstract/document/10726946?casa_token=Qd1jhy4qdnQAAAAA:dBx8_BEaXxJJFBmoNj4Ro9iaMtekVC7S18wMMyC1_cJeX9NjSILiJb3LkmejgbmDfx7FgE2nSg	exclude	no user study		yes
Sargsyan, Anahit, Karapetyan, Areg, Woon, Wei Lee, Alshamsi, Aamena	Explainable AI as a Social Microscope: A Case Study on Academic Performance	10.1007/978-3-030-64583-0_24	https://link.springer.com/chapter/10.1007/978-3-030-64583-0_24	exclude			yes
Suffian, Muhammad	Explainable AI Assisted Decision-Making and Human Behaviour	10.1007/978-3-031-53717-2_36	https://link.springer.com/chapter/10.1007/978-3-031-53717-2_36	include		exclude	yes
Tappan, Isaly; Lindbeck, Erica M.; Nichols, Jennifer A.; Harley, Joel B.	Explainable AI Elucidates Musculoskeletal Biomechanics: A Case Study Using Wrist Surgeries.	10.1007/s10439-023-03394-9	https://link.springer.com/article/10.1007/s10439-023-03394-9	exclude	no user study		yes
Patni, Sakshi; Lee, Joohyung	Explainable AI Empowered Resource Management for Enhanced Communication Efficiency in Hierarchical Federated Learning	https://doi.org/10.1016/j.compeleceng.2024.109260	https://www.sciencedirect.com/science/article/pii/S0045790624001885	exclude			yes
Shen Wang, M. Atif Qureshi, Luis Miralles-Pechu{\'a}n, Thien Huynh-The, Thippa Reddy Gadekallu, et al.	Explainable AI for 6G Use Cases: Technical Aspects and Research Challenges	10.1109/ojcoms.2024.3386872	http://arrow.tudublin.ie/creaart/240	exclude			yes
Feldkamp, Niclas; Genath, Jonas; Strassburger, Steffen	Explainable AI for Data Farming Output Analysis: A Use Case for Knowledge Generation through Black-Box Classifiers	10.1109/WSC57314.2022.10015304	https://ieeexplore.ieee.org/abstract/document/10015304?casa_token=YtsqkGCcaP0AAAAA:-6vdP6vNmE6E7XdIEi9OrmDVIKlbSfko9UCbuN-IReMC5OaF4e1fj3_QCD4_YLgmqtlc9F0zTQg	exclude			yes
Acharjee, Animesh	Explainable AI for gut microbiome-based diagnostics: colorectal cancer as a case study.	10.1515/dx-2023-0062	https://www.degruyter.com/document/doi/10.1515/dx-2023-0062/html	exclude			yes
Saraswat, Deepti; Bhattacharya, Pronaya; Verma, Ashwin; Prasad, Vivek Kumar; Tanwar, Sudeep; Sharma, Gulshan; Bokoro, Pitshou N.; Sharma, Ravi	Explainable AI for Healthcare 5.0: Opportunities and Challenges	10.1109/ACCESS.2022.3197671	https://ieeexplore.ieee.org/abstract/document/9852458	exclude			yes
Trivedi, Chandan; Bhattacharya, Pronaya; Prasad, Vivek Kumar; Patel, Viraj; Singh, Arunendra; Tanwar, Sudeep; Sharma, Ravi; Aluvala, Srinivas; Pau, Giovanni; Sharma, Gulshan	Explainable AI for Industry 5.0: Vision, Architecture, and Potential Directions	10.1109/OJIA.2024.3399057	https://ieeexplore.ieee.org/abstract/document/10526434	exclude	no user study, review		yes
Karpouzis, Kostas	Explainable AI for Intelligent Tutoring Systems	10.1007/978-981-99-9836-4_6	https://link.springer.com/chapter/10.1007/978-981-99-9836-4_6	exclude			yes
Wagle, Vidisha; Kaur, Kulveen; Kamat, Pooja; Patil, Shruti; Kotecha, Ketan	Explainable AI for Multimodal Credibility Analysis: Case Study of Online Beauty Health (Mis)-Information	10.1109/ACCESS.2021.3111527	https://ieeexplore.ieee.org/abstract/document/9531594	exclude			yes
Das, Devleena; Banerjee, Siddhartha; Chernova, Sonia	Explainable AI for Robot Failures: Generating Explanations that Improve User Assistance in Fault Recovery	10.1145/3434073.3444657	https://doi.org/10.1145/3434073.3444657	include		exclude	yes
Vucenovic, Alexander; Ali-Ozkan, Osama; Ekwempe, Clifford; Eren, Ozgur	Explainable AI in Decision Support Systems : A Case Study: Predicting Hospital Readmission Within 30 Days of Discharge	10.1109/CCECE47787.2020.9255721	https://ieeexplore.ieee.org/abstract/document/9255721?casa_token=qRqBBOlU-A4AAAAA:WbIgZ4Mtw_2bm2WPJ2aIIrAhI0P01-_AcjaMKKi1jdtSZnLo8AXLVy5ixY7BtPgg7sIdbHXxFw	exclude			yes
Liu, Qinyi; Khalil, Mohammad	Explainable AI in Learning Analytics: Improving Predictive Models and Advancing Transparency Trust	10.1109/EDUCON60312.2024.10578733	https://ieeexplore.ieee.org/abstract/document/10578733?casa_token=apY4K5u6ICYAAAAA:FCSzS6b1v8kWmwvCtOqELSwCIX_oNSIsdPil_bFjyuqQJSvyBW9qZ_CG3L_zvv457kFCO3vqLw	include		exclude	yes
Hrnjica, Bahrudin, Softic, Selver	Explainable AI in Manufacturing: A Predictive Maintenance Case Study	10.1007/978-3-030-57997-5_8	https://link.springer.com/chapter/10.1007/978-3-030-57997-5_8	include		exclude	yes
Pickering, Lynn; Almajano, Tereso del Río; England, Matthew; Cohen, Kelly	Explainable AI Insights for Symbolic Computation: A case study on selecting the variable ordering for cylindrical algebraic decomposition	https://doi.org/10.1016/j.jsc.2023.102276	https://www.sciencedirect.com/science/article/pii/S0747717123000901	exclude			yes
Bhakte, Abhijit; Kumawat, Piyush Kumar; Srinivasan, Rajagopalan	Explainable AI methodology for understanding fault detection results during Multi-Mode operations	https://doi.org/10.1016/j.ces.2024.120493	https://www.sciencedirect.com/science/article/pii/S0009250924007930	include		exclude	yes
Hacker, Philipp, Krestel, Ralf, Grundmann, Stefan, Naumann, Felix	Explainable AI under contract and tort law: legal incentives and technical challenges	10.1007/s10506-020-09260-6	https://link.springer.com/article/10.1007/s10506-020-09260-6	exclude			yes
Martínez-Cid, Sergio; Vallejo, David; Herrera, Vanesa; Schez-Sobrino, Santiago; Castro-Schez, José J.; Albusac, Javier A.	Explainable AI-driven decision support system for personalizing rehabilitation routines in stroke recovery	10.1007/s13748-024-00357-6	https://link.springer.com/10.1007/s13748-024-00357-6	include		exclude	yes
Luo, Chen; Li, Ao-Jin; Xiao, Jiang; Li, Ming; Li, Yun	Explainable and generalizable AI-driven multiscale informatics for dynamic system modelling.	10.1038/s41598-024-67259-4	https://www.nature.com/articles/s41598-024-67259-4	exclude			yes
Kurniawan, William Manuel; Gambetta, Ir. Windy; Alfianny, Ir. Rika	Explainable Artificial Intelligence (XAI) Application on Classification of Diseases and Symptoms of Pest Infestation on Plants (Case Study on Rice Plant Leaves)	10.1109/ICoDSE63307.2024.10829875	https://ieeexplore.ieee.org/abstract/document/10829875	include		exclude	yes
Ali, Sajid; Abuhmed, Tamer; El-Sappagh, Shaker; Muhammad, Khan; Alonso-Moral, Jose M.; Confalonieri, Roberto; Guidotti, Riccardo; Ser, Javier Del; Díaz-Rodríguez, Natalia; Herrera, Francisco	Explainable Artificial Intelligence (XAI): What we know and what is left to attain Trustworthy Artificial Intelligence	https://doi.org/10.1016/j.inffus.2023.101805	https://www.sciencedirect.com/science/article/pii/S1566253523001148	exclude	XAI review		yes
Lünich, Marco; Keller, Birte	Explainable Artificial Intelligence for Academic Performance Prediction. An Experimental Study on the Impact of Accuracy and Simplicity of Decision Trees on Causability and Fairness Perceptions	10.1145/3630106.3658953	https://doi.org/10.1145/3630106.3658953	include		exclude	yes
Lamy, Jean-Baptiste; Sekar, Boomadevi; Guezennec, Gilles; Bouaud, Jacques; Séroussi, Brigitte	Explainable artificial intelligence for breast cancer: A visual case-based reasoning approach	https://doi.org/10.1016/j.artmed.2019.01.001	https://www.sciencedirect.com/science/article/pii/S0933365718304846	include		exclude	yes
Tsoka, Thamsanqa; Ye, Xianming; Chen, YangQuan; Gong, Dunwei; Xia, Xiaohua	Explainable artificial intelligence for building energy performance certificate labelling classification	https://doi.org/10.1016/j.jclepro.2022.131626	https://www.sciencedirect.com/science/article/pii/S0959652622012422	exclude			yes
Leung, Carson K.; Pazdor, Adam G.M.; Souza, Joglas	Explainable Artificial Intelligence for Data Science on Customer Churn	10.1109/DSAA53316.2021.9564166	https://ieeexplore.ieee.org/abstract/document/9564166?casa_token=1b9b3JL-2EwAAAAA:4Xhl8g60eVMWyaHM4ItqLT57mLXZcSNZoOCyl86suy3pXGfkbsrELGIXqokgfp_g_FN3_hZl_w	include		exclude	yes
Novielli, Pierfrancesco; Romano, Donato; Pavan, Stefano; Losciale, Pasquale; Stellacci, Anna Maria; Diacono, Domenico; Bellotti, Roberto; Tangaro, Sabina	Explainable artificial intelligence for genotype-to-phenotype prediction in plant breeding: a case study with a dataset from an almond germplasm collection.	10.3389/fpls.2024.1434229	https://www.frontiersin.org/journals/plant-science/articles/10.3389/fpls.2024.1434229/full	exclude			yes
Bi, Congbo; Luo, Yonghong; Lu, Chao	Explainable Artificial Intelligence for Power System Security Assessment: A Case Study on Short-Term Voltage Stability	10.1109/PowerTech55446.2023.10202889	https://ieeexplore.ieee.org/abstract/document/10202889	exclude			yes
III, Francis J. Prael; Blank, Jutta; Forrester, William C.; Shen, Lingling; Rodríguez-Pérez, Raquel	Explainable artificial intelligence for targeted protein degradation predictions	https://doi.org/10.1016/j.ailsci.2024.100121	https://www.sciencedirect.com/science/article/pii/S266731852400028X	exclude			yes
Veldhuis, Marthe S.; Ariëns, Simone; Ypma, Rolf J. F.; Abeel, Thomas; Benschop, Corina C. G.	Explainable artificial intelligence in forensics: Realistic explanations for number of contributor predictions of DNA profiles	https://doi.org/10.1016/j.fsigen.2021.102632	https://www.sciencedirect.com/science/article/pii/S187249732100168X	include		exclude	yes
Al-Taie, Zainab; Liu, Danlu; Mitchem, Jonathan B.; Papageorgiou, Christos; Kaifi, Jussuf T.; Warren, Wesley C.; Shyu, Chi-Ren	Explainable artificial intelligence in high-throughput drug repositioning for subgroup stratifications with interventionable potential	https://doi.org/10.1016/j.jbi.2021.103792	https://www.sciencedirect.com/science/article/pii/S1532046421001210	exclude			yes
Dong, Zehua; Wang, Junxiao; Li, Yanxia; Deng, Yunchao; Zhou, Wei; Zeng, Xiaoquan; Gong, Dexin; Liu, Jun; Pan, Jie; Shang, Renduo; Xu, Youming; Xu, Ming; Zhang, Lihui; Zhang, Mengjiao; Tao, Xiao; Zhu, Yijie; Du, Hongliu; Lu, Zihua; Yao, Liwen; Wu, Lianlian; Yu, Honggang	Explainable artificial intelligence incorporated with domain knowledge diagnosing early gastric neoplasms under white light endoscopy.	10.1038/s41746-023-00813-y	https://www.nature.com/articles/s41746-023-00813-y	include		exclude	yes
Letrache, Khadija; Ramdani, Mohammed	Explainable Artificial Intelligence: A Review and Case Study on Model-Agnostic Methods	10.1109/SITA60746.2023.10373722	https://ieeexplore.ieee.org/abstract/document/10373722	include		exclude	yes
Lv, Xiaoxing, Zhang, Xinjie, Zhuang, Ye, Guo, Konghui, Tan, Jiabao, Li, Hao	Explainable Brain-Like Decision-Making for Autonomous Vehicles Trustworthiness Improvement	10.1007/978-3-031-66968-2_15	https://link.springer.com/chapter/10.1007/978-3-031-66968-2_15	exclude			yes
Santi, Lisa Anita, Bargagna, Filippo, Santarelli, Maria Filomena, Vergaro, Giuseppe, Genovesi, Dario, Emdin, Michele, Giorgetti, Assuero, Positano, Vincenzo	Explainable CNN-Based Cardiac Amyloidosis Classification from PET Images Through Manifold Learning	10.1007/978-3-031-49062-0_53	https://link.springer.com/chapter/10.1007/978-3-031-49062-0_53	exclude			yes
Li, Xun, Chen, Dongsheng, Xu, Weipan, Chen, Haohui, Li, Junjun, Mo, Fan	Explainable dimensionality reduction (XDR) to unbox AI ‘black box’ models: A study of AI perspectives on the ethnic styles of village dwellings	10.1057/s41599-023-01505-4	https://www.nature.com/articles/s41599-023-01505-4	exclude			yes
Huang, Weitong; Suominen, Hanna; Liu, Tommy; Rice, Gregory; Salomon, Carlos; Barnard, Amanda S.	Explainable discovery of disease biomarkers: The case of ovarian cancer to illustrate the best practice in machine learning and Shapley analysis.	10.1016/j.jbi.2023.104365	https://www.sciencedirect.com/science/article/pii/S1532046423000862	exclude			yes
Eisenstadt, Viktor, Espinoza-Stapelfeld, Christian, Mikyas, Ada, Althoff, Klaus-Dieter	Explainable Distributed Case-Based Support Systems: Patterns for Enhancement and Validation of Design Recommendations	10.1007/978-3-030-01081-2_6	https://link.springer.com/chapter/10.1007/978-3-030-01081-2_6	include		exclude	yes
Mahamoodally, Naailah; Dridi, Jawher; Amayri, Manar	Explainable domain adaptation for imbalanced occupancy estimation	https://doi.org/10.1016/j.jobe.2024.110613	https://www.sciencedirect.com/science/article/pii/S2352710224021818	exclude			yes
Castiglione, Filippo; Nardini, Christine; Onofri, Elia; Pedicini, Marco; Tieri, Paolo	Explainable Drug Repurposing Approach From Biased Random Walks	10.1109/TCBB.2022.3191392	https://ieeexplore.ieee.org/abstract/document/9831014	exclude			yes
Belardinelli, Anna, Wang, Chao, Gienger, Michael	Explainable Human-Robot Interaction for Imitation Learning in Augmented Reality	10.1007/978-3-031-55000-3_7	https://link.springer.com/chapter/10.1007/978-3-031-55000-3_7	include		exclude	yes
Wenninger, Simon; Kaymakci, Can; Wiethe, Christian	Explainable long-term building energy consumption prediction using QLattice	https://doi.org/10.1016/j.apenergy.2021.118300	https://www.sciencedirect.com/science/article/pii/S0306261921015592	exclude			yes
Gharagoz, Masoum M.; Noureldin, Mohamed; Kim, Jinkoo	Explainable machine learning (XML) framework for seismic assessment of structures using Extreme Gradient Boosting (XGBoost)	https://doi.org/10.1016/j.engstruct.2025.119621	https://www.sciencedirect.com/science/article/pii/S0141029625000112	exclude			yes
Ryan, Darragh; Harris, Elaine; O’Connor, Gerard M.	Explainable machine learning for the regulatory environment: A case study in micro-droplet printing	https://doi.org/10.1016/j.addma.2024.104237	https://www.sciencedirect.com/science/article/pii/S2214860424002835	exclude			yes
Joshi, Gargi; Srivastava, Ananya; Yagnik, Bhargav; Hasan, Mohammed; Saiyed, Zainuddin; Gabralla, Lubna A.; Abraham, Ajith; Walambe, Rahee; Kotecha, Ketan	Explainable Misinformation Detection Across Multiple Social Media Platforms	10.1109/ACCESS.2023.3251892	https://ieeexplore.ieee.org/abstract/document/10064251	exclude			yes
Kostovska, Ana; Doerr, Carola; Džeroski, Sašo; Kocev, Dragi; Panov, Panče; Eftimov, Tome	Explainable Model-specific Algorithm Selection for Multi-Label Classification	10.1109/SSCI51031.2022.10022177	https://ieeexplore.ieee.org/abstract/document/10022177	exclude			yes
Komárek, Tomáš, Brabec, Jan, Somol, Petr	Explainable Multiple Instance Learning with Instance Selection Randomized Trees	10.1007/978-3-030-86520-7_44	https://link.springer.com/chapter/10.1007/978-3-030-86520-7_44	include		exclude	yes
Upadhyay, Rishabh; Knoth, Petr; Pasi, Gabriella; Viviani, Marco	Explainable online health information truthfulness in Consumer Health Search.	10.3389/frai.2023.1184851	https://www.frontiersin.org/journals/artificial-intelligence/articles/10.3389/frai.2023.1184851/full	include		exclude	yes
Rizzi, Williams, Comuzzi, Marco, Di Francescomarino, Chiara, Ghidini, Chiara, Lee, Suhwan, Maggi, Fabrizio Maria, Nolte, Alexander	Explainable predictive process monitoring: a user evaluation	10.1007/s44311-024-00003-3	https://link.springer.com/article/10.1007/s44311-024-00003-3	include		exclude	yes
Kuk, Edyta; Bobek, Szymon; Nalepa, Grzegorz J.	Explainable proactive control of industrial processes	https://doi.org/10.1016/j.jocs.2024.102329	https://www.sciencedirect.com/science/article/pii/S1877750324001224	exclude			yes
Lee, Eunji; Kim, Sihyeon; Kim, Sundong; Jung, Soyeon; Kim, Heeja; Cha, Meeyoung	Explainable Product Classification for Customs	10.1145/3635158	https://doi.org/10.1145/3635158	include		exclude	yes
Sironi, Chiara F.; Wilbik, Anna; Winands, Mark H. M.	Explainable Search: An Exploratory Study in SameGame	10.1109/CoG57401.2023.10333232	https://ieeexplore.ieee.org/abstract/document/10333232?casa_token=dLDOO2SenDkAAAAA:N73xU5Ub-0DjFRX-Lb6mIREQgSOfPMCYYyuZ4q78WpPaaQGleALBPnk0wQEdrBHCOhH1_TUf3VI	include		exclude	yes
Chhatwal, Rishi; Gronvall, Peter; Huber-Fliflet, Nathaniel; Keeling, Robert; Zhang, Jianping; Zhao, Haozhen	Explainable Text Classification in Legal Document Review A Case Study of Explainable Predictive Coding	10.1109/BigData.2018.8622073	https://ieeexplore.ieee.org/abstract/document/8622073?casa_token=YktkEyXPdusAAAAA:EZoRBymmkYbPeYmL-Xy-PqdGbfyIVdpvlqqAGYGmZXPl4nQv_yuM9Od7WQcRLf8REpG7l99wZQ	exclude			yes
Kobayashi, Kazuma; Alam, Syed Bahauddin	Explainable, interpretable, and trustworthy AI for an intelligent digital twin: A case study on remaining useful life	https://doi.org/10.1016/j.engappai.2023.107620	https://www.sciencedirect.com/science/article/pii/S0952197623018043	exclude			yes
Lezama, Fernando; Almeida, Jose; Soares, Joao; Vale, Zita	Explainergy: Towards Explainability of Metaheuristic Performance in the Energy Field	10.1109/SSCI52147.2023.10371844	https://ieeexplore.ieee.org/abstract/document/10371844?casa_token=CRaYYdUEglcAAAAA:friWfexlqIyFBs_YNDigPX8UOfYTEe_PoWMBFJajjQuxhfPXCl_nSmNAQz02c_SQ2KrvLEQZ2w	exclude			yes
Kermiche, Asma; Rouzzi, Chaima; Bellatreche, Ladjel	ExplainerX: An Integrated and Explainable AI Framework for Nearly Zero-Energy Buildings	10.1109/BigData59044.2023.10386148	https://ieeexplore.ieee.org/abstract/document/10386148?casa_token=iFdn9rRwXA0AAAAA:p3VCUnWnxqr7qQV0bWVzLEr5cNDAOo3iRH1-klf42b3Cvji9C9r4hT15Nsvsvq5yJ4A5nBLfIw	exclude			yes
Nguyen, Tri Minh; Quinn, Thomas P; Nguyen, Thin; Tran, Truyen	Explaining Black Box Drug Target Prediction Through Model Agnostic Counterfactual Samples	10.1109/TCBB.2022.3190266	https://doi.org/10.1109/TCBB.2022.3190266	include		exclude	yes
Marín-Veites, Paola, Bach, Kerstin	Explaining CBR Systems Through Retrieval and Similarity Measure Visualizations: A Case Study	10.1007/978-3-031-14923-8_8	https://link.springer.com/chapter/10.1007/978-3-031-14923-8_8	exclude			yes
Ford, Courtney, Keane, Mark T.	Explaining Classifications to Non-experts: An XAI User Study of Post-Hoc Explanations for a Classifier When People Lack Expertise	10.1007/978-3-031-37731-0_15	https://link.springer.com/chapter/10.1007/978-3-031-37731-0_15	include		exclude	yes
Schneider, Johannes, Vlachos, Michalis	Explaining classifiers by constructing familiar concepts	10.1007/s10994-022-06157-0	https://link.springer.com/article/10.1007/s10994-022-06157-0	include		exclude	yes
Spinnato, Francesco, Guidotti, Riccardo, Nanni, Mirco, Maccagnola, Daniele, Paciello, Giulia, Farina, Antonio Bencini	Explaining Crash Predictions on Multivariate Time Series Data	10.1007/978-3-031-18840-4_39	https://link.springer.com/chapter/10.1007/978-3-031-18840-4_39	exclude			yes
Zou, Mengbang; Perrusquía, Adolfo; Guo, Weisi	Explaining Data-Driven Control in Autonomous Systems: A Reinforcement Learning Case Study	10.1109/CoDIT62066.2024.10708274	https://ieeexplore.ieee.org/abstract/document/10708274?casa_token=OoiJl8bo13IAAAAA:Oc2yTyyKOt5MIYTBArD_orMINzny98yuuuev-hnX_kN7AJ12aCb8DCCacBxiJz5DZ-m3lzWxuw	exclude			yes
Herm, Lukas-Valentin; Heinrich, Kai; Wanner, Jonas; Janiesch, Christian	Stop ordering machine learning algorithms by their explainability! A user-centered investigation of performance and explainability	https://doi.org/10.1016/j.ijinfomgt.2022.102538	https://www.sciencedirect.com/science/article/pii/S026840122200072X	include		include		yes	healthcare	image data	What-Else	Why-Not	lay users	98																																			***-
Hernandez-Bocanegra, Diana C.; Ziegler, Jürgen	Explaining Recommendations through Conversations: Dialog Model and the Effects of Interface Type and Degree of Interactivity	10.1145/3579541	https://doi.org/10.1145/3579541	include		include	yes	yes	recommender systems (hotels)	tabular	"feature importance" (modelspecific)	"feature importance" + NLP Agent	lay users	223
John, Thrupthi Ann; Balasubramanian, Vineeth N.; Jawahar, C. V.	Explaining Deep Face Algorithms Through Visualization: A Survey	10.1109/TBIOM.2023.3319837	https://ieeexplore.ieee.org/abstract/document/10265112?casa_token=f0HRqdzFvqoAAAAA:RiJvUxtP4Viqh_Qrm_GOBnZUnLFZwWJye5-OBP6nBlkm6FAIygeAfkOCkGP5GbwK7JPngFHMTA	include		exclude	yes		image detection	image data	inversion	saliency	lay users	ca 85
John, Thrupthi Ann; Balasubramanian, Vineeth N.; Jawahar, C. V.	Explaining Deep Face Algorithms Through Visualization: A Survey	10.1109/TBIOM.2023.3319837	https://ieeexplore.ieee.org/abstract/document/10265112?casa_token=f0HRqdzFvqoAAAAA:RiJvUxtP4Viqh_Qrm_GOBnZUnLFZwWJye5-OBP6nBlkm6FAIygeAfkOCkGP5GbwK7JPngFHMTA	include		exclude			image detection	image data	visualization	saliency	lay users	ca 85
John, Thrupthi Ann; Balasubramanian, Vineeth N.; Jawahar, C. V.	Explaining Deep Face Algorithms Through Visualization: A Survey	10.1109/TBIOM.2023.3319837	https://ieeexplore.ieee.org/abstract/document/10265112?casa_token=f0HRqdzFvqoAAAAA:RiJvUxtP4Viqh_Qrm_GOBnZUnLFZwWJye5-OBP6nBlkm6FAIygeAfkOCkGP5GbwK7JPngFHMTA	include		exclude			image detection	image data	visualization	inversion	lay users	ca 85
John, Thrupthi Ann; Balasubramanian, Vineeth N.; Jawahar, C. V.	Explaining Deep Face Algorithms Through Visualization: A Survey	10.1109/TBIOM.2023.3319837	https://ieeexplore.ieee.org/abstract/document/10265112?casa_token=f0HRqdzFvqoAAAAA:RiJvUxtP4Viqh_Qrm_GOBnZUnLFZwWJye5-OBP6nBlkm6FAIygeAfkOCkGP5GbwK7JPngFHMTA	include		exclude			image detection	image data	inversion	saliency	AI experts	ca 16
John, Thrupthi Ann; Balasubramanian, Vineeth N.; Jawahar, C. V.	Explaining Deep Face Algorithms Through Visualization: A Survey	10.1109/TBIOM.2023.3319837	https://ieeexplore.ieee.org/abstract/document/10265112?casa_token=f0HRqdzFvqoAAAAA:RiJvUxtP4Viqh_Qrm_GOBnZUnLFZwWJye5-OBP6nBlkm6FAIygeAfkOCkGP5GbwK7JPngFHMTA	include		exclude			image detection	image data	visualization	saliency	AI experts	ca 16
John, Thrupthi Ann; Balasubramanian, Vineeth N.; Jawahar, C. V.	Explaining Deep Face Algorithms Through Visualization: A Survey	10.1109/TBIOM.2023.3319837	https://ieeexplore.ieee.org/abstract/document/10265112?casa_token=f0HRqdzFvqoAAAAA:RiJvUxtP4Viqh_Qrm_GOBnZUnLFZwWJye5-OBP6nBlkm6FAIygeAfkOCkGP5GbwK7JPngFHMTA	include		exclude			image detection	image data	visualization	inversion	AI experts	ca 16
Saadat, Samaneh; Sukthankar, Gita	Explaining Differences in Classes of Discrete Sequences	10.1109/WIIAT50758.2020.00022	https://ieeexplore.ieee.org/abstract/document/9457746?casa_token=OIcde6s56QEAAAAA:jWlk7_36v0NA8y8FTD_uss66Blk68l8rpRMR28hh6bFWiweeBJ-pcJx1gWcyrl_hiySVACrtXQ	exclude			yes
Adair, Jason; Thomson, Sarah L; Brownlee, Alexander E. I.	Explaining evolutionary feature selection via local optima networks	10.1145/3638530.3664183	https://doi.org/10.1145/3638530.3664183	include		exclude	yes
Lerman, Samuel; Venuto, Charles; Kautz, Henry; Xu, Chenliang	Explaining Local, Global, And Higher-Order Interactions In Deep Learning	10.1109/ICCV48922.2021.00126	https://openaccess.thecvf.com/content/ICCV2021/html/Lerman_Explaining_Local_Global_and_Higher-Order_Interactions_in_Deep_Learning_ICCV_2021_paper.html	include		exclude	yes
Warren, Greta, Delaney, Eoin, Guéret, Christophe, Keane, Mark T.	Explaining Multiple Instances Counterfactually:User Tests of Group-Counterfactuals for XAI	10.1007/978-3-031-63646-2_14	https://link.springer.com/chapter/10.1007/978-3-031-63646-2_14	include		exclude	yes
Canário, João Paulo; Ribeiro, Otávio; Rios, Ricardo	Explaining noise effects in CNN: a practical case study on volcano signals	10.1109/SIBGRAPI55357.2022.9991782	https://ieeexplore.ieee.org/abstract/document/9991782?casa_token=UEz2BFpqnEQAAAAA:ih2OUSq3i7zDUeCLRTl2B39eGtBGu6G8xO0W79dCVgQl0U9pk8-Y1GUzRgbi-v7KDaJUY_o5QA	exclude			yes
Andersen, Jakob Smedegaard; Zukunft, Olaf	Explaining Prediction Uncertainty in Text Classification: The DUX Approach	10.1145/3639233.3639352	https://doi.org/10.1145/3639233.3639352	include		exclude	yes
Donadello, Ivan; Dragoni, Mauro; Eccher, Claudio	Explaining reasoning algorithms with persuasiveness: a case study for a behavioural change system	10.1145/3341105.3373910	https://doi.org/10.1145/3341105.3373910	include		exclude	yes
Donkers, Tim; Kleemann, Timm; Ziegler, Jürgen	Explaining recommendations by means of aspect-based transparent memories	10.1145/3377325.3377520	https://doi.org/10.1145/3377325.3377520	include		exclude	yes
Hernandez-Bocanegra, Diana C.; Ziegler, Jürgen	Explaining Recommendations through Conversations: Dialog Model and the Effects of Interface Type and Degree of Interactivity	10.1145/3579541	https://doi.org/10.1145/3579541	include		include		yes	recommender systems (hotels)	tabular	low interactivity	high interactivity	lay users	223
Jahn, Tobias; Hühn, Philipp; Förster, Maximilian	Wasn’t Expecting that – Using Abnormality as a Key to Design a Novel User-Centric Explainable AI Method	10.1007/978-3-031-61175-9_5	https://link.springer.com/10.1007/978-3-031-61175-9_5	include		include	yes	yes	house price prediction	tabular data	CARE (counterfactual)	ACE (counterfactual	lay users	40										**+
Phyo Wai KHAING, Minghong GENG, Shubham PATERIA, Budhitama SUBAGDJa, Ah-hwee TAN	Explaining sequences of actions in multi-agent deep reinforcement learning models	10.1609/aaai.v34i10.7255	http://ink.library.smu.edu.sg/sis_research/9783	include		exclude	yes
Mukhtar, Adil; Hofer, Birgit; Jannach, Dietmar; Wotawa, Franz	Explaining software fault predictions to spreadsheet users	https://doi.org/10.1016/j.jss.2023.111676	https://www.sciencedirect.com/science/article/pii/S0164121223000717	include		exclude	yes		excel faulty cell detection	tabular data	no explanation	LIME (visual)	domain experts	120
Mukhtar, Adil; Hofer, Birgit; Jannach, Dietmar; Wotawa, Franz	Explaining software fault predictions to spreadsheet users	https://doi.org/10.1016/j.jss.2023.111676	https://www.sciencedirect.com/science/article/pii/S0164121223000717	include		exclude			excel faulty cell detection	tabular data	LIME (visual)	LIME + NLP	domain experts	120
Mukhtar, Adil; Hofer, Birgit; Jannach, Dietmar; Wotawa, Franz	Explaining software fault predictions to spreadsheet users	https://doi.org/10.1016/j.jss.2023.111676	https://www.sciencedirect.com/science/article/pii/S0164121223000717	include		exclude			excel faulty cell detection	tabular data	human explanation (manual)	LIME + NLP	domain experts	120
Kampik, Timotheus, Nieves, Juan Carlos, Lindgren, Helena	Explaining Sympathetic Actions of Rational Agents	10.1007/978-3-030-30391-4_4	https://link.springer.com/chapter/10.1007/978-3-030-30391-4_4	include		exclude	yes
Mahmud, Saaduddin; Vazquez-Chanlatte, Marcell; Witwicki, Stefan; Zilberstein, Shlomo	Explaining the Behavior of POMDP-based Agents Through the Impact of Counterfactual Information	10.5555/3635637.3662993	https://dl.acm.org/doi/abs/10.5555/3635637.3662993	include		exclude	yes
Castellini, Alberto, Marchesini, Enrico, Mazzi, Giulio, Farinelli, Alessandro	Explaining the Influence of Prior Knowledge on POMCP Policies	10.1007/978-3-030-66412-1_17	https://link.springer.com/chapter/10.1007/978-3-030-66412-1_17	exclude			yes
Jmoona, Waleed, Ahmed, Mobyen Uddin, Islam, Mir Riyanul, Barua, Shaibal, Begum, Shahina, Ferreira, Ana, Cavagnetto, Nicola	Explaining the Unexplainable: Role of XAI for Flight Take-Off Time Delay Prediction	10.1007/978-3-031-34107-6_7	https://link.springer.com/chapter/10.1007/978-3-031-34107-6_7	include		exclude	yes
Jalali, Anahid, Haslhofer, Bernhard, Kriglstein, Simone, Rauber, Andreas	Predictability and Comprehensibility in Post-Hoc XAI Methods: A User-Centered Analysis	10.1007/978-3-031-37717-4_46	https://link.springer.com/chapter/10.1007/978-3-031-37717-4_46	include		include	yes	yes	house price prediction	tabular data	SHAP	LIME	AI experts	47												*+
Koptelov, Maksim, Zimmermann, Albrecht, Boizumault, Patrice, Bureau, Ronan, Lamotte, Jean-Luc	Explanations for Itemset Mining by Constraint Programming: A Case Study Using ChEMBL Data	10.1007/978-3-031-30047-9_17	https://link.springer.com/chapter/10.1007/978-3-031-30047-9_17	exclude			yes
Teso, Stefano; Kersting, Kristian	Explanatory Interactive Machine Learning	10.1145/3306618.3314293	https://doi.org/10.1145/3306618.3314293	include		exclude	yes
Ai, Lun, Langer, Johannes, Muggleton, Stephen H., Schmid, Ute	Explanatory machine learning for sequential human teaching	10.1007/s10994-023-06351-8	https://link.springer.com/article/10.1007/s10994-023-06351-8	include		exclude	yes
Nyrup, Rune; Robinson, Diana	Explanatory pragmatism: a context-sensitive framework for explainable medical AI.	10.1007/s10676-022-09632-3	https://link.springer.com/article/10.1007/s10676-022-09632-3	exclude	no user study		yes
Rebane, Jonathan; Samsten, Isak; Papapetrou, Panagiotis	Exploiting complex medical data with interpretable deep learning for adverse drug event prediction.	10.1016/j.artmed.2020.101942	https://www.sciencedirect.com/science/article/abs/pii/S0933365719311546	exclude			yes
Solano-Kamaiko, Ian René; Mishra, Dibyendu; Dell, Nicola; Vashistha, Aditya	Explorable Explainable AI: Improving AI Understanding for Community Health Workers in India	10.1145/3613904.3642733	https://doi.org/10.1145/3613904.3642733	include		exclude	yes
Kobylińska, Katarzyna; Krzyziński, Mateusz; Machowicz, Rafał; Adamek, Mariusz; Biecek, Przemysław	Exploration of the Rashomon Set Assists Trustworthy Explanations for Medical Data	10.1109/JBHI.2024.3443069	https://ieeexplore.ieee.org/abstract/document/10745964?casa_token=zLFI9MuAvyIAAAAA:yHP1QeIPJiqaj-Id3XmTW3_zWhzPr8lmDyRDCwUvIZ2QAUaDmJ-flxwZ0hDvDhtQ7Ak0-1MHbA	include		exclude	yes
Min Hun LEE, Yi Jing CHOY	Exploring a gradient-based explainable AI technique for time-series data: A case study of assessing stroke rehabilitation exercises	10.2139/ssrn.4757296	http://ink.library.smu.edu.sg/sis_research/8580	exclude			yes
Min Hun LEE, Yi Jing CHOY	Exploring a gradient-based explainable AI technique for time-series data: A case study of assessing stroke rehabilitation exercises	10.2139/ssrn.4757296	http://ink.library.smu.edu.sg/sis_research/8580	exclude
Heng Yim Nicole OO, Min Hun LEE, J. H. LIM	Exploring a multimodal fusion-based deep learning network for detecting facial palsy	10.1016/b978-0-44-313233-9.00017-5	http://ink.library.smu.edu.sg/sis_research/9958	exclude			yes
Jansen, Anniek; Leborgne, François; Wang, Qiurui; Zhang, Chao	Contextualizing the “Why”: The Potential of Using Visual Map As a Novel XAI Method for Users with Low AI-literacy	10.1145/3613905.3650812	https://doi.org/10.1145/3613905.3650812	include		include		yes	Titanic use case	Tabuar data	Counterfactual	Visual Map	lay users	60
Jansen, Anniek; Leborgne, François; Wang, Qiurui; Zhang, Chao	Contextualizing the “Why”: The Potential of Using Visual Map As a Novel XAI Method for Users with Low AI-literacy	10.1145/3613905.3650812	https://doi.org/10.1145/3613905.3650812	include		include		yes	Titanic use case	Tabuar data	decision tree	Visual Map	lay users	60																																	*+	***+
Teixeira, Brígida; Valina, Luís; Pinto, Tiago; Reis, Arsénio; Barroso, João; Vale, Zita	Exploring Clustering to Improve Interpretability in Complex Energy Forecasting Models	10.1109/SEST61601.2024.10694413	https://ieeexplore.ieee.org/abstract/document/10694413?casa_token=sW769Unt3McAAAAA:7W1zzHqQs5eRuy5gEavSG0I7rTEyNBvegt9OjNYgZla7RGhSMWqNYD4roMO_fNPWixxMnAnLXHQ	exclude			yes
AZZEM, Yousra Chahinez HADJ; Harrag, Fouzi; Bellatreche, Ladjel	Exploring Explainability in Arabic Language Models: An Empirical Analysis of Techniques	https://doi.org/10.1016/j.procs.2024.10.194	https://www.sciencedirect.com/science/article/pii/S1877050924029958	exclude	no user study		yes
Górski, Łukasz, Kuźniacki, Błażej, Almada, Marco, Tyliński, Kamil, Calvo, Madalena, Asnaghi, Pablo Matias, Almada, Luciano, Iñiguez, Hilario, Rubianes, Fernando, Pera, Octavio, Nigrelli, Juan Ignacio	Exploring explainable AI in the tax domain	10.1007/s10506-024-09395-w	https://link.springer.com/article/10.1007/s10506-024-09395-w	exclude			yes
Wang, Shuo; Zhang, Tianzhuo; Li, Ziheng; Hong, Jinglan	Exploring pollutant joint effects in disease through interpretable machine learning.	10.1016/j.jhazmat.2024.133707	https://www.sciencedirect.com/science/article/abs/pii/S0304389424002863	exclude			yes
Colley, Ashley; Kalving, Matilda; Häkkilä, Jonna; Väänänen, Kaisa	Exploring Tangible Explainable AI (TangXAI): A User Study of Two XAI Approaches	10.1145/3638380.3638426	https://doi.org/10.1145/3638380.3638426	include		exclude	yes
Abdelaal, Yasmin; Aupetit, Michaël; Baggag, Abdelkader; Al-Thani, Dena	Exploring the Applications of Explainability in Wearable Data Analytics: Systematic Literature Review	https://doi.org/10.2196/53863	https://www.sciencedirect.com/science/article/pii/S143888712400997X	exclude			yes
Triana Rejekiningsih, Hanan al Hakimi	Exploring the integration of ideological values with artificial intelligence technology: A legal awareness perspective	10.21831/jc.v20i2.64132	http://scholarhub.uny.ac.id/civics/vol20/iss2/4	include		exclude	yes
Haddad, Maroun; Bouguessa, Mohamed	Exploring the representational power of graph autoencoder	https://doi.org/10.1016/j.neucom.2021.06.034	https://www.sciencedirect.com/science/article/pii/S0925231221009383	exclude			yes
Jansen, Anniek; Leborgne, François; Wang, Qiurui; Zhang, Chao	Contextualizing the “Why”: The Potential of Using Visual Map As a Novel XAI Method for Users with Low AI-literacy	10.1145/3613905.3650812	https://doi.org/10.1145/3613905.3650812	include		include		yes	Titanic use case	Tabuar data	decision tree	Visual Map	AI experts	60
Dwivedi, Mridula, Pandey, Babita, Saxena, Vipin	Exploring the scope of explainable artificial intelligence in link prediction problem-an experimental study	10.1007/s11042-024-18287-9	https://link.springer.com/article/10.1007/s11042-024-18287-9	exclude			yes
Joshi, Rutuja, Graefe, Julia, Kraus, Michael, Bengler, Klaus	Exploring the Impact of Explainability on Trust and Acceptance of Conversational Agents – A Wizard of Oz Study	10.1007/978-3-031-60606-9_12	https://link.springer.com/chapter/10.1007/978-3-031-60606-9_12	include		exclude	yes
Milcke, Björn, Dinglinger, Pascal, Holtmann, Jonas	Exploring the Role of Explainable AI in the Development and Qualification of Aircraft Quality Assurance Processes: A Case Study	10.1007/978-3-031-63803-9_18	https://link.springer.com/chapter/10.1007/978-3-031-63803-9_18	exclude			yes
Wang, Qianwen; Huang, Kexin; Chandak, Payal; Zitnik, Marinka; Gehlenborg, Nils	Extending the Nested Model for User-Centric XAI: A Design Study on GNN-based Drug Repurposing.	10.1109/TVCG.2022.3209435	https://ieeexplore.ieee.org/abstract/document/9916585	include		exclude	yes
Soemers, Dennis J. N. J.; Samothrakis, Spyridon; Piette, Éric; Stephenson, Matthew	Extracting tactics learned from self-play in general games	https://doi.org/10.1016/j.ins.2022.12.080	https://www.sciencedirect.com/science/article/pii/S0020025522015754	exclude			yes
Morrison, Katelyn; Jain, Mayank; Hammer, Jessica; Perer, Adam	Eye into AI: Evaluating the Interpretability of Explainable AI Techniques through a Game with a Purpose	10.1145/3610064	https://doi.org/10.1145/3610064	include		exclude	yes
VanNostrand, Peter M.; Zhang, Huayi; Hofmann, Dennis M.; Rundensteiner, Elke A.	FACET: Robust Counterfactual Explanation Analytics	10.1145/3626729	https://doi.org/10.1145/3626729	include		exclude	yes
Nguyen, Quoc-Toan; Le, Linh; Tran, Xuan-The; Do, Thomas; Lin, Chin-Teng	FairAD-XAI: Evaluation Framework for Explainable AI Methods in Alzheimer's Disease Detection with Fairness-in-the-loop	10.1145/3675094.3678998	https://doi.org/10.1145/3675094.3678998	include		exclude	yes
Akbar, Gilang; Dhini, Arian	Fault Detection Model of Rotating Machinery Using Machine Learning: Case Study of Oil and Gas Company	10.1109/SKIMA59232.2023.10387361	https://ieeexplore.ieee.org/abstract/document/10387361?casa_token=Nbir5I6_LekAAAAA:bVd3ALQ_T3XjUWbyTSfBJJUUrMbV55biRzFCZwSwRz5D0PDy-62ZblSDFqh0jEIJrv_sqMbPHQ	exclude			yes
Kumar, Ajay; Taylor, james W.	Feature importance in the age of explainable AI: Case study of detecting fake news & misinformation via a multi-modal framework	https://doi.org/10.1016/j.ejor.2023.10.003	https://www.sciencedirect.com/science/article/pii/S0377221723007609	exclude			yes
Curia, Francesco	Features and explainable methods for cytokines analysis of Dry Eye Disease in HIV infected patients	https://doi.org/10.1016/j.health.2021.100001	https://www.sciencedirect.com/science/article/pii/S2772442521000010	exclude			yes
Ducange, Pietro, Marcelloni, Francesco, Renda, Alessandro, Ruffini, Fabrizio	Federated Learning of XAI Models in Healthcare: A Case Study on Parkinson’s Disease	10.1007/s12559-024-10332-x	https://link.springer.com/article/10.1007/s12559-024-10332-x	exclude			yes
Khanna, Roli; Dodge, Jonathan; Anderson, Andrew; Dikkala, Rupika; Irvine, Jed; Shureih, Zeyad; Lam, Kin-Ho; Matthews, Caleb R.; Lin, Zhengxian; Kahng, Minsuk; Fern, Alan; Burnett, Margaret	Finding AI’s Faults with AAR/AI: An Empirical Study	10.1145/3487065	https://doi.org/10.1145/3487065	include		exclude	yes
Frej, Jibril; Shah, Neel; Knezevic, Marta; Nazaretsky, Tanya; Käser, Tanja	Finding Paths for Explainable MOOC Recommendation: A Learner Perspective	10.1145/3636555.3636898	https://doi.org/10.1145/3636555.3636898	include		exclude	yes
Cappuccio, Eleonora; Fadda, Daniele; Lanzilotti, Rosa; Rinzivillo, Salvatore	FIPER: A Visual-Based Explanation Combining Rules and Feature Importance	10.1007/978-3-031-74633-8_11	https://link.springer.com/10.1007/978-3-031-74633-8_11	include		exclude	yes
Jansen, Anniek; Leborgne, François; Wang, Qiurui; Zhang, Chao	Contextualizing the “Why”: The Potential of Using Visual Map As a Novel XAI Method for Users with Low AI-literacy	10.1145/3613905.3650812	https://doi.org/10.1145/3613905.3650812	include		include	yes	yes	Titanic use case	Tabuar data	SHAP	Visual Map	lay users	60																																		*+
Karran, Alexander John; Demazure, Théophile; Hudon, Antoine; Senecal, Sylvain; Léger, Pierre-Majorique	Designing for Confidence: The Impact of Visualizing Artificial Intelligence Decisions.	10.3389/fnins.2022.883385	https://www.frontiersin.org/journals/neuroscience/articles/10.3389/fnins.2022.883385/full	include		include		yes	image classification	image data	pointcloud (integrated Gradients)	heatmap (Grad CAM)	lay users	206					*-
Karran, Alexander John; Demazure, Théophile; Hudon, Antoine; Senecal, Sylvain; Léger, Pierre-Majorique	Designing for Confidence: The Impact of Visualizing Artificial Intelligence Decisions.	10.3389/fnins.2022.883385	https://www.frontiersin.org/journals/neuroscience/articles/10.3389/fnins.2022.883385/full	include		include		yes	image classification	image data	pointcloud (integrated Gradients)	outline (integrated gradients)	lay users	206					**-
Karran, Alexander John; Demazure, Théophile; Hudon, Antoine; Senecal, Sylvain; Léger, Pierre-Majorique	Designing for Confidence: The Impact of Visualizing Artificial Intelligence Decisions.	10.3389/fnins.2022.883385	https://www.frontiersin.org/journals/neuroscience/articles/10.3389/fnins.2022.883385/full	include		include	yes	yes	image classification	image data	without image	methods on image	lay users	206					***+
Koh, Seunghun; Kim, Byung Hyung; Jo, Sungho	Understanding the User Perception and Experience of Interactive Algorithmic Recourse Customization	10.1145/3674503	https://doi.org/10.1145/3674503	include		include	yes	yes	loan application	tabular data	DiCE	DiCE + interaction actionable features	lay users	30
Petsis, Spyridon, Karamanou, Areti, Kalampokis, Evangelos, Tarabanis, Konstantinos	Forecasting and explaining emergency department visits in a public hospital	10.1007/s10844-022-00716-6	https://link.springer.com/article/10.1007/s10844-022-00716-6	exclude			yes
Gama, João; Ribeiro, Rita P.; Mastelini, Saulo; Davari, Narjes; Veloso, Bruno	From fault detection to anomaly explanation: A case study on predictive maintenance	https://doi.org/10.1016/j.websem.2024.100821	https://www.sciencedirect.com/science/article/pii/S1570826824000076	include		exclude	yes
Koh, Seunghun; Kim, Byung Hyung; Jo, Sungho	Understanding the User Perception and Experience of Interactive Algorithmic Recourse Customization	10.1145/3674503	https://doi.org/10.1145/3674503	include		include		yes	loan application	tabular data	DiCE	DiCE + interaction actionable and priority features	lay users	30
Evirgen, Noyan; Wang, Ruolin; Chen, Xiang 'Anthony	From Text to Pixels: Enhancing User Understanding through Text-to-Image Model Explanations	10.1145/3640543.3645173	https://doi.org/10.1145/3640543.3645173	include		exclude	yes
Çifci, Ahmet, Kırbaş, İsmail	Fusion of machine learning and explainable AI for enhanced rice classification: a case study on Cammeo and Osmancik species	10.1007/s00217-024-04614-9	https://link.springer.com/article/10.1007/s00217-024-04614-9	exclude			yes
Arabikhan, Farzad; Gegov, Alexander; Kaymak, Uzay; Akbari, Negar	Fuzzy Networks for Explainable Artificial Intelligence	10.1109/CAI54212.2023.00094	https://ieeexplore.ieee.org/abstract/document/10195062?casa_token=LN6KCzjT8e8AAAAA:gwRACIgbRCmxFiApbDOPF2j8gU91t_dxITVUn4XHRxLdGl1jFfOMwncNOd9tXehQiiOCaf08IQ	exclude			yes
Koh, Seunghun; Kim, Byung Hyung; Jo, Sungho	Understanding the User Perception and Experience of Interactive Algorithmic Recourse Customization	10.1145/3674503	https://doi.org/10.1145/3674503	include		include		yes	loan application	tabular data	DiCE + interaction actionable features	DiCE + interaction actionable and priority features	lay users	30
Koh, Seunghun; Kim, Byung Hyung; Jo, Sungho	Understanding the User Perception and Experience of Interactive Algorithmic Recourse Customization	10.1145/3674503	https://doi.org/10.1145/3674503	include		include		yes	loan application	tabular data	DiCE + interaction priority features	DiCE + interaction actionable and priority features	lay users	30
Kouki, Pigi; Schaffer, James; PuJara, Jay; O’Donovan, John; Getoor, Lise	Generating and Understanding Personalized Explanations in Hybrid Recommender Systems	10.1145/3365843	https://doi.org/10.1145/3365843	include		exclude	yes
Wickramanayake, Bemali; Ouyang, Chun; Xu, Yue; Moreira, Catarina	Generating multi-level explanations for process outcome predictions	https://doi.org/10.1016/j.engappai.2023.106678	https://www.sciencedirect.com/science/article/pii/S095219762300862X	exclude			yes
Wickramanayake, Bemali, Ouyang, Chun, Moreira, Catarina, Xu, Yue	Generating Purpose-Driven Explanations: The Case of Process Predictive Model Inspection	10.1007/978-3-031-07481-3_14	https://link.springer.com/chapter/10.1007/978-3-031-07481-3_14	include		exclude	yes
Bui, Tien-Cuong; Le, Van-Duc; Li, Wen-Syan	Generating Real-Time Explanations for GNNs via Multiple Specialty Learners and Online Knowledge Distillation	10.1109/ACCESS.2023.3270385	https://ieeexplore.ieee.org/abstract/document/10107968	include		exclude	yes
Guyomard, Victor, Fessant, Françoise, Guyet, Thomas, Bouadi, Tassadit, Termier, Alexandre	Generating Robust Counterfactual Explanations	10.1007/978-3-031-43418-1_24	https://link.springer.com/chapter/10.1007/978-3-031-43418-1_24	include		exclude	yes
Fulton, Laura Beth; Lee, Ja Young; Wang, Qian; Yuan, Zhendong; Hammer, Jessica; Perer, Adam	Getting Playful with Explainable AI: Games with a Purpose to Improve Human Understanding of AI	10.1145/3334480.3382831	https://doi.org/10.1145/3334480.3382831	include		exclude	yes
Gao, Yuyang; Gu, Siyi; Jiang, Junji; Hong, Sungsoo Ray; Yu, Dazhou; Zhao, Liang	Going Beyond XAI: A Systematic Survey for Explanation-Guided Learning	10.1145/3644073	https://doi.org/10.1145/3644073	exclude			yes
Bhattacharya, Debarpan; Poorjam, Amir H.; Mittal, Deepak; Ganapathy, Sriram	Gradient-Free Post-Hoc Explainability Using Distillation Aided Learnable Approach	10.1109/JSTSP.2024.3467914	https://ieeexplore.ieee.org/abstract/document/10777496	exclude			yes
Dileo, Manuel, Olmeda, Raffaele, Pindaro, Margherita, Zignani, Matteo	Graph Machine Learning for Fast Product Development from Formulation Trials	10.1007/978-3-031-70378-2_19	https://link.springer.com/chapter/10.1007/978-3-031-70378-2_19	exclude			yes
Khodabandehloo, Elham; Riboni, Daniele; Alimohammadi, Abbas	HealthXAI: Collaborative and explainable AI for supporting early diagnosis of cognitive decline	https://doi.org/10.1016/j.future.2020.10.030	https://www.sciencedirect.com/science/article/pii/S0167739X20330144	include		exclude	yes
Okamoto, Lauren; Parmar, Paritosh	Hierarchical NeuroSymbolic Approach for Comprehensive and Explainable Action Quality Assessment	10.1109/CVPRW63382.2024.00326	https://openaccess.thecvf.com/content/CVPR2024W/CVsports/html/Okamoto_Hierarchical_NeuroSymbolic_Approach_for_Comprehensive_and_Explainable_Action_Quality_Assessment_CVPRW_2024_paper.html	exclude			yes
Kim, Sunnie S. Y., Meister, Nicole, Ramaswamy, Vikram V., Fong, Ruth, Russakovsky, Olga	HIVE: Evaluating the Human Interpretability of Visual Explanations	10.1007/978-3-031-19775-8_17	https://link.springer.com/chapter/10.1007/978-3-031-19775-8_17	include		exclude	yes
Jesus, Sérgio; Belém, Catarina; Balayan, Vladimir; Bento, João; Saleiro, Pedro; Bizarro, Pedro; Gama, João	How can I choose an explainer? An Application-grounded Evaluation of Post-hoc Explanations	10.1145/3442188.3445941	https://doi.org/10.1145/3442188.3445941	include		exclude	yes	yes	fraud detection	tabular	no explanation	confidence score	domain experts	3
Jesus, Sérgio; Belém, Catarina; Balayan, Vladimir; Bento, João; Saleiro, Pedro; Bizarro, Pedro; Gama, João	How can I choose an explainer? An Application-grounded Evaluation of Post-hoc Explanations	10.1145/3442188.3445941	https://doi.org/10.1145/3442188.3445941	include		exclude		yes	fraud detection	tabular	no explanation	confidence score + LIME	domain experts	3
Jesus, Sérgio; Belém, Catarina; Balayan, Vladimir; Bento, João; Saleiro, Pedro; Bizarro, Pedro; Gama, João	How can I choose an explainer? An Application-grounded Evaluation of Post-hoc Explanations	10.1145/3442188.3445941	https://doi.org/10.1145/3442188.3445941	include		exclude		yes	fraud detection	tabular	no explanation	confidence score + TreeInterpreter	domain experts	3
Jesus, Sérgio; Belém, Catarina; Balayan, Vladimir; Bento, João; Saleiro, Pedro; Bizarro, Pedro; Gama, João	How can I choose an explainer? An Application-grounded Evaluation of Post-hoc Explanations	10.1145/3442188.3445941	https://doi.org/10.1145/3442188.3445941	include		exclude		yes	fraud detection	tabular	no explanation	confidence score+SHAP	domain experts	3
Jesus, Sérgio; Belém, Catarina; Balayan, Vladimir; Bento, João; Saleiro, Pedro; Bizarro, Pedro; Gama, João	How can I choose an explainer? An Application-grounded Evaluation of Post-hoc Explanations	10.1145/3442188.3445941	https://doi.org/10.1145/3442188.3445941	include		exclude		yes	fraud detection	tabular	confidence score	confidence score + TreeInterpreter	domain experts	3
Jesus, Sérgio; Belém, Catarina; Balayan, Vladimir; Bento, João; Saleiro, Pedro; Bizarro, Pedro; Gama, João	How can I choose an explainer? An Application-grounded Evaluation of Post-hoc Explanations	10.1145/3442188.3445941	https://doi.org/10.1145/3442188.3445941	include		exclude		yes	fraud detection	tabular	confidence score + LIME	confidence score + TreeInterpreter	domain experts	3
Jesus, Sérgio; Belém, Catarina; Balayan, Vladimir; Bento, João; Saleiro, Pedro; Bizarro, Pedro; Gama, João	How can I choose an explainer? An Application-grounded Evaluation of Post-hoc Explanations	10.1145/3442188.3445941	https://doi.org/10.1145/3442188.3445941	include		exclude		yes	fraud detection	tabular	confidence score+SHAP	confidence score + TreeInterpreter	domain experts	3
Keane, Mark T., Kenny, Eoin M.	How Case-Based Reasoning Explains Neural Networks: A Theoretical Analysis of XAI Using Post-Hoc Explanation-by-Example from a Survey of ANN-CBR Twin-Systems	10.1007/978-3-030-29249-2_11	https://link.springer.com/chapter/10.1007/978-3-030-29249-2_11	exclude			yes
Gu, Ken; Shang, Ruoxi; Althoff, Tim; Wang, Chenglong; Drucker, Steven M.	How Do Analysts Understand and Verify AI-Assisted Data Analyses?	10.1145/3613904.3642497	https://doi.org/10.1145/3613904.3642497	include		exclude	yes
Yang, Fumeng; Huang, Zhuanyi; Scholtz, Jean; Arendt, Dustin L.	How do visual explanations foster end users' appropriate trust in machine learning?	10.1145/3377325.3377480	https://doi.org/10.1145/3377325.3377480	include		exclude	yes
Kolpaczki, Patrick, Haselbeck, Georg, Hüllermeier, Eyke	How Much Can Stratification Improve the Approximation of Shapley Values?	10.1007/978-3-031-63797-1_25	https://link.springer.com/chapter/10.1007/978-3-031-63797-1_25	exclude			yes
Koh, Seunghun; Kim, Byung Hyung; Jo, Sungho	Understanding the User Perception and Experience of Interactive Algorithmic Recourse Customization	10.1145/3674503	https://doi.org/10.1145/3674503	include		include		yes	loan application	tabular data	DiCE	DiCE + interaction priority features	lay users	30
Koh, Seunghun; Kim, Byung Hyung; Jo, Sungho	Understanding the User Perception and Experience of Interactive Algorithmic Recourse Customization	10.1145/3674503	https://doi.org/10.1145/3674503	include		include		yes	loan application	tabular data	DiCE + interaction actionable features	DiCE + interaction priority features	lay users	30																																*-
Kuhl, Ulrike, Artelt, André, Hammer, Barbara	For Better or Worse: The Impact of Counterfactual Explanations’ Directionality on User Behavior in xAI	10.1007/978-3-031-44070-0_14	https://link.springer.com/chapter/10.1007/978-3-031-44070-0_14	include		include	yes	yes	game scenario (alien zoo)	tabular data	no explanation	upward cf	lay users	161																		***+
Kuhl, Ulrike, Artelt, André, Hammer, Barbara	For Better or Worse: The Impact of Counterfactual Explanations’ Directionality on User Behavior in xAI	10.1007/978-3-031-44070-0_14	https://link.springer.com/chapter/10.1007/978-3-031-44070-0_14	include		include		yes	game scenario (alien zoo)	tabular data	downward cf	mixed cf	lay users	161																		**+
Kuhl, Ulrike, Artelt, André, Hammer, Barbara	For Better or Worse: The Impact of Counterfactual Explanations’ Directionality on User Behavior in xAI	10.1007/978-3-031-44070-0_14	https://link.springer.com/chapter/10.1007/978-3-031-44070-0_14	include		include		yes	game scenario (alien zoo)	tabular data	no explanation	mixed cf	lay users	161																		***+
Kuhl, Ulrike, Artelt, André, Hammer, Barbara	For Better or Worse: The Impact of Counterfactual Explanations’ Directionality on User Behavior in xAI	10.1007/978-3-031-44070-0_14	https://link.springer.com/chapter/10.1007/978-3-031-44070-0_14	include		include		yes	game scenario (alien zoo)	tabular data	downward cf	upward cf	lay users	161																		***+
Kuhl, Ulrike, Artelt, André, Hammer, Barbara	For Better or Worse: The Impact of Counterfactual Explanations’ Directionality on User Behavior in xAI	10.1007/978-3-031-44070-0_14	https://link.springer.com/chapter/10.1007/978-3-031-44070-0_14	include		include		yes	game scenario (alien zoo)	tabular data	mixed cf	upward cf	lay users	161																		***+
Labarta, Tobias, Kulicheva, Elizaveta, Froelian, Ronja, Geißler, Christian, Melman, Xenia, Klitzing, Julian	Study on the Helpfulness of Explainable Artificial Intelligence	10.1007/978-3-031-63803-9_16	https://link.springer.com/chapter/10.1007/978-3-031-63803-9_16	include	forward backward referencing	include	yes	yes	animal detection	image data	gradCAM	ConfidenceScore	lay users	139
Labarta, Tobias, Kulicheva, Elizaveta, Froelian, Ronja, Geißler, Christian, Melman, Xenia, Klitzing, Julian	Study on the Helpfulness of Explainable Artificial Intelligence	10.1007/978-3-031-63803-9_16	https://link.springer.com/chapter/10.1007/978-3-031-63803-9_16	include		include		yes	animal detection	image data	Integrated Gradients	ConfidenceScore	lay users	139
Berger, Patrick, von Garrel, Joerg	How to design a value-based Chatbot for the manufacturing industry: An empirical study of an internal assistance for employees	10.1007/s13218-023-00817-6	https://link.springer.com/article/10.1007/s13218-023-00817-6	include		exclude	yes
Degen, Helmut; Budnik, Christof; Gross, Ralf; Rothering, Marcel	How to Explain It to a Model Manager?: A Qualitative User Study About Understandability, Trustworthiness, Actionability, and Action Efficacy	10.1097/hnp.0000000000000327	https://link.springer.com/10.1007/978-3-031-35891-3_14	include		exclude	yes
Degen, Helmut, Budnik, Christof J., Chitre, Kunal, Lintereur, Andrew	How to Explain It to Facility Managers? A Qualitative, Industrial User Research Study for Explainability	10.1007/978-3-030-90963-5_31	https://link.springer.com/chapter/10.1007/978-3-030-90963-5_31	include		exclude	yes
Degen, Helmut, Budnik, Christof, Gross, Ralf, Rothering, Marcel	How to Explain It to a Model Manager?	10.1007/978-3-031-35891-3_14	https://link.springer.com/chapter/10.1007/978-3-031-35891-3_14	include		exclude	yes
Helen Sheridan, Emma Murphy, Dympna O'Sullivan	Human Centered Approaches and Taxonomies for Explainable Artificial Intelligence	10.1007/978-3-031-76827-9_9	http://arrow.tudublin.ie/scschcomcon/427	exclude	forward backward referencing		yes
Graefe, Julia; Paden, Selma; Engelhardt, Doreen; Bengler, Klaus	Human Centered Explainability for Intelligent Vehicles – A User Study	10.1145/3543174.3546846	https://doi.org/10.1145/3543174.3546846	include		exclude	yes
Hong, Sungsoo Ray; Hullman, Jessica; Bertini, Enrico	Human Factors in Model Interpretability: Industry Practices, Challenges, and Needs	10.1145/3392878	https://doi.org/10.1145/3392878	exclude			yes
Torres-Martos, Álvaro, Anguita-Ruiz, Augusto, Bustos-Aibar, Mireia, Cámara-Sánchez, Sofia, Alcalá, Rafael, Aguilera, Concepción M., Alcalá-Fdez, Jesús	Human Multi-omics Data Pre-processing for Predictive Purposes Using Machine Learning: A Case Study in Childhood Obesity	10.1007/978-3-031-07802-6_31	https://link.springer.com/chapter/10.1007/978-3-031-07802-6_31	exclude			yes
Lima, Gabriel; Grgić-Hlača, Nina; Cha, Meeyoung	Human Perceptions on Moral Responsibility of AI: A Case Study in AI-Assisted Bail Decision-Making	10.1145/3411764.3445260	https://doi.org/10.1145/3411764.3445260	include		exclude	yes
Sachan, Swati; Almaghrabi, Fatima; Yang, Jian-Bo; Xu, Dong-Ling	Human-AI collaboration to mitigate decision noise in financial underwriting: A study on FinTech innovation in a lending firm	https://doi.org/10.1016/j.irfa.2024.103149	https://www.sciencedirect.com/science/article/pii/S1057521924000814	exclude			yes
Alt, Benjamin; Zahn, Johannes; Kienle, Claudius; Dvorak, Julia; May, Marvin; Katic, Darko; Jäkel, Rainer; Kopp, Tobias; Beetz, Michael; Lanza, Gisela	Human-AI Interaction in Industrial Robotics: Design and Empirical Evaluation of a User Interface for Explainable AI-Based Robot Program Optimization	https://doi.org/10.1016/j.procir.2024.10.134	https://www.sciencedirect.com/science/article/pii/S2212827124012915	include		exclude	yes
Shen, Haifeng; Liao, Kewen; Liao, Zhibin; Doornberg, Job; Qiao, Maoying; van den Hengel, Anton; Verjans, Johan W.	Human-AI Interactive and Continuous Sensemaking: A Case Study of Image Classification using Scribble Attention Maps	10.1145/3411763.3451798	https://doi.org/10.1145/3411763.3451798	exclude			yes
Jenna Korentsides M.S., Joseph R. Keebler PhD, Crystal M. Fausett PhD, Sabina M. Patel M.S., Elizabeth H. Lazzara PhD	Human-AI Teams in Aviation: Considerations from Human Factors and Team Science	10.58940/2329-258x.2046	http://commons.erau.edu/jaaer/vol33/iss4/7	exclude			yes
Kim, Jenia; Maathuis, Henry; Sent, Danielle	Human-centered evaluation of explainable AI applications: a systematic review.	10.3389/frai.2024.1456486	https://www.frontiersin.org/journals/artificial-intelligence/articles/10.3389/frai.2024.1456486/full	exclude	review on user-centric xai evaluation		yes
Dawoud, Karam; Samek, Wojciech; Eisert, Peter; Lapuschkin, Sebastian; Bosse, Sebastian	Human-Centered Evaluation of XAI Methods	10.1109/ICDMW60847.2023.00122	https://ieeexplore.ieee.org/abstract/document/10411509?casa_token=CBfYa4UfGYQAAAAA:PhJ09zE7mj5SA0ruwuF8XiKgLHHI-zzThtSTh3QIlKVNIPccferWvnbRvVTali_as99trIr-UA	include		exclude	yes
Ehsan, Upol, Riedl, Mark O.	Human-Centered Explainable AI: Towards a Reflective Sociotechnical Approach	10.1007/978-3-030-60117-1_33	https://link.springer.com/chapter/10.1007/978-3-030-60117-1_33	include		exclude	yes
Schoonderwoerd, Tjeerd A. J.; Jorritsma, Wiard; Neerincx, Mark A.; Bosch, Karel van den	Human-centered XAI: Developing design patterns for explanations of clinical decision support systems	https://doi.org/10.1016/j.ijhcs.2021.102684	https://www.sciencedirect.com/science/article/pii/S1071581921001026	exclude			yes
Krishnaraj Arul OBUCHETTIAR, Alan @ Ali MADJELISI MEGARGEL	Human-centred artificial intelligence in the banking sector	10.69554/eckb7411	http://ink.library.smu.edu.sg/sis_research/7823	exclude			yes
Senthooran, Ilankaikone, Klapperstueck, Matthias, Belov, Gleb, Czauderna, Tobias, Leo, Kevin, Wallace, Mark, Wybrow, Michael, Garcia de la Banda, Maria	Human-centred feasibility restoration in practice	10.1007/s10601-023-09344-5	https://link.springer.com/article/10.1007/s10601-023-09344-5	exclude			yes
Hoem, Åsa S., Veitch, Erik, Vasstein, Kjetil	Human-centred risk assessment for a land-based control interface for an autonomous vessel	10.1007/s13437-022-00278-y	https://link.springer.com/article/10.1007/s13437-022-00278-y	exclude			yes
Caigny, Arno De; Bock, Koen W. De; Verboven, Sam	Hybrid black-box classification for customer churn prediction with segmented interpretability analysis	https://doi.org/10.1016/j.dss.2024.114217	https://www.sciencedirect.com/science/article/pii/S0167923624000502	exclude			yes
Kaneko, Tatsuya; Wada, Ryota; Ozaki, Masahiko; Inoue, Tomoya	Hybrid physics-based and machine learning model with interpretability and uncertainty for real-time estimation of unmeasurable parts	https://doi.org/10.1016/j.oceaneng.2023.115267	https://www.sciencedirect.com/science/article/pii/S0029801823016517	exclude			yes
Sabbatini, Federico; Calegari, Roberta	ICE: An Evaluation Metric to Assess Symbolic Knowledge Quality	10.1007/978-3-031-80607-0_19	https://link.springer.com/10.1007/978-3-031-80607-0_19	exclude			yes
Ebrahimi, Ali; Henriksen, Margrethe Bang Høstgaard; Brasen, Claus Lohman; Hilberg, Ole; Hansen, Torben Frøstrup; Jensen, Lars Henrik; Peimankar, Abdolrahman; Wiil, Uffe Kock	Identification of patients' smoking status using an explainable AI approach: a Danish electronic health records case study.	10.1186/s12874-024-02231-4	https://link.springer.com/article/10.1186/s12874-024-02231-4	exclude			yes
Ebrahimi, Ali, Henriksen, Margrethe Bang Høstgaard, Brasen, Claus Lohman, Hilberg, Ole, Hansen, Torben Frøstrup, Jensen, Lars Henrik, Peimankar, Abdolrahman, Wiil, Uffe Kock	Identification of patients’ smoking status using an explainable AI approach: a Danish electronic health records case study	10.1186/s12874-024-02231-4	https://link.springer.com/article/10.1186/s12874-024-02231-4	exclude			yes
Sipos, Lars; Schäfer, Ulrike; Glinka, Katrin; Müller-Birn, Claudia	Identifying Explanation Needs of End-users: Applying and Extending the XAI Question Bank	10.1145/3603555.3608551	https://doi.org/10.1145/3603555.3608551	include		exclude	yes
Hui Shan LEE	Implementation and evaluation of AI-based Citizen Question-Answer Recommender (ACQAR) to enhance citizen service delivery in Singapore public sector: A case study	10.1177/00953997241238182	http://ink.library.smu.edu.sg/etd_coll/562	exclude			yes
Hamon, Ronan; Junklewitz, Henrik; Malgieri, Gianclaudio; Hert, Paul De; Beslay, Laurent; Sanchez, Ignacio	Impossible Explanations? Beyond explainable AI in the GDPR from a COVID-19 use case scenario	10.1145/3442188.3445917	https://doi.org/10.1145/3442188.3445917	include		exclude	yes
Kim, Byung Hyung; Koh, Seunghun; Huh, Sejoon; Jo, Sungho; Choi, Sunghee	Improved Explanatory Efficacy on Human Affect and Workload Through Interactive Process in Artificial Intelligence	10.1109/ACCESS.2020.3032056	https://ieeexplore.ieee.org/abstract/document/9229108	exclude	evaluation metric		yes
Obster, Fabian; Brand, Josephine; Ciolacu, Monica; Humpe, Andreas	Improving Boosted Generalized Additive Models with Random Forests: A Zoo Visitor Case Study for Smart Tourism	https://doi.org/10.1016/j.procs.2022.12.214	https://www.sciencedirect.com/science/article/pii/S187705092202292X	exclude			yes
Dang, Huong N.; Chang, KC; Chen, Genshe; Chen, Hua-mei; Khan, Simon; Franco, Milvio; Blasch, Erik	Improving Condition-Based Maintenance Transparency Through Causal explanations: An Aircraft Maintenance Scheduling Case Study	10.1109/NAECON61878.2024.10670683	https://ieeexplore.ieee.org/abstract/document/10670683?casa_token=J1jJ-wpothwAAAAA:zKjjPCYDE6FeBmoFY57Dki53F6cq7SQXaSx-1zqiJTLCj5Ry9XBaXciJOWjNXyBHZF2g390gNA	exclude			yes
Sun, Jimin; Shi, Wenqi; Giuste, Felipe O.; Vaghani, Yog S.; Tang, Lingzi; Wang, May D.	Improving explainable AI with patch perturbation-based evaluation pipeline: a COVID-19 X-ray image analysis case study.	10.1038/s41598-023-46493-2	https://www.nature.com/articles/s41598-023-46493-2	exclude	no user-study		yes
Hadash, Sophia; Willemsen, Martijn C.; Snijders, Chris; IJsselsteijn, Wijnand A.	Improving understandability of feature contributions in model-agnostic explainable AI tools	10.1145/3491102.3517650	https://doi.org/10.1145/3491102.3517650	include		exclude	yes
Wu, Aoyu; Deng, Dazhen; Cheng, Furui; Wu, Yingcai; Liu, Shixia; Qu, Huamin	In Defence of Visual Analytics Systems: Replies to Critics	10.1109/TVCG.2022.3209360	https://ieeexplore.ieee.org/abstract/document/9906559?casa_token=hTVmi5ovNbsAAAAA:Cfo_Zsuebxpe7vNHMiY8ye3v9fPL1HOY1xhR9HQJ6d-mEaLc8vOxF-s9p7o8Piq0Cz2hZRQcWg	exclude			yes
Atakishiyev, Shahin; Salameh, Mohammad; Goebel, Randy	Incorporating Explanations into Human-Machine Interfaces for Trust and Situation Awareness in Autonomous Vehicles	10.1109/IV55156.2024.10588812	https://arxiv.org/abs/2404.07383	include		exclude	yes
Graaff, Thies, Wild, Michael, Werner, Tino, Möhlmann, Eike, Seibt, Stefan, Ebrecht, Benjamin	Increasing Explainability in Time Series Classification by Functional Decomposition	10.1007/978-3-031-63803-9_7	https://link.springer.com/chapter/10.1007/978-3-031-63803-9_7	exclude			yes
Schneider, Tobias; Ghellal, Sabiha; Love, Steve; Gerlicher, Ansgar R.S.	Increasing the User Experience in Autonomous Driving through different Feedback Modalities	10.1145/3397481.3450687	https://doi.org/10.1145/3397481.3450687	include		exclude	yes
Hoffman, Robert R., Miller, Timothy, Klein, Gary, Mueller, Shane T., Clancey, William J.	Increasing the Value of XAI for Users: A Psychological Perspective	10.1007/s13218-023-00806-9	https://link.springer.com/article/10.1007/s13218-023-00806-9	exclude			yes
Kalyakulina, Alena; Yusipov, Igor; Kondakova, Elena; Sivtseva, Tatiana; Zakharova, Raisa; Semenov, Sergey; Klimova, Tatiana; Ammosova, Elena; Trukhanov, Arseniy; Franceschi, Claudio; Ivanchenko, Mikhail	Inflammaging Markers in the Extremely Cold Climate: A Case Study of Yakutian Population.	10.3390/ijms252413741	https://pubmed.ncbi.nlm.nih.gov/39769502/	exclude			yes
Murray, Bryce J., Anderson, Derek T., Havens, Timothy C., Wilkin, Tim, Wilbik, Anna	Information Fusion-2-Text: Explainable Aggregation via Linguistic Protoforms	10.1007/978-3-030-50153-2_9	https://link.springer.com/chapter/10.1007/978-3-030-50153-2_9	include		exclude	yes
Dolci, Giorgio; Morasso, Cristian; Cruciani, Federica; Brusini, Lorenza; Pini, Lorenzo; Calhoun, Vince D.; Galazzo, Ilaria Boscolo; Menegaz, Gloria	Integrated Gradients Demystified: An MRI Case Study on Aβ-T Protein Localization	10.1109/MetroXRAINE62247.2024.10796298	https://ieeexplore.ieee.org/document/10796298	exclude			yes
Chiu, Ming-Chuan; Yang, Li-Sheng	Integrating explainable AI and depth cameras to achieve automation in grasping Operations: A case study of shoe company	https://doi.org/10.1016/j.aei.2024.102583	https://www.sciencedirect.com/science/article/pii/S1474034624002313	exclude			yes
Pineda-Jaramillo, Juan; Munoz, Claudia; Mesa-Arango, Rodrigo; Gonzalez-Calderon, Carlos; Lange, Anne	Integrating multiple data sources for improved flight delay prediction using explainable machine learning	https://doi.org/10.1016/j.rtbm.2024.101161	https://www.sciencedirect.com/science/article/pii/S2210539524000634	exclude			yes
Jeyasothy, Adulam, Laugel, Thibault, Lesot, Marie-Jeanne, Marsala, Christophe, Detyniecki, Marcin	Integrating Prior Knowledge in Post-hoc Explanations	10.1007/978-3-031-08974-9_56	https://link.springer.com/chapter/10.1007/978-3-031-08974-9_56	include		exclude	yes
Labarta, Tobias, Kulicheva, Elizaveta, Froelian, Ronja, Geißler, Christian, Melman, Xenia, Klitzing, Julian	Study on the Helpfulness of Explainable Artificial Intelligence	10.1007/978-3-031-63803-9_16	https://link.springer.com/chapter/10.1007/978-3-031-63803-9_16	include		include		yes	animal detection	image data	LIME	ConfidenceScore	lay users	139
Chandramouli, Suyog; Zhu, Yifan; Oulasvirta, Antti	Interactive Personalization of Classifiers for Explainability using Multi-Objective Bayesian Optimization	10.1145/3565472.3592956	https://doi.org/10.1145/3565472.3592956	include		exclude	yes
Sequeira, Pedro; Gervasio, Melinda	Interestingness elements for explainable reinforcement learning: Understanding agents' capabilities and limitations	https://doi.org/10.1016/j.artint.2020.103367	https://www.sciencedirect.com/science/article/pii/S000437022030117X	include		exclude	yes
Bhattacharya, Pronaya; Obaidat, Mohammad S.; Sanghavi, Sakshi; Sakariya, Vatsal; Tanwar, Sudeep; Hsiao, Kuei-Fang	Internet-of-Explainable-Digital-Twins: A Case Study of Versatile Corn Production Ecosystem	10.1109/CCCI55352.2022.9926502	https://ieeexplore.ieee.org/abstract/document/9926502	exclude			yes
Salles, Isadora, Mejia-Domenzain, Paola, Swamy, Vinitra, Blackwell, Julian, Käser, Tanja	Interpret3C: Interpretable Student Clustering Through Individualized Feature Selection	10.1007/978-3-031-64315-6_35	https://link.springer.com/chapter/10.1007/978-3-031-64315-6_35	exclude			yes
Waa, Jasper van der; Schoonderwoerd, Tjeerd; Diggelen, Jurriaan van; Neerincx, Mark	Interpretable confidence measures for decision support systems	https://doi.org/10.1016/j.ijhcs.2020.102493	https://www.sciencedirect.com/science/article/pii/S1071581920300951	exclude			yes
Nagy, Marcell, Molontay, Roland	Interpretable Dropout Prediction: Towards XAI-Based Personalized Intervention	10.1007/s40593-023-00331-8	https://link.springer.com/article/10.1007/s40593-023-00331-8	include		exclude	yes
Neves, Inês; Folgado, Duarte; Santos, Sara; Barandas, Marília; Campagner, Andrea; Ronzio, Luca; Cabitza, Federico; Gamboa, Hugo	Interpretable heartbeat classification using local model-agnostic explanations on ECGs.	10.1016/j.compbiomed.2021.104393	https://www.sciencedirect.com/science/article/abs/pii/S0010482521001876	include		exclude	yes
Matin, Mahmood; Dehghanian, Amir; Zeinaddini, Amir Hossein; Darijani, Hossein	Interpretable machine learning modeling of temperature rise in a medium voltage switchgear using multiphysics CFD analysis	https://doi.org/10.1016/j.csite.2024.105585	https://www.sciencedirect.com/science/article/pii/S2214157X24016162	exclude			yes
Joung, Junegak; Kim, Harrison	Interpretable machine learning-based approach for customer segmentation for new product development from online product reviews	https://doi.org/10.1016/j.ijinfomgt.2023.102641	https://www.sciencedirect.com/science/article/pii/S0268401223000221	exclude			yes
Kostopoulos, Georgios; Panagiotakopoulos, Theodor; Kotsiantis, Sotiris; Pierrakeas, Christos; Kameas, Achilles	Interpretable Models for Early Prediction of Certification in MOOCs: A Case Study on a MOOC for Smart City Professionals	10.1109/ACCESS.2021.3134787	https://ieeexplore.ieee.org/abstract/document/9646955	exclude			yes
Yao, Zhiyuan; Wang, Zhaocai; Huang, Jinghan; Xu, Nannan; Cui, Xuefei; Wu, Tunhua	Interpretable prediction, classification and regulation of water quality: A case study of Poyang Lake, China.	10.1016/j.scitotenv.2024.175407	https://www.sciencedirect.com/science/article/abs/pii/S0048969724055578	exclude			yes
Bottieau, Jérémie; Wang, Yi; De Grève, Zacharie; Vallée, François; Toubeau, Jean-François	Interpretable Transformer Model for Capturing Regime Switching Effects of Real-Time Electricity Prices	10.1109/TPWRS.2022.3195970	https://ieeexplore.ieee.org/abstract/document/9849032?casa_token=LljgO8v4cdAAAAAA:gemuSvWmg8Xycr62S3pIJISIzz1pfxSfzgyV-33zb6KylGtuS_tXO7zwvvdUDWyhN4AK16l_3w	exclude			yes
Devroye, N.; Mohammadi, N.; Mulgund, A.; Naik, H.; Shekhar, R.; Turán, Gy.; Wei, Y.; Žefran, M.	Interpreting Deep-Learned Error-Correcting Codes	10.1109/ISIT50566.2022.9834599	https://ieeexplore.ieee.org/abstract/document/9834599?casa_token=yXcPGvpZItkAAAAA:Dwq_W5mTogpiFLVUlQkqi8Du3g5JeW_a6c7me6lcxMMiOZOvWpH51b_BYwQXLvCFz0cRgxfSfw	exclude			yes
Prasant Kumar Mohanty, Gayadhar Panda, Malabika Basu, Diptendu Sinha Roy	Interpreting Energy Utilisation With Shapley Additive Explanations by Defining a Synthetic Data Generator for Plausible Charging Sessions of Electric Vehicles	10.1109/icepe57949.2023.10201554	http://arrow.tudublin.ie/engscheleart2/370	exclude			yes
Jiang, Junqi; Leofante, Francesco; Rago, Antonio; Toni, Francesca	Interval abstractions for robust counterfactual explanations	https://doi.org/10.1016/j.artint.2024.104218	https://www.sciencedirect.com/science/article/pii/S0004370224001541	exclude			yes
Choi, JunYoung; Park, Sohee; Koh, GaYeon; Kim, Youngseo; Jeong, Won-Ki	Intuitive Design of Deep Learning Models through Visual Feedback	10.1109/VIS55277.2024.00030	https://ieeexplore.ieee.org/abstract/document/10771115	include		exclude	yes
Wahbah, Maisam; Alkhidir, Tamador; Halawani, Yasmin	Investigating the Connection Between Teachers' Factors and Students' Performance in Mathematics: A UAE Case Study	10.1109/FIE58773.2023.10343036	https://ieeexplore.ieee.org/abstract/document/10343036?casa_token=aF2FFv0qeDgAAAAA:nYFEMF3ON4aHyM2RiBBbbbX2FCyDoC9V90FS4l2rlVbugUz6tCu8MUOcvC7-gnkrvdWw2yHYFQ	exclude			yes
Ke, Entong; Zhao, Juchao; Zhao, Yaolong	Investigating the influence of nonlinear spatial heterogeneity in urban flooding factors using geographic explainable artificial intelligence	https://doi.org/10.1016/j.jhydrol.2024.132398	https://www.sciencedirect.com/science/article/pii/S0022169424017943	exclude			yes
Labarta, Tobias, Kulicheva, Elizaveta, Froelian, Ronja, Geißler, Christian, Melman, Xenia, Klitzing, Julian	Study on the Helpfulness of Explainable Artificial Intelligence	10.1007/978-3-031-63803-9_16	https://link.springer.com/chapter/10.1007/978-3-031-63803-9_16	include	forward backward referencing	include		yes	animal detection	image data	LRP	ConfidenceScore	lay users	139
Labarta, Tobias, Kulicheva, Elizaveta, Froelian, Ronja, Geißler, Christian, Melman, Xenia, Klitzing, Julian	Study on the Helpfulness of Explainable Artificial Intelligence	10.1007/978-3-031-63803-9_16	https://link.springer.com/chapter/10.1007/978-3-031-63803-9_16	include	forward backward referencing	include		yes	animal detection	image data	SHAP	ConfidenceScore	lay users	139
Matsuyama, Hitoshi; Kawaguchi, Nobuo; Lim, Brian Y	IRIS: Interpretable Rubric-Informed Segmentation for Action Quality Assessment	10.1145/3581641.3584048	https://doi.org/10.1145/3581641.3584048	include		exclude	yes
Gupta, Tarun; Kutty, Libin; Gahir, Ritu; Ukwu, Nnamdi; Polley, Sayantan; Thiel, Marcus	IRTEX: Image Retrieval with Textual Explanations	10.1109/ICHMS53169.2021.9582666	https://ieeexplore.ieee.org/abstract/document/9582666?casa_token=4mwo83Rbo-QAAAAA:DdiqPsiWbd6J7RD9Tqns0jJeHYVEw0P7QkjxJoDqqx5pbYgLNPF6DmLpHnBKXa_lOK9JhU25rw	include		exclude	yes
Coscia, Adam; Holmes, Langdon; Morris, Wesley; Choi, Joon Suh; Crossley, Scott; Endert, Alex	iScore: Visual Analytics for Interpreting How Language Models Automatically Score Summaries	10.1145/3640543.3645142	https://doi.org/10.1145/3640543.3645142	include		exclude	yes
Papenmeier, Andrea; Kern, Dagmar; Englebienne, Gwenn; Seifert, Christin	It’s Complicated: The Relationship between User Trust, Model Accuracy and Explanations in AI	10.1145/3495013	https://doi.org/10.1145/3495013	include		exclude	yes
Pornprasit, Chanathip; Tantithamthavorn, Chakkrit Kla	JITLine: A Simpler, Better, Faster, Finer-grained Just-In-Time Defect Prediction	10.1109/MSR52588.2021.00049	https://ieeexplore.ieee.org/abstract/document/9463103?casa_token=vWApGkn0Py8AAAAA:Df8Vgx97UZV7lRczl0_eSMV4Feri6d5sJ7YKkVK7nKQ28sA9o57QosnGuAnviRhROpkTVfEdqA	exclude			yes
Gao, Xiaofeng; Gong, Ran; Zhao, Yizhou; Wang, Shu; Shu, Tianmin; Zhu, Song-Chun	Joint Mind Modeling for Explanation Generation in Complex Human-Robot Collaborative Tasks	10.1109/RO-MAN47096.2020.9223595	https://ieeexplore.ieee.org/abstract/document/9223595?casa_token=GaPbNiDDuGkAAAAA:bQ6wg14b44Axg0EpLVyBy_fQwId6vIvUBXIcP1vN_mcEO2zkoR7DiudrpVsBeSX_hQVNvKqGsQ	include		exclude	yes
Kuhl, Ulrike; Artelt, André; Hammer, Barbara	Keep Your Friends Close and Your Counterfactuals Closer: Improved Learning From Closest Rather Than Plausible Counterfactual Explanations in an Abstract Setting	10.1145/3531146.3534630	https://doi.org/10.1145/3531146.3534630	include		exclude	yes		game scenario (alien zoo)	tabular data	closest counterfactual	plausible counterfactual	lay users	100																		***-
Wall, Julie	Keynote Speech 4: A Conversational AI Approach to Detecting Deception and Tackling Insurance Fraud	10.1109/ICICIS52592.2021.9694118	https://ieeexplore.ieee.org/abstract/document/9694118	exclude			yes
Kojima, Ryosuke; Ishida, Shoichi; Ohta, Masateru; Iwata, Hiroaki; Honma, Teruki; Okuno, Yasushi	kGCN: a graph-based deep learning framework for chemical structures.	10.1186/s13321-020-00435-6	https://link.springer.com/article/10.1186/s13321-020-00435-6	exclude			yes
He, Gaole; Kuiper, Lucie; Gadiraju, Ujwal	Knowing About Knowing: An Illusion of Human Competence Can Hinder Appropriate Reliance on AI Systems	10.1145/3544548.3581025	https://doi.org/10.1145/3544548.3581025	include		exclude	yes
Rožanec, Jože M.; Fortuna, Blaž; Mladenić, Dunja	Knowledge graph-based rich and confidentiality preserving Explainable Artificial Intelligence (XAI)	https://doi.org/10.1016/j.inffus.2021.11.015	https://www.sciencedirect.com/science/article/pii/S1566253521002414	exclude			yes
Wu, Yulei; Lin, Guozhi; Ge, Jingguo	Knowledge-Powered Explainable Artificial Intelligence for Network Automation toward 6G	10.1109/MNET.005.2100541	https://ieeexplore.ieee.org/abstract/document/9829396	exclude			yes
Iatrellis, Omiros; Samaras, Nicholas; Dervenis, Charalampos; Panagiotakopoulos, Theodor	KONX: A Dynamic Approach for Explainable AI in Higher Education	10.1145/3631908.3631925	https://doi.org/10.1145/3631908.3631925	exclude			yes
Lai, V; Tan, C.	On Human Predictions with Explanations and Predictions of Machine Learning Models: A Case Study on Deception Detection	10.1145/3287560.3287590	https://dl.acm.org/doi/abs/10.1145/3287560.3287590	include	From Backward referencing	include	yes	yes	deception detection	Natural Language	no explanation	example based	lay users	80										***+
Lai, V; Tan, C.	On Human Predictions with Explanations and Predictions of Machine Learning Models: A Case Study on Deception Detection	10.1145/3287560.3287590	https://dl.acm.org/doi/abs/10.1145/3287560.3287590	include	From Backward referencing	include		yes	deception detection	Natural Language	no explanation	accuracy	lay users	80										***+
Lai, V; Tan, C.	On Human Predictions with Explanations and Predictions of Machine Learning Models: A Case Study on Deception Detection	10.1145/3287560.3287590	https://dl.acm.org/doi/abs/10.1145/3287560.3287590	include	From Backward referencing	include		yes	deception detection	Natural Language	no explanation	text highlighting	lay users	80										***+
Lee, Benjamin Charles Germain; Downey, Doug; Lo, Kyle; Weld, Daniel S.	LIMEADE: From AI Explanations to Advice Taking	10.1145/3589345	https://doi.org/10.1145/3589345	include		include	yes	yes	search engines	tabular/text	no explanation	LIMEADE (LIME+ Feedback interaction)	domain experts	21										*+														*+										*+
Leichtmann, Benedikt; Humer, Christina; Hinterreiter, Andreas; Streit, Marc; Mara, Martina	Effects of Explainable Artificial Intelligence on trust and human behavior in a high-risk decision task	https://doi.org/10.1016/j.chb.2022.107539	https://www.sciencedirect.com/science/article/pii/S0747563222003594	include		include	yes	yes	image detection (mushroom classification)	image data	no explanation	GradCAM + example based	lay users	410											***-																			*-				**-
Kim, Chris; Lin, Xiao; Collins, Christopher; Taylor, Graham W.; Amer, Mohamed R.	Learn, Generate, Rank, Explain: A Case Study of Visual Explanation by Generative Machine Learning	10.1145/3465407	https://doi.org/10.1145/3465407	include		exclude	yes		motion detection	image time series (video=	no explanation
Ehlers, Rüdiger; Gavran, Ivan; Neider, Daniel	Learning Properties in LTL ∩ ACTL from Positive Examples Only	10.34727/2020/isbn.978-3-85448-042-6_17	https://library.oapen.org/bitstream/handle/20.500.12657/49587/1/9783854480426.pdf#page=118	exclude			yes
Mertes, Silvan; Huber, Tobias; Weitz, Katharina; Heimerl, Alexander; André, Elisabeth	GANterfactual-Counterfactual Explanations for Medical Non-experts Using Generative Adversarial Learning.	10.3389/frai.2022.825565	https://www.frontiersin.org/journals/artificial-intelligence/articles/10.3389/frai.2022.825565/full	include		include		yes	healthcare	image data	LIME	GANterfactual	lay users	118													**+	**+								**+
Mertes, Silvan; Huber, Tobias; Weitz, Katharina; Heimerl, Alexander; André, Elisabeth	GANterfactual-Counterfactual Explanations for Medical Non-experts Using Generative Adversarial Learning.	10.3389/frai.2022.825565	https://www.frontiersin.org/journals/artificial-intelligence/articles/10.3389/frai.2022.825565/full	include		include	yes	yes	healthcare	image data	LPR	GANterfactual	lay users	118										*+			**+	***+								**+
Cabitza, Federico, Campagner, Andrea, Famiglini, Lorenzo, Natali, Chiara, Caccavella, Valerio, Gallazzi, Enrico	Let Me Think! Investigating the Effect of Explanations Feeding Doubts About the AI Advice	10.1007/978-3-031-40837-3_10	https://link.springer.com/chapter/10.1007/978-3-031-40837-3_10	include		exclude	yes
Hao, Zhiyong; Wu, Junfeng; Liu, Tingting; Chen, Xiaohong	Leveraging Cognitive Context Knowledge for Argumentation-Based Object Classification in Multi-Sensor Networks	10.1109/ACCESS.2019.2919073	https://ieeexplore.ieee.org/abstract/document/8723041	exclude			yes
Nguyen, Su; O’Keefe, Greg; Arisian, Sobhan; Trentelman, Kerry; Alahakoon, Damminda	Leveraging explainable AI for enhanced decision making in humanitarian logistics: An Adversarial CoevoluTION (ACTION) framework	https://doi.org/10.1016/j.ijdrr.2023.104004	https://www.sciencedirect.com/science/article/pii/S2212420923004843	exclude			yes
Li, Ziqi	Leveraging explainable artificial intelligence and big trip data to understand factors influencing willingness to ridesharing	https://doi.org/10.1016/j.tbs.2022.12.006	https://www.sciencedirect.com/science/article/pii/S2214367X22001466	exclude			yes
Ghassabi, Sahar; Behkamal, Behshid; Milani, Mostafa	Leveraging Knowledge Graphs for Matching Heterogeneous Entities and Explanation	10.1109/BigData59044.2023.10386157	https://ieeexplore.ieee.org/abstract/document/10386157?casa_token=QsKGrul_7XYAAAAA:xvNKHlbIxLcM33t28L19SNCUE6Cl7QMifHGLaQKzUOsNTsneaF296OgwPRflix8vHxaQU2GN5A	include		exclude	yes
Kalir, Adar A.; Lo, Sin Kit; Goldberg, Gavan; Zingerman-Koladko, Irena; Ohana, Aviv; Revah, Yossi; Chimol, Tsvi Ben; Honig, Gavriel	Leveraging Machine Learning for Capacity and Cost on a Complex Toolset: A Case Study	10.1109/TSM.2023.3314431	https://ieeexplore.ieee.org/abstract/document/10247612?casa_token=Up9RbkUQpuAAAAAA:n82Z8-4JSRPoBH3mf1WVrHJv6c2p_ocj7O7_9V-2-yjRMrxNHCz8bApufRopcAOose-GS7PcsQ	exclude			yes
Das, Devleena; Chernova, Sonia	Leveraging rationales to improve human task performance	10.1145/3377325.3377512	https://doi.org/10.1145/3377325.3377512	include		exclude	yes	yes	game theory (chess)	probably tbular	Hints	RGA + knowledge based info	domain experts	68
Das, Devleena; Chernova, Sonia	Leveraging rationales to improve human task performance	10.1145/3377325.3377512	https://doi.org/10.1145/3377325.3377512	include		exclude		yes	game theory (chess)	probably tbular	no explanation	RGA + knowledge based info	domain experts	68
Huang, Jih-Jeng; Chen, Chin-Yi	Leveraging the hierarchical symmetric 2-Additive Choquet Integral: Enhancing explainability and parallelizability in predictive models	https://doi.org/10.1016/j.ins.2024.121031	https://www.sciencedirect.com/science/article/pii/S0020025524009459	exclude			yes
Naiseh, Mohammad; Al-Thani, Dena; Jiang, Nan; Ali, Raian	How the different explanation classes impact trust calibration: The case of clinical decision support systems	https://doi.org/10.1016/j.ijhcs.2022.102941	https://www.sciencedirect.com/science/article/pii/S1071581922001616	include		include		yes	healthcare (dss)	tabular data	global feature importance	Counterfactual	domain experts	41																													min *+
Kim, Junetae; Lee, Sangwon; Hwang, Eugene; Ryu, Kwang Sun; Jeong, Hanseok; Lee, Jae Wook; Hwangbo, Yul; Choi, Kui Son; Cha, Hyo Soung	Limitations of Deep Learning Attention Mechanisms in Clinical Research: Empirical Case Study Based on the Korean Diabetic Disease Setting	https://doi.org/10.2196/18418	https://www.sciencedirect.com/science/article/pii/S143888712001136X	exclude			yes
Kim, Junetae; Lee, Sangwon; Hwang, Eugene; Ryu, Kwang Sun; Jeong, Hanseok; Lee, Jae Wook; Hwangbo, Yul; Choi, Kui Son; Cha, Hyo Soung	Limitations of Deep Learning Attention Mechanisms in Clinical Research: Empirical Case Study Based on the Korean Diabetic Disease Setting.	10.2196/18418	https://www.jmir.org/2020/12/e18418/	exclude			yes
Karamanou, Areti; Kalampokis, Evangelos; Tarabanis, Konstantinos	Linked Open Government Data to Predict and Explain House Prices: The Case of Scottish Statistics Portal	https://doi.org/10.1016/j.bdr.2022.100355	https://www.sciencedirect.com/science/article/pii/S2214579622000491	exclude			yes
Neghawi, Elie; Wang, Zerui; Huang, Jun; Liu, Yan	Linking Team-level and Organization-level Governance in Machine Learning Operations through Explainable AI and Responsible AI Connector	10.1109/COMPSAC57700.2023.00185	https://ieeexplore.ieee.org/abstract/document/10197114?casa_token=cW_ZfEy9YiMAAAAA:yMuA1OzQjBC-Du1WcBShymI95VDZzhuCFPL3_ZvHYwiQsqVY5W1aECsw25ubPqbz-Kdb1uQmkQ	exclude			yes
Fulane, Gefra; Major, Maria; Lorenzoni, Cesaltina	Living in the Minds of Others: How Pudor and Social Judgements Affect Women's Cervical Cancer Screening Uptake in Mozambique?	10.1002/hpm.3881	https://pubmed.ncbi.nlm.nih.gov/39658457/	exclude			yes
Huber, Tobias; Weitz, Katharina; André, Elisabeth; Amir, Ofra	Local and global explanations of agent behavior: Integrating strategy summaries with saliency maps	https://doi.org/10.1016/j.artint.2021.103571	https://www.sciencedirect.com/science/article/pii/S0004370221001223	include		exclude	yes
Lai, Lai; Liu, Yuchen; Zhang, Yuchao; Cao, Zhen; Yin, Yuepeng; Chen, Xi; Jin, Jiale; Wu, Shuimu	Long-term spatiotemporal mapping in lacustrine environment by remote sensing:Review with case study, challenges, and future directions	https://doi.org/10.1016/j.watres.2024.122457	https://www.sciencedirect.com/science/article/pii/S0043135424013563	exclude			yes
Lai, Lai; Liu, Yuchen; Zhang, Yuchao; Cao, Zhen; Yin, Yuepeng; Chen, Xi; Jin, Jiale; Wu, Shuimu	Long-term spatiotemporal mapping in lacustrine environment by remote sensing:Review with case study, challenges, and future directions.	10.1016/j.watres.2024.122457	https://www.sciencedirect.com/science/article/abs/pii/S0043135424013563	exclude	review		yes
Spitzer, Philipp; Celis, Sebastian; Martin, Dominik; Kühl, Niklas; Satzger, Gerhard	Looking Through the Deep Glasses: How Large Language Models Enhance Explainability of Deep Learning Models	10.1145/3670653.3677488	https://doi.org/10.1145/3670653.3677488	include		exclude	yes
Tedeschi, Miriam, Viljanen, Mika	Lost in Transduction: From Law and Code’s Intra-actions to the Right to Explanation in the European Data Protection Regulations	10.1007/s10978-023-09352-7	https://link.springer.com/article/10.1007/s10978-023-09352-7	exclude			yes
Dell’Anna, Federico	Machine learning framework for evaluating energy performance certificate (EPC) effectiveness in real estate: A case study of Turin’s private residential market	https://doi.org/10.1016/j.enpol.2024.114407	https://www.sciencedirect.com/science/article/pii/S0301421524004270	exclude			yes
Du, Yuhan; McNestry, Catherine; Wei, Lan; Antoniadi, Anna Markella; McAuliffe, Fionnuala M.; Mooney, Catherine	Machine learning-based clinical decision support systems for pregnancy care: A systematic review.	10.1016/j.ijmedinf.2023.105040	https://www.sciencedirect.com/science/article/pii/S1386505623000588	exclude	review on cdss		yes
Chen, Yong; Lu, Zhiyuan; Liu, Heng; Wang, Hu; Zheng, Zunqing; Wang, Changhui; Sun, Xingyu; Xu, Linxun; Yao, Mingfa	Machine learning-based design of target property-oriented fuels using explainable artificial intelligence	https://doi.org/10.1016/j.energy.2024.131583	https://www.sciencedirect.com/science/article/pii/S0360544224013562	exclude			yes
Ferreira, Eduardo Vargas, Lorena, Ana Carolina	Machine Teaching: An Explainable Machine Learning Model for Individualized Education	10.1007/978-3-031-45368-7_21	https://link.springer.com/chapter/10.1007/978-3-031-45368-7_21	include		exclude	yes
Banerjee, Puja; Raj, Siddhartha; Barnwal, Dr. Rajesh P.	Machine versus Human Attention: A comparative study of different transfer learning models	10.1145/3570991.3571026	https://doi.org/10.1145/3570991.3571026	include		exclude	yes
Ghajargar, Maliheh; Bardzell, Jeffrey	Making AI Understandable by Making it Tangible: Exploring the Design Space with Ten Concept Cards	10.1145/3572921.3572942	https://doi.org/10.1145/3572921.3572942	include		exclude	yes
Chromik, Michael	Making SHAP Rap: Bridging Local and Global Insights Through Interaction and Narratives	10.1007/978-3-030-85616-8_37	https://link.springer.com/chapter/10.1007/978-3-030-85616-8_37	include		exclude	yes
Volkmar, Gioia V.	Managerial Decisions in Marketing: The Individual Perception of Explainable Artificial Intelligence	10.1007/978-981-16-9268-0_2	https://link.springer.com/chapter/10.1007/978-981-16-9268-0_2	include		exclude	yes
Yilmaz, Elif Ozlem, Tonbul, Hasan, Kavzoglu, Taskin	Marine mucilage mapping with explained deep learning model using water-related spectral indices: a case study of Dardanelles Strait, Turkey	10.1007/s00477-023-02560-8	https://link.springer.com/article/10.1007/s00477-023-02560-8	exclude			yes
Yang, Jian-Bo; Xu, Dong-Ling	Maximum Likelihood Evidential Reasoning	https://doi.org/10.1016/j.artint.2025.104289	https://www.sciencedirect.com/science/article/pii/S0004370225000086	exclude			yes
Setu, Jyotirmay Nag; Le, Joshua M; Kundu, Ripan Kumar; Giesbrecht, Barry; Höllerer, Tobias; Hoque, Khaza Anuarul; Desai, Kevin; Quarles, John	Mazed and Confused: A Dataset of Cybersickness, Working Memory, Mental Load, Physical Load, and Attention During a Real Walking Task in VR	10.1109/ISMAR62088.2024.00121	https://ieeexplore.ieee.org/abstract/document/10765425	exclude			yes
Grau, Isel, Nápoles, Gonzalo, Hoitsma, Fabian, Koumeri, Lisa Koutsoviti, Vanhoof, Koen	Measuring Implicit Bias Using SHAP Feature Importance and Fuzzy Cognitive Maps	10.1007/978-3-031-47721-8_50	https://link.springer.com/chapter/10.1007/978-3-031-47721-8_50	exclude			yes
Kou, Yubo; Gui, Xinning	Mediating Community-AI Interaction through Situated Explanation: The Case of AI-Led Moderation	10.1145/3415173	https://doi.org/10.1145/3415173	exclude			yes
Iantovics, László Barna; Enăchescu, Călin	Method for Data Quality Assessment of Synthetic Industrial Data.	10.3390/s22041608	https://www.mdpi.com/1424-8220/22/4/1608	exclude			yes
Alotaibi, Hissah, Singh, Ronal	Metrics for Evaluating Actionability in Explainable AI	10.1007/978-981-99-7022-3_44	https://link.springer.com/chapter/10.1007/978-981-99-7022-3_44	exclude			yes
Narkar, Shweta; Zhang, Yunfeng; Liao, Q. Vera; Wang, Dakuo; Weisz, Justin D.	Model LineUpper: Supporting Interactive Model Comparison at Multiple Levels for AutoML	10.1145/3397481.3450658	https://doi.org/10.1145/3397481.3450658	exclude			yes
Filtjens, Benjamin; Ginis, Pieter; Nieuwboer, Alice; Afzal, Muhammad Raheel; Spildooren, Joke; Vanrumste, Bart; Slaets, Peter	Modelling and identification of characteristic kinematic features preceding freezing of gait with convolutional neural networks and layer-wise relevance propagation.	10.1186/s12911-021-01699-0	https://link.springer.com/article/10.1186/s12911-021-01699-0	exclude			yes
Grimm, Valentin; Potthast, Jonas; Rubart, Jessica	Motivational Exploration of Explanations in Industrial Analytics*	10.1109/INDIN51400.2023.10217864	https://ieeexplore.ieee.org/abstract/document/10217864?casa_token=gBAaXWU4y68AAAAA:BMBcKzLe2T1_b9N-mEAI4bRdfvlTahRPPEphVkQBn_0u-eA24Q2-UXAtXxHWK8UinvDgUYJ5SQ	include		exclude	yes
Arabikhan, Farzad, Gegov, Alexander, Taheri, Rahim, Akbari, Negar, Bader-EI-Den, Mohamed	Moving Towards Explainable Artificial Intelligence Using Fuzzy Rule-Based Networks in Decision-Making Process	10.1007/978-3-031-51664-1_21	https://link.springer.com/chapter/10.1007/978-3-031-51664-1_21	include		exclude	yes
Titoriya, Ankit Kumar, Singh, Maheshwari Prasad, Singh, Amit Kumar	MTUNet + + : explainable few-shot medical image classification with generative adversarial network	10.1007/s11042-024-19316-3	https://link.springer.com/article/10.1007/s11042-024-19316-3	exclude			yes
Pandya, Ravi; Zhao, Michelle; Liu, Changliu; Simmons, Reid; Admoni, Henny	Multi-Agent Strategy Explanations for Human-Robot Collaboration	10.1109/ICRA57147.2024.10610720	https://ieeexplore.ieee.org/abstract/document/10610720?casa_token=asJX2Yn1RWYAAAAA:aJh-NzCPbbWRCCC94wH7R2-am4YZlm13i06zKxVeahcyVzFgPWjH1rZ9ImfITD7ZKtlSOL7k5g	include		exclude	yes
Maqsood, Sarmad; Damaševičius, Robertas; Maskeliūnas, Rytis	Multi-Modal Brain Tumor Detection Using Deep Neural Network and Multiclass SVM.	10.3390/medicina58081090	https://www.mdpi.com/1648-9144/58/8/1090	exclude			yes
Nighat Bibi, Jane Courtney, Kathleen M. Curran	Multiple sclerosis diagnosis with deep learning and explainable AI	10.1049/icp.2024.3308	http://arrow.tudublin.ie/engscheleart/393	exclude			yes
Trigg, Lena; Morgan, Brandon; Stringer, Alexander; Schley, Lacey; Hougen, Dean F.	Natural Language Explanation for Autonomous Navigation	10.1109/DASC62030.2024.10749360	https://ieeexplore.ieee.org/abstract/document/10749360	include		exclude	yes
Saad, Mootez; Sharma, Tushar	Naturalness of Attention: Revisiting Attention in Code Language Models	10.1145/3639476.3639774	https://dl.acm.org/doi/abs/10.1145/3639476.3639774?casa_token=ulHsfZysKEYAAAAA:dhWhqQ4YJHJ4x4wMYVukSDNeuO3_iZ1wRl6sU0hTk00l2wFs2FuDEFUf2HmMbOPWZHYWXX8zqI3d	exclude			yes
Ipkovich, Ádám; Czvetkó, Tímea; A Acosta, Lilibeth; Lee, Sanga; Nzimenyera, Innocent; Sebestyén, Viktor; Abonyi, János	Network science and explainable AI-based life cycle management of sustainability models.	10.1371/journal.pone.0300531	https://journals.plos.org/plosone/article?id=10.1371/journal.pone.0300531	exclude			yes
Lamptey, Odartey; Gegov, Alexander; Ouelhadj, Djamila; Hopgood, Adrian; Da Deppo, Serge	Neural Network Based Identification of Terrorist Groups Using Explainable Artificial Intelligence	10.1109/CAI54212.2023.00090	https://ieeexplore.ieee.org/abstract/document/10195143?casa_token=jXWtI1AtjEIAAAAA:iyFZFbfv3a9LmJc5B29d3GHBgpsgNGwSTP2vUqHH83I3LEhHZauq-gsL8Oh8OhlTpFRfFu1xRA	exclude			yes
Sukpanichnant, Purin, Rago, Antonio, Lertvittayakumjorn, Piyawat, Toni, Francesca	Neural QBAFs: Explaining Neural Networks Under LRP-Based Argumentation Frameworks	10.1007/978-3-031-08421-8_30	https://link.springer.com/chapter/10.1007/978-3-031-08421-8_30	include		exclude	yes
Cabitza, Federico; Natali, Chiara; Famiglini, Lorenzo; Campagner, Andrea; Caccavella, Valerio; Gallazzi, Enrico	Never tell me the odds: Investigating pro-hoc explanations in medical decision making.	10.1016/j.artmed.2024.102819	https://www.sciencedirect.com/science/article/pii/S0933365724000617?dgcid=rss_sd_all	include		exclude	yes
Bouchur, Mazen; Reinhardt, Andreas	NILMInspector: An Interactive Tool for Data Visualization and Manipulation in Load Disaggregation	10.1145/3671127.3698794	https://doi.org/10.1145/3671127.3698794	exclude			yes
Jiang, Huimin; Sabetzadeh, Farzad; Lin, Zhijun; Tang, Huajun	Nonlinear Time Series Fuzzy Regression for Developing Explainable Consumer Preferences’ Models Based on Online Comments	10.1109/TFUZZ.2022.3153143	https://ieeexplore.ieee.org/abstract/document/9720205?casa_token=Lvjo2g7MhncAAAAA:xRrxB9zkOChVI4TtKzZzGUl-TD8vICVOxaVv-bSBfNlcA8mwqUDUmSL_wtBED3fYQRRIHYQKPw	exclude			yes
Giulia Vilone, Luca Longo	Notions of explainability and evaluation approaches for explainable artificial intelligence	10.1016/j.inffus.2021.05.009	http://arrow.tudublin.ie/scschcomart/135	exclude	forward backward referencing		yes
Nannini, Luca; Huyskes, Diletta; Panai, Enrico; Pistilli, Giada; Tartaro, Alessio	Nullius in Explanans: an ethical risk assessment for explainable AI	10.1007/s10676-024-09800-7	https://link.springer.com/10.1007/s10676-024-09800-7	exclude			yes
Fan, Xiuyi	On Generating Explainable Plans with Assumption-Based Argumentation	10.1007/978-3-030-03098-8_21	https://link.springer.com/chapter/10.1007/978-3-030-03098-8_21	exclude			yes
Naiseh, Mohammad; Al-Thani, Dena; Jiang, Nan; Ali, Raian	How the different explanation classes impact trust calibration: The case of clinical decision support systems	https://doi.org/10.1016/j.ijhcs.2022.102941	https://www.sciencedirect.com/science/article/pii/S1071581922001616	include		include		yes	healthcare (dss)	tabular data	Local Feature importance	Counterfactual	domain experts	41																													min *+
Naiseh, Mohammad; Al-Thani, Dena; Jiang, Nan; Ali, Raian	How the different explanation classes impact trust calibration: The case of clinical decision support systems	https://doi.org/10.1016/j.ijhcs.2022.102941	https://www.sciencedirect.com/science/article/pii/S1071581922001616	include		include		yes	healthcare (dss)	tabular data	no explanation	Counterfactual	domain experts	41		min *+																											min *+
Naiseh, Mohammad; Al-Thani, Dena; Jiang, Nan; Ali, Raian	How the different explanation classes impact trust calibration: The case of clinical decision support systems	https://doi.org/10.1016/j.ijhcs.2022.102941	https://www.sciencedirect.com/science/article/pii/S1071581922001616	include		include		yes	healthcare (dss)	tabular data	global feature importance	example-based	domain experts	41																													min *+
Kumar, Rathika Suresh, Li, Kelvin Zhenghao, Chia, Si Yin Charlene, Wang, Li Rong, Yip, Vivien Cherng Hui, Ngo, Wei Kiong, Ng, Yih Yng, Fan, Xiuyi	On Identifying Effective Investigations with Feature Finding Using Explainable AI: An Ophthalmology Case Study	10.1007/978-3-031-66535-6_34	https://link.springer.com/chapter/10.1007/978-3-031-66535-6_34	exclude			yes
Bertrand, Astrid; Viard, Tiphaine; Belloum, Rafik; Eagan, James R.; Maxwell, Winston	On Selective, Mutable and Dialogic XAI: a Review of What Users Say about Different Types of Interactive Explanations	10.1145/3544548.3581314	https://doi.org/10.1145/3544548.3581314	exclude	review, forward backward referencing		yes
Darwiche, Adnan, Hirth, Auguste	On the (Complete) Reasons Behind Decisions	10.1007/s10849-022-09377-8	https://link.springer.com/article/10.1007/s10849-022-09377-8	exclude			yes
Lomazzi, L.; Fabiano, S.; Parziale, M.; Giglio, M.; Cadini, F.	On the explainability of convolutional neural networks processing ultrasonic guided waves for damage diagnosis	https://doi.org/10.1016/j.ymssp.2022.109642	https://www.sciencedirect.com/science/article/pii/S0888327022007282	exclude			yes
Naiseh, Mohammad; Al-Thani, Dena; Jiang, Nan; Ali, Raian	How the different explanation classes impact trust calibration: The case of clinical decision support systems	https://doi.org/10.1016/j.ijhcs.2022.102941	https://www.sciencedirect.com/science/article/pii/S1071581922001616	include		include		yes	healthcare (dss)	tabular data	Local Feature importance	example-based	domain experts	41																													min *+
Flores-Araiza, Daniel; Villegas-Jimenez, Armando; Lopez-Tiro, Francisco; Gonzalez-Mendoza, Miguel; Rodríguez-Guéant, Rosa-Maria; Hubert, Jacques; Ochoa-Ruiz, Gilberto; Daul, Christian	On the Link Between Model Performance and Causal Scoring of Medical Image Explanations	10.1109/CBMS61543.2024.00009	https://ieeexplore.ieee.org/abstract/document/10601104?casa_token=kFMa6YWIVFgAAAAA:wtrrXdehkmkphVbh40_fx58p7mLnJMsURTxZr9TYW-095DfHB3WbkWxlMwnPSZXlXXQN7ghtAg	exclude			yes
Potie, Nicolas; Giannoukakos, Stavros; Hackenberg, Michael; Fernandez, Alberto	On the Need of Interpretability for Biomedical Applications: Using Fuzzy Models for Lung Cancer Prediction with Liquid Biopsy	10.1109/FUZZ-IEEE.2019.8858976	https://ieeexplore.ieee.org/abstract/document/8858976?casa_token=ZRNkoCXdlJkAAAAA:h9xi7-c-BGuGoyR2pvdGOCEqaRkBaYQq8L-4LnrTFa546i1iOBaZeJitWv8_6sWU6jC4JKsXkg	exclude			yes
Liu, Yue; Tantithamthavorn, Chakkrit; Liu, Yonghui; Li, Li	On the Reliability and Explainability of Language Models for Program Generation	10.1145/3641540	https://doi.org/10.1145/3641540	include		exclude	yes
Moradi, Loghman; Kalantar, Bahareh; Zaryabi, Erfan Hasanpour; Halin, Alfian Abdul; Ueda, Naonori	On the use of XAI for CNN Model Interpretation: A Remote Sensing Case Study	10.1109/CSDE56538.2022.10089337	https://ieeexplore.ieee.org/abstract/document/10089337?casa_token=4DOdyprh81kAAAAA:QHuCbHMYsCZJgMuHgs_w9Tu80B2Fhu13R-fTaanUmYjijLcP6vKErcSZang8pIsdN46RJbvxZQ	exclude	no user study		yes
Kovvuri, Veera Raghava Reddy; Liu, Siyuan; Seisenberger, Monika; Fan, Xiuyi; Müller, Berndt; Fu, Hsuan	On Understanding the Influence of Controllable Factors with a Feature Attribution Algorithm: a Medical Case Study	10.1109/INISTA55318.2022.9894147	https://ieeexplore.ieee.org/abstract/document/9894147?casa_token=_lE9WZ-Jf4YAAAAA:qtEeWgkEYpAm-nRutWgSEIIB9qwfAZU1ksLGMq5Zp6w_0qAFF9P7TcS3cdb0ZhR282gBUB9dpw	include		exclude	yes
Ribeiro, Rita P., Mastelini, Saulo Martiello, Davari, Narjes, Aminian, Ehsan, Veloso, Bruno, Gama, João	Online Anomaly Explanation: A Case Study on Predictive Maintenance	10.1007/978-3-031-23633-4_25	https://link.springer.com/chapter/10.1007/978-3-031-23633-4_25	exclude			yes
Ponomarev, Andrew, Agafonov, Anton	Ontology-Based Explanations of Neural Networks: A User Perspective	10.1007/978-3-031-60606-9_15	https://link.springer.com/chapter/10.1007/978-3-031-60606-9_15	include		exclude	yes
Smirnov, Alexander; Ponomarev, Andrew; Agafonov, Anton	Ontology-Based Neuro-Symbolic AI: Effects on Prediction Quality and Explainability	10.1109/ACCESS.2024.3485185	https://ieeexplore.ieee.org/abstract/document/10731866	include		exclude	yes
He, Gaole; Balayn, Agathe; Buijsman, Stefan; Yang, Jie; Gadiraju, Ujwal	Opening the Analogical Portal to Explainability: Can Analogies Help Laypeople in AI-assisted Decision Making?	10.1613/jair.1.15118	https://doi.org/10.1613/jair.1.15118	exclude			yes
Würfel, Jakob, Papenfuß, Anne, Wies, Matthias	Operationalizing AI Explainability Using Interpretability Cues in the Cockpit: Insights from User-Centered Development of the Intelligent Pilot Advisory System (IPAS)	10.1007/978-3-031-60606-9_17	https://link.springer.com/chapter/10.1007/978-3-031-60606-9_17	include		exclude	yes
Ponnusamy, Sivakumar; Khoje, Mandar	Optimizing Cloud Costs with Machine Learning: Predictive Resource Scaling Strategies	10.1109/ICITIIT61487.2024.10580717	https://ieeexplore.ieee.org/abstract/document/10580717?casa_token=KcIwZnE5vWUAAAAA:VFN-XKARP640GEaJ9QVy_6BT0XO_NSTCbmeKdfz2z5fDQOAafAR2Rrt-az-roDFS7765T68r3Kk	exclude			yes
Naiseh, Mohammad; Al-Thani, Dena; Jiang, Nan; Ali, Raian	How the different explanation classes impact trust calibration: The case of clinical decision support systems	https://doi.org/10.1016/j.ijhcs.2022.102941	https://www.sciencedirect.com/science/article/pii/S1071581922001616	include		include		yes	healthcare (dss)	tabular data	no explanation	example-based	domain experts	41		min *+																											min *+
Hoque, Md Naimul; Mueller, Klaus	Outcome-Explorer: A Causality Guided Interactive Visual Interface for Interpretable Algorithmic Decision Making	10.1109/TVCG.2021.3102051	https://ieeexplore.ieee.org/abstract/document/9507307?casa_token=kVHRhkDqyQIAAAAA:RNX3Q5FRUNv0_icpZoYwPn9SgqQzTjEV0X4S4t83ropFA1MQLtRAE5DYCz_RbENc4teuZmrPqQ	include		exclude	yes		house price prediction AND Healthcare	tabular data	SHAP	causal DAG module of Outcome-Explorer	lay users
Guo, Weisi	Partially Explainable Big Data Driven Deep Reinforcement Learning for Green 5G UAV	10.1109/ICC40277.2020.9149151	https://ieeexplore.ieee.org/abstract/document/9149151?casa_token=vbdn5z5c1V0AAAAA:lNXrdfwWyJK8V1Xl60seBGCf8srPYusNJnHTSaIwHnOEt-tI9Pc4V9po48x7lDVVxezr-NLzFg	exclude			yes
Gatta, Valerio La; Moscato, Vincenzo; Postiglione, Marco; Sperlì, Giancarlo	PASTLE: Pivot-aided space transformation for local explanations	https://doi.org/10.1016/j.patrec.2021.05.018	https://www.sciencedirect.com/science/article/pii/S0167865521002014	include		exclude	yes
Pourvali, Mohsen, Jin, Yucheng, Sheng, Chen, Meng, Yao, Wang, Lei, Gorkovenko, Masha, Hu, Changjian	Path-Based Visual Explanation	10.1007/978-3-030-60457-8_37	https://link.springer.com/chapter/10.1007/978-3-030-60457-8_37	include		exclude	yes
Amiri, Shideh Shams; Mottahedi, Sam; Lee, Earl Rusty; Hoque, Simi	Peeking inside the black-box: Explainable machine learning applied to household transportation energy consumption	https://doi.org/10.1016/j.compenvurbsys.2021.101647	https://www.sciencedirect.com/science/article/pii/S0198971521000545	exclude			yes
Kouki, Pigi; Schaffer, James; PuJara, Jay; O'Donovan, John; Getoor, Lise	Personalized explanations for hybrid recommender systems	10.1145/3301275.3302306	https://doi.org/10.1145/3301275.3302306	exclude	newer version of this paper included		yes
Cardellicchio, Angelo; Ruggieri, Sergio; Nettis, Andrea; Renò, Vito; Uva, Giuseppina	Physical interpretation of machine learning-based recognition of defects for the risk management of existing bridge heritage	https://doi.org/10.1016/j.engfailanal.2023.107237	https://www.sciencedirect.com/science/article/pii/S1350630723001917	exclude			yes
Wang, Lu; Chignell, Mark; Zhang, Yilun; Pinto, Andrew; Razak, Fahad; Sheehan, Kathleen; Verma, Amol	Physician Experience Design (PXD): More Usable Machine Learning Prediction for Clinical Decision Making.		https://pmc.ncbi.nlm.nih.gov/articles/PMC9285165/	include		exclude	yes
Chakraborti, Tathagata; Sreedharan, Sarath; Grover, Sachin; Kambhampati, Subbarao	Plan Explanations as Model Reconciliation – An Empirical Study	10.1109/HRI.2019.8673193	https://ieeexplore.ieee.org/abstract/document/8673193?casa_token=pNW9LA5ZmhYAAAAA:BdQXeOmnFhI00t0xLhp_gDTtj-RgVSOKcTB6TjQhew-jDmiQeFLcqMdl8-u63KQ8ScEIkUvTVg	include		exclude	yes
Guyomard, Victor, Fessant, Françoise, Bouadi, Tassadit, Guyet, Thomas	Post-hoc Counterfactual Generation with Supervised Autoencoder	10.1007/978-3-030-93736-2_10	https://link.springer.com/chapter/10.1007/978-3-030-93736-2_10	include		exclude	yes
Jeong, Dayoung; Han, Kyungsik	PRECYSE: Predicting Cybersickness using Transformer for Multimodal Time-Series Sensor Data	10.1145/3659594	https://doi.org/10.1145/3659594	include		exclude	yes
Naiseh, Mohammad; Al-Thani, Dena; Jiang, Nan; Ali, Raian	How the different explanation classes impact trust calibration: The case of clinical decision support systems	https://doi.org/10.1016/j.ijhcs.2022.102941	https://www.sciencedirect.com/science/article/pii/S1071581922001616	include		include		yes	healthcare (dss)	tabular data	no explanation	global feature importance	domain experts	41		min *+
Wattanakriengkrai, Supatsara; Thongtanunam, Patanamon; Tantithamthavorn, Chakkrit; Hata, Hideaki; Matsumoto, Kenichi	Predicting Defective Lines Using a Model-Agnostic Technique	10.1109/TSE.2020.3023177	https://ieeexplore.ieee.org/abstract/document/9193975	exclude			yes
Santana, Vagner Figueredo de; Fucs, Ana; Segura, Vinícius; Moraes, Daniel Brugnaro de; Cerqueira, Renato	Predicting the need for XAI from high-granularity interaction data	https://doi.org/10.1016/j.ijhcs.2023.103029	https://www.sciencedirect.com/science/article/pii/S1071581923000356	exclude			yes
Kola, Ilir, Tielman, Myrthe L., Jonker, Catholijn M., Riemsdijk, M. Birna	Predicting the Priority of Social Situations for Personal Assistant Agents	10.1007/978-3-030-69322-0_15	https://link.springer.com/chapter/10.1007/978-3-030-69322-0_15	include		exclude	yes
Pyo, Seok-Kyu, Lee, Dong-Hee, Hur, Sung-Jun, Lee, Sang-Hyeon, Lim, Sung-Jun, Lee, Jong-Eun, Moon, Hong-Kil	Prediction of spring steel wire rod hardness based on wire rod rolling process data: a case study	10.1007/s00170-024-13740-3	https://link.springer.com/article/10.1007/s00170-024-13740-3	exclude			yes
Hajgató, Gergely; Wéber, Richárd; Szilágyi, Botond; Tóthpál, Balázs; Gyires-Tóth, Bálint; Hős, Csaba	PredMaX: Predictive maintenance with explainable deep convolutional autoencoders	https://doi.org/10.1016/j.aei.2022.101778	https://www.sciencedirect.com/science/article/pii/S1474034622002361	exclude			yes
Hanselle, Jonas, Fürnkranz, Johannes, Hüllermeier, Eyke	Probabilistic Scoring Lists for Interpretable Machine Learning	10.1007/978-3-031-45275-8_13	https://link.springer.com/chapter/10.1007/978-3-031-45275-8_13	exclude			yes
Yoon, Jihyeun; Kim, Kyungyul; Jang, Jongseong	Propagated Perturbation of Adversarial Attack for well-known CNNs: Empirical Study and its Explanation	10.1109/ICCVW.2019.00520	https://ieeexplore.ieee.org/abstract/document/9022421?casa_token=9_Oa1ezoNdUAAAAA:c77j9IFqt1dT6-ZkBXQPHnwVUI9WpcK4vn69yZsuBkFtiCVG23yQH_nRodJvEDTTOsEwnQaAVw	exclude			yes
Polato, Mirko; Aiolli, Fabio	Propositional Kernels.	10.3390/e23081020	https://www.mdpi.com/1099-4300/23/8/1020	exclude			yes
Naiseh, Mohammad; Al-Thani, Dena; Jiang, Nan; Ali, Raian	How the different explanation classes impact trust calibration: The case of clinical decision support systems	https://doi.org/10.1016/j.ijhcs.2022.102941	https://www.sciencedirect.com/science/article/pii/S1071581922001616	include		include		yes	healthcare (dss)	tabular data	no explanation	Local Feature importance	domain experts	41		min *+
Naiseh, Mohammad; Al-Thani, Dena; Jiang, Nan; Ali, Raian	How the different explanation classes impact trust calibration: The case of clinical decision support systems	https://doi.org/10.1016/j.ijhcs.2022.102941	https://www.sciencedirect.com/science/article/pii/S1071581922001616	include		include	yes	yes	healthcare (dss)	tabular data	example-based	Counterfactual	domain experts	41
Nourani, Mahsan; Roy, Chiradeep; Block, Jeremy E.; Honeycutt, Donald R.; Rahman, Tahrima; Ragan, Eric D.; Gogate, Vibhav	On the Importance of User Backgrounds and Impressions: Lessons Learned from Interactive AI Applications	10.1145/3531066	https://doi.org/10.1145/3531066	include		include	yes	yes	activity detection in videos	video data	no explanation	video segments, concept and combinations explanations	lay users	110					*+
Mokhtarzadeh, Mahdi; Rodríguez-Echeverría, Jorge; Zeren, Zafer; Noten, Johan Van; Gautama, Sidharta	Pure Data-Driven Machine Learning Challenges for pFMEA: A Case Study	https://doi.org/10.1016/j.ifacol.2024.09.225	https://www.sciencedirect.com/science/article/pii/S2405896324016537	exclude			yes
Pornprasit, Chanathip; Tantithamthavorn, Chakkrit; Jiarpakdee, Jirayus; Fu, Michael; Thongtanunam, Patanamon	PyExplainer: explaining the predictions of just-in-time defect models	10.1109/ASE51524.2021.9678763	https://doi.org/10.1109/ASE51524.2021.9678763	exclude			yes
Mehdiyev, Nijat, Majlatow, Maxim, Fettke, Peter	Quantifying and explaining machine learning uncertainty in predictive process monitoring: an operations research perspective	10.1007/s10479-024-05943-4	https://link.springer.com/article/10.1007/s10479-024-05943-4	include		exclude	yes
Zhang, Qi; Ma, Zhenliang; Wu, Yuanyuan; Liu, Yang; Qu, Xiaobo	Quantifying variable contributions to bus operation delays considering causal relationships	https://doi.org/10.1016/j.tre.2024.103881	https://www.sciencedirect.com/science/article/pii/S1366554524004721	include		exclude	yes
Knof, Helene, Boerger, Michell, Tcholtchev, Nikolay	Quantitative Evaluation of xAI Methods for Multivariate Time Series - A Case Study for a CNN-Based MI Detection Model	10.1007/978-3-031-63803-9_9	https://link.springer.com/chapter/10.1007/978-3-031-63803-9_9	exclude			yes
Prinzi, Francesco; Militello, Carmelo; Zarcaro, Calogero; Bartolotta, Tommaso Vincenzo; Gaglio, Salvatore; Vitabile, Salvatore	Rad4XCNN: A new agnostic method for post-hoc global explanation of CNN-derived features by means of Radiomics	https://doi.org/10.1016/j.cmpb.2024.108576	https://www.sciencedirect.com/science/article/pii/S0169260724005698	exclude			yes
Utama, Christian; Meske, Christian; Schneider, Johannes; Ulbrich, Carolin	Reactive power control in photovoltaic systems through (explainable) artificial intelligence	https://doi.org/10.1016/j.apenergy.2022.120004	https://www.sciencedirect.com/science/article/pii/S0306261922012612	exclude			yes
Anaguchi, Fumikatsu; Chakraborty, Sudesna; Morita, Takeshi; Egami, Shusaku; Ugai, Takanori; Fukuda, Ken	Reasoning and Justification System for Domestic Hazardous Behaviors Based on Knowledge Graph of Daily Activities and Retrieval-Augmented Generation	10.1109/CANDAR64496.2024.00010	https://ieeexplore.ieee.org/abstract/document/10818303	exclude			yes
Fu, Cheng; Zhou, Zhiyong; Xin, Yanan; Weibel, Robert	Reasoning cartographic knowledge in deep learning-based map generalization with explainable AI.	10.1080/13658816.2024.2369535	https://www.tandfonline.com/doi/full/10.1080/13658816.2024.2369535#abstract	include		exclude	yes
England, Matthew	Recent Developments in Real Quantifier Elimination and Cylindrical Algebraic Decomposition (Extended Abstract of Invited Talk)	10.1007/978-3-031-69070-9_1	https://link.springer.com/chapter/10.1007/978-3-031-69070-9_1	exclude			yes
Jeon, Minsu; Kim, Taewoo; Kim, Seonghwan; Lee, Changha; Youn, Chan-Hyun	Recursive Visual Explanations Mediation Scheme Based on DropAttention Model With Multiple Episodes Pool	10.1109/ACCESS.2023.3235332	https://ieeexplore.ieee.org/abstract/document/10012347	exclude			yes
Nwafor, Obumneme; Nwafor, Chioma; Aboushady, Ahmed; Solyman, Ahmed	Reducing non-technical losses in electricity distribution networks: Leveraging explainable AI and three lines of defence model to manage operational staff-related factors	https://doi.org/10.1016/j.prime.2024.100748	https://www.sciencedirect.com/science/article/pii/S2772671124003280	exclude			yes
Katsikopoulos, Konstantinos V.; Şimşek, Özgür; Buckmann, Marcus; Gigerenzer, Gerd	Reply to commentaries on “Transparent modelling of influenza incidence”: Recency heuristics and psychological AI	https://doi.org/10.1016/j.ijforecast.2021.10.011	https://www.sciencedirect.com/science/article/pii/S0169207021001746	exclude			yes
Daudt, Fábio; Cinalli, Daniel; Garcia, Ana Cristina B.	Research on Explainable Artificial Intelligence Techniques: An User Perspective	10.1109/CSCWD49262.2021.9437820	https://ieeexplore.ieee.org/abstract/document/9437820	include		exclude	yes
Mao, Dayou; Chen, Yuhao; Wu, Yifan; Gilles, Maximilian; Wong, Alexander	Rethinking Resource Competition in Multi-Task Learning: From Shared Parameters to Shared Representation	10.1109/ACCESS.2024.3429281	https://ieeexplore.ieee.org/abstract/document/10599476	exclude			yes
Chissano, Mauro Peter Henrique; Minnery, John	Roads, rates and development: Urban roads and growth in Xai-Xai, Mozambique	https://doi.org/10.1016/j.habitatint.2013.10.007	https://www.sciencedirect.com/science/article/pii/S0197397513001045	exclude			yes
Nguyen, Thu Trang; Le Nguyen, Thach; Ifrim, Georgiana	Robust explainer recommendation for time series classification.	10.1007/s10618-024-01045-8	https://link.springer.com/article/10.1007/s10618-024-01045-8	exclude	quantitative evaluation framework for "informativeness" of explanations		yes
Farhadloo, Majid; Molnar, Carl; Luo, Gaoxiang; Li, Yan; Shekhar, Shashi; Maus, Rachel L.; Markovic, Svetomir; Leontovich, Alexey; Moore, Raymond	SAMCNet: Towards a Spatially Explainable AI Approach for Classifying MxIF Oncology Data	10.1145/3534678.3539168	https://doi.org/10.1145/3534678.3539168	include		exclude	yes
Maitra, Sarit; Mishra, Vivek; Verma, Pratima; Chopra, Manav; Nath, Priyanka	Sampling - Variational Auto Encoder - Ensemble: In the Quest of Explainable Artificial Intelligence	10.1109/IEIT59852.2023.10335522	https://ieeexplore.ieee.org/abstract/document/10335522?casa_token=KfHN2vtqEGoAAAAA:yJjPlHgGANNViqMaTH8PXLZuj71xeVqGdhku4u4BMez4gXy88RkGs2ugZG60wauL7D3fGsNLyBM	exclude			yes
El-Zanfaly, Dina; Huang, Yiwei; Dong, Yanwen	Sand-in-the-loop: Investigating embodied co-creation for shared understandings of generative AI	10.1145/3563703.3596652	https://doi.org/10.1145/3563703.3596652	include		exclude	yes
Groß, André; Singh, Amit; Banh, Ngoc Chi; Richter, Birte; Scharlau, Ingrid; Rohlfing, Katharina J.; Wrede, Britta	Scaffolding the human partner by contrastive guidance in an explanatory human-robot dialogue.	10.3389/frobt.2023.1236184	https://www.frontiersin.org/journals/robotics-and-ai/articles/10.3389/frobt.2023.1236184/full	exclude			yes
Burgueño, Antonio Manuel, Aldana-Martín, José F., Vázquez-Pendón, María, Barba-González, Cristóbal, Jiménez Gómez, Yaiza, García Millán, Virginia, Navas-Delgado, Ismael	Scalable approach for high-resolution land cover: a case study in the Mediterranean Basin	10.1186/s40537-023-00770-z	https://link.springer.com/article/10.1186/s40537-023-00770-z	exclude			yes
Leirmo, Torbjørn Langedahl, Larsen, Mats, Mogos, Maria Flavia	Scheduling for Flexible Production: A Case Study of Production Leveling Under Volume Constraints	10.1007/978-3-031-38165-2_20	https://link.springer.com/chapter/10.1007/978-3-031-38165-2_20	exclude			yes
Khalasi, Darshi, Bathwar, Devang, Bhatia, Jitendra, Kumhar, Malaram, Thumar, Vinodray	Secure and Explainable Artificial Intelligence (XAI) in Cloud Ecosystems: Challenges and Opportunities	10.1007/978-981-99-4932-8_51	https://link.springer.com/chapter/10.1007/978-981-99-4932-8_51	exclude			yes
Losch, Max, Fritz, Mario, Schiele, Bernt	Semantic Bottlenecks: Quantifying and Improving Inspectability of Deep Representations	10.1007/s11263-021-01498-0	https://link.springer.com/article/10.1007/s11263-021-01498-0	exclude			yes
Overney, Cassandra; Saldías, Belén; Dimitrakopoulou, Dimitra; Roy, Deb	SenseMate: An Accessible and Beginner-Friendly Human-AI Platform for Qualitative Data Analysis	10.1145/3640543.3645194	https://doi.org/10.1145/3640543.3645194	include		exclude	yes
Hermansa, Marek; Kozielski, Michał; Michalak, Marcin; Szczyrba, Krzysztof; Wróbel, Łukasz; Sikora, Marek	Sensor-Based Predictive Maintenance with Reduction of False Alarms-A Case Study in Heavy Industry.	10.3390/s22010226	https://www.mdpi.com/1424-8220/22/1/226	exclude			yes
Mauro, Noemi, Hu, Zhongli Filippo, Ardissono, Liliana	Service-Oriented Justification of Recommender System Suggestions	10.1007/978-3-030-85613-7_23	https://link.springer.com/chapter/10.1007/978-3-030-85613-7_23	include		exclude	yes
Yang, Chen; Wang, Chen; Wu, Bin; Zhao, Feng; Fan, Jian-sheng; Zhou, Lu	Settlement estimation during foundation excavation using pattern analysis and explainable AI modeling	https://doi.org/10.1016/j.autcon.2024.105651	https://www.sciencedirect.com/science/article/pii/S092658052400387X	exclude			yes
Cohen, Joseph; Huan, Xun; Ni, Jun	Shapley-based explainable AI for clustering applications in fault diagnosis and prognosis	10.1007/s10845-024-02468-2	https://link.springer.com/10.1007/s10845-024-02468-2	exclude			yes
Swain, Ritwik; Kaye, Sherrie-Anne; Rakotonirainy, Andry	Shared intention and shared awareness for conditional automated driving: An online, randomized video experiment	https://doi.org/10.1080/15389588.2024.2421215	https://www.sciencedirect.com/science/article/pii/S1538958824001772	include		exclude	yes
Sun, Jiamou; Xing, Zhenchang; Lu, Qinghua; Xu, Xiwei; Zhu, Liming; Hoang, Thong; Zhao, Dehai	Silent Vulnerable Dependency Alert Prediction with Vulnerability Key Aspect Explanation	10.1109/ICSE48619.2023.00089	https://doi.org/10.1109/ICSE48619.2023.00089	include		exclude	yes
Valero-Leal, Enrique, Campos, Manuel, Juarez, Jose M.	Simple Explanations to Summarise Subgroup Discovery Outcomes: A Case Study Concerning Patient Phenotyping	10.1007/978-3-031-23618-1_29	https://link.springer.com/chapter/10.1007/978-3-031-23618-1_29	include		exclude	yes
Henriksen, Anne; Enni, Simon; Bechmann, Anja	Situated Accountability: Ethical Principles, Certification Standards, and Explanation Methods in Applied AI	10.1145/3461702.3462564	https://doi.org/10.1145/3461702.3462564	include		exclude	yes
Madushanka, Ayesh; Laird, Eli; Clark, Corey; Kraka, Elfi	SmartCADD: AI-QM Empowered Drug Discovery Platform with Explainability.	10.1021/acs.jcim.4c00720	https://pubs.acs.org/doi/full/10.1021/acs.jcim.4c00720?casa_token=ZFQiYkZU4jQAAAAA%3Ar8LRUksu58MxNWiznVKrdP525N4SPn8FLLOmgz3Q8ClQvIHDvBVLRzEPWFdnqnHyjQZl1faOCkdGYyM	exclude			yes
Hidouri, Amel, Arbaoui, Slimane, Samet, Ahmed, Ayadi, Ali, Mesbahi, Tedjani, Boné, Romuald, Beuvron, François de Bertrand	SOCXAI: Leveraging CNN and SHAP Analysis for Battery SOC Estimation and Anomaly Detection	10.1007/978-3-031-63783-4_14	https://link.springer.com/chapter/10.1007/978-3-031-63783-4_14	include		exclude	yes
Tziolas, Nikolaos; Tsakiridis, Nikolaos; Heiden, Uta; Wesemael, Bas van	Soil organic carbon mapping utilizing convolutional neural networks and Earth observation data, a case study in Bavaria state Germany	https://doi.org/10.1016/j.geoderma.2024.116867	https://www.sciencedirect.com/science/article/pii/S001670612400096X	exclude			yes
Ferguson, Sharon A; Aoyagui, Paula Akemi; Kuzminykh, Anastasia	Something Borrowed: Exploring the Influence of AI-Generated Explanation Text on the Composition of Human Explanations	10.1145/3544549.3585727	https://doi.org/10.1145/3544549.3585727	include		exclude	yes
Rajapaksha, Dilini; Tantithamthavorn, Chakkrit; Jiarpakdee, Jirayus; Bergmeir, Christoph; Grundy, John; Buntine, Wray	SQAPlanner: Generating Data-Informed Software Quality Improvement Plans	10.1109/TSE.2021.3070559	https://ieeexplore.ieee.org/abstract/document/9394771?casa_token=S9GZ6vzNWvcAAAAA:0f_qGVBWYL_dVV-a9qg0kXVgfwrDMKX_4mDBjeZDhtq_fe7ua_LNaoPLw1yE6J5USeM-2xVbyQ	include		exclude	yes
Rožanec, Jože M., Zajec, Patrik, Kenda, Klemen, Novalija, Inna, Fortuna, Blaž, Mladenić, Dunja, Veliou, Entso, Papamartzivanos, Dimitrios, Giannetsos, Thanassis, Menesidou, Sofia Anna, Alonso, Rubén, Cauli, Nino, Recupero, Diego Reforgiato, Kyriazis, Dimosthenis, Sofianidis, Georgios, Theodoropoulos, Spyros, Soldatos, John	STARdom: An Architecture for Trusted and Secure Human-Centered Manufacturing Systems	10.1007/978-3-030-85910-7_21	https://link.springer.com/chapter/10.1007/978-3-030-85910-7_21	exclude			yes
Wu, Wenjun, Zhao, Yuechen, Wang, Yue, Wang, Xiuli	Stock Price Forecasting and Rule Extraction Based on L1-Orthogonal Regularized GRU Decision Tree Interpretation Model	10.1007/978-981-15-7984-4_23	https://link.springer.com/chapter/10.1007/978-981-15-7984-4_23	exclude			yes
Panigutti, Cecilia; Beretta, Andrea; Fadda, Daniele; Giannotti, Fosca; Pedreschi, Dino; Perotti, Alan; Rinzivillo, Salvatore	Co-design of Human-centered, Explainable AI for Clinical Decision Support	10.1145/3587271	https://doi.org/10.1145/3587271	include		include	yes	yes	healthcare DSS	time series and tabular	no explanation	Dr XAI	domain experts	45	**+
Panigutti, Cecilia; Beretta, Andrea; Giannotti, Fosca; Pedreschi, Dino	Understanding the impact of explanations on advice-taking: a user study for AI-based clinical Decision Support Systems	10.1145/3491102.3502104	https://doi.org/10.1145/3491102.3502104	include		include	yes	yes	healthcare	tabular/ time series data	no explanation	ontology-based decision tree	domain experts	28		**+
Polley, Sayantan; Koparde, Rashmi Raju; Gowri, Akshaya Bindu; Perera, Maneendra; Nuernberger, Andreas	Towards Trustworthiness in the Context of Explainable Search	10.1145/3404835.3462799	https://doi.org/10.1145/3404835.3462799	include		include	yes	yes	search engines	tabular/text	bag of words	simfic 2.0 (global+local(	lay users	24										*+
Qu, Jiaming; Arguello, Jaime; Wang, Yue	Why is "Problems" Predictive of Positive Sentiment? A Case Study of Explaining Unintuitive Features in Sentiment Classification	10.1145/3630106.3658547	https://doi.org/10.1145/3630106.3658547	include		include	yes	yes	Product review analysis	mixed data with natural language and tabular data	no explanation	example-based	lay users	300										min *+
Qu, Jiaming; Arguello, Jaime; Wang, Yue	Why is "Problems" Predictive of Positive Sentiment? A Case Study of Explaining Unintuitive Features in Sentiment Classification	10.1145/3630106.3658547	https://doi.org/10.1145/3630106.3658547	include		include		yes	Product review analysis	mixed data with natural language and tabular data	no explanation	data distribution	lay users	300													min *+
Qu, Jiaming; Arguello, Jaime; Wang, Yue	Why is "Problems" Predictive of Positive Sentiment? A Case Study of Explaining Unintuitive Features in Sentiment Classification	10.1145/3630106.3658547	https://doi.org/10.1145/3630106.3658547	include		include		yes	Product review analysis	mixed data with natural language and tabular data	no explanation	example + distribution	lay users	300				min *+						min *+			min *+														min *+
Qu, Jiaming; Arguello, Jaime; Wang, Yue	Why is "Problems" Predictive of Positive Sentiment? A Case Study of Explaining Unintuitive Features in Sentiment Classification	10.1145/3630106.3658547	https://doi.org/10.1145/3630106.3658547	include		include		yes	Product review analysis	mixed data with natural language and tabular data	no explanation	pattern + distribution	lay users	300				min *+						min *+			min *+														min *+
Qu, Jiaming; Arguello, Jaime; Wang, Yue	Why is "Problems" Predictive of Positive Sentiment? A Case Study of Explaining Unintuitive Features in Sentiment Classification	10.1145/3630106.3658547	https://doi.org/10.1145/3630106.3658547	include		include		yes	Product review analysis	mixed data with natural language and tabular data	no explanation	pattern-based	lay users	300				min *+						min *+
Radensky, Marissa; Downey, Doug; Lo, Kyle; Popovic, Zoran; Weld, Daniel S	Exploring the Role of Local and Global Explanations in Recommender Systems	10.1145/3491101.3519795	https://doi.org/10.1145/3491101.3519795	include		include	yes	yes	search engines	Natural Language	global feature importance	global and local feature importance	domain experts	30
Righetti, Guendalina, Porello, Daniele, Confalonieri, Roberto	Evaluating the Interpretability of Threshold Operators	10.1007/978-3-031-17105-5_10	https://link.springer.com/chapter/10.1007/978-3-031-17105-5_10	include		include	yes	yes	general (logical expressions)	none	DNF	Tooth expression	lay users	58
Schrills, Tim, Franke, Thomas	Color for Characters - Effects of Visual Explanations of AI on Trust and Observability	10.1007/978-3-030-50334-5_8	https://link.springer.com/chapter/10.1007/978-3-030-50334-5_8	include		include		yes	number recognition	image data	feature importance	FI comparison actual class to next likely class	lay users	83										***+
Schrills, Tim, Franke, Thomas	Color for Characters - Effects of Visual Explanations of AI on Trust and Observability	10.1007/978-3-030-50334-5_8	https://link.springer.com/chapter/10.1007/978-3-030-50334-5_8	include		include		yes	number recognition	image data	no explanation	FI comparison actual class to next likely class	lay users	83																															**+
Kaur, Mandeep; Lavisha; Salgotra, Priyanka; Laxmi, Vijay; Suchitra; Kaur, Kamaljeet	Strategizing Financial Management in the Age of AI for Enhanced Decision-Making and Predictive Analysis	10.1109/TQCEBT59414.2024.10545265	https://ieeexplore.ieee.org/abstract/document/10545265?casa_token=fKvR0zSml5IAAAAA:XG70D3UoO_80avuG0mYngtNu_uBjMk4N0-mXjfSZdumGaVzEkmkD1-01C6gcuhojZYIAwN8LwQ	exclude			yes
Szulc, Natalia A.; Mackiewicz, Zuzanna; Bujnicki, Janusz M.; Stefaniak, Filip	Structural interaction fingerprints and machine learning for predicting and explaining binding of small molecule ligands to RNA.	10.1093/bib/bbad187	https://academic.oup.com/bib/article/24/4/bbad187/7171416?login=false	exclude			yes
Schrills, Tim, Franke, Thomas	Color for Characters - Effects of Visual Explanations of AI on Trust and Observability	10.1007/978-3-030-50334-5_8	https://link.springer.com/chapter/10.1007/978-3-030-50334-5_8	include		include	yes	yes	number recognition	image data	no explanation	feature importance	lay users	83										**-																					*+
Schulze-Weddige, Sophia, Zylowski, Thorsten	User Study on the Effects Explainable AI Visualizations on Non-experts	10.1007/978-3-030-95531-1_31	https://link.springer.com/chapter/10.1007/978-3-030-95531-1_31	include		include	yes	yes	predictive sales	tabular data	SHAP decision plot	SHAP bar plot	lay users	15																							**+
Schulze-Weddige, Sophia, Zylowski, Thorsten	User Study on the Effects Explainable AI Visualizations on Non-experts	10.1007/978-3-030-95531-1_31	https://link.springer.com/chapter/10.1007/978-3-030-95531-1_31	include		include		yes	predictive sales	tabular data	LIME	counterfactual	lay users	15																							**+
Schulze-Weddige, Sophia, Zylowski, Thorsten	User Study on the Effects Explainable AI Visualizations on Non-experts	10.1007/978-3-030-95531-1_31	https://link.springer.com/chapter/10.1007/978-3-030-95531-1_31	include		include		yes	predictive sales	tabular data	LIME	SHAP bar plot	lay users	15																							***+
Schulze-Weddige, Sophia, Zylowski, Thorsten	User Study on the Effects Explainable AI Visualizations on Non-experts	10.1007/978-3-030-95531-1_31	https://link.springer.com/chapter/10.1007/978-3-030-95531-1_31	include		include		yes	predictive sales	tabular data	SHAP force plot	SHAP bar plot	lay users	15																							**+
Refoyo, Mario; Luengo, David	Sub-SpaCE: Subsequence-Based Sparse Counterfactual Explanations for Time Series Classification Problems	10.21203/rs.3.rs-3706710/v1	https://link.springer.com/10.1007/978-3-031-63800-8_1	exclude
Refoyo, Mario, Luengo, David	Sub-SpaCE: Subsequence-Based Sparse Counterfactual Explanations for Time Series Classification Problems	10.1007/978-3-031-63800-8_1	https://link.springer.com/chapter/10.1007/978-3-031-63800-8_1	include		exclude	yes
Artelt, André; Gregoriades, Andreas	Supporting organizational decisions on How to improve customer repurchase using multi-instance counterfactual explanations	https://doi.org/10.1016/j.dss.2024.114249	https://www.sciencedirect.com/science/article/pii/S0167923624000824	include		exclude	yes
Tandon, Sara; Wang, Jennifer	Surfacing AI Explainability in Enterprise Product Visual Design to Address User Tech Proficiency Differences	10.1145/3544549.3573867	https://doi.org/10.1145/3544549.3573867	include		exclude	yes
Hoogendoorn, TJalling; Arachchige, Jeewanie Jayasinghe; Bukhsh, Faiza A.	Survey of Explainability within Process Mining: A case study of BPI challenge 2020	10.1109/FIT60620.2023.00018	https://ieeexplore.ieee.org/abstract/document/10410334?casa_token=azBQf2e2tXEAAAAA:ArjDFRC6XN8FRBreKTeGDPNODDsP6ATMjB7ZA9cueZTJn8pfGOYiIyeAAV-3ipLwePJxmCXQEg	exclude			yes
Patil, Tanaya, Arora, Sandhya	Survey of Explainable AI Techniques: A Case Study of Healthcare	10.1007/978-981-99-5652-4_30	https://link.springer.com/chapter/10.1007/978-981-99-5652-4_30	exclude			yes
Muhammad Alfarizi, Lissa Rosdiana Noer	SUSTAINABLE PRACTICES AND GREEN MARKETING IN HEALTHCARE SECTOR: VISUAL TRENDS AND FUTURE INSIGHT	10.7454/jessd.v7i2.1283	http://scholarhub.ui.ac.id/jessd/vol7/iss2/11	exclude			yes
Nguyen, An; Foerstel, Stefan; Kittler, Thomas; Kurzyukov, Andrey; Schwinn, Leo; Zanca, Dario; Hipp, Tobias; Jun, Sun Da; Schrapp, Michael; Rothgang, Eva; Eskofier, Bjoern	System Design for a Data-Driven and Explainable Customer Sentiment Monitor Using IoT and Enterprise Data	10.1109/ACCESS.2021.3106791	https://ieeexplore.ieee.org/abstract/document/9520354	exclude			yes
Wei, Sixiao; Fan, Zhengyang; Chen, Genshe; Blasch, Erik; Chen, Yu; Pham, Khanh	TADAD: Trust AI-based Decentralized Anomaly Detection for Urban Air Mobility Networks at Tactical Edges	10.1109/ICNS60906.2024.10550825	https://ieeexplore.ieee.org/abstract/document/10550825?casa_token=C3FpZYC4OPsAAAAA:8UnAHB32_yeP_w46TokcLR9aiqhuCpw66QcBkPhKGcM1mcJj2FYmyRNAI3-Wo33wXQ4Vb-tdrg	exclude			yes
Gur Ali, Ozden	Targeting resources efficiently and justifiably by combining causal machine learning and theory.	10.3389/frai.2022.1015604	https://www.frontiersin.org/journals/artificial-intelligence/articles/10.3389/frai.2022.1015604/full	exclude			yes
Irarrázaval, María Elisa; Maldonado, Sebastián; Pérez, Juan; Vairetti, Carla	Telecom traffic pumping analytics via explainable data science	https://doi.org/10.1016/j.dss.2021.113559	https://www.sciencedirect.com/science/article/pii/S0167923621000695	exclude			yes
Ng, Sandra; Masarone, Sara; Watson, David; Barnes, Michael R.	The benefits and pitfalls of machine learning for biomarker discovery.	10.1007/s00441-023-03816-z	https://link.springer.com/article/10.1007/s00441-023-03816-z	exclude	review on ml for biomarker discorvery		yes
Akhavan Rahnama, Amir Hossein	The Blame Problem in Evaluating Local Explanations and How to Tackle It	10.1007/978-3-031-50396-2_4	https://link.springer.com/10.1007/978-3-031-50396-2_4	include		exclude	yes
Wójcik, Magdalena	The Contribution of Social Sciences Driven User Studies to the Development of Human-Centered Artificial Intelligence	10.1007/978-3-031-77731-8_27	https://link.springer.com/10.1007/978-3-031-77731-8_27	include	forward backward referencing	exclude	yes
Faulhaber, Anja K.; Ni, Ina; Schmidt, Ludger	The Effect of Explanations on Trust in an Assistance System for Public Transport Users and the Role of the Propensity to Trust	10.1145/3473856.3473886	https://doi.org/10.1145/3473856.3473886	include		exclude	yes		DSS for chosing trains	tabular data	no explanation	global, manually written explanation ("coherent and simple")	lay users	40										*+
Muralidhar, Deepa	The Effect of Progressive Disclosure in the Transparency of Explainable Artificial Intelligence Systems	10.1109/VL/HCC60511.2024.00057	https://ieeexplore.ieee.org/abstract/document/10714541?casa_token=jBRd03FY1ioAAAAA:tR6GvlhaPsk9KCEKjE79ONUmxD1RPcVc4SJKxRr0kEDodiS7SeE0Vw5UzUz90SVxldjse_qnTg	include		exclude	yes
Ferguson, Sharon; Aoyagui, Paula Akemi; Rizvi, Rimsha; Kim, Young-Ho; Kuzminykh, Anastasia	The Explanation That Hits Home: The Characteristics of Verbal Explanations That Affect Human Perception in Subjective Decision-Making	10.1145/3687056	https://doi.org/10.1145/3687056	include		exclude	yes
Sovrano, Francesco; Vitali, Fabio	From Philosophy to Interfaces: an Explanatory Method and a Tool Inspired by Achinstein’s Theory of Explanation	10.1145/3397481.3450655	https://doi.org/10.1145/3397481.3450655	include		include	yes	yes	credit approval	tabular	contrastive explanation (CEM)	CEM + interactive Add-on with textual explanations	lay users	97
Severes, Beatriz; Carreira, Carolina; Vieira, Ana Beatriz; Gomes, Eduardo; Aparício, João Tiago; Pereira, Inês	The Human Side of XAI: Bridging the Gap between AI and Non-expert Audiences	10.1145/3615335.3623062	https://doi.org/10.1145/3615335.3623062	exclude			yes
Morrison, Katelyn; Spitzer, Philipp; Turri, Violet; Feng, Michelle; Kühl, Niklas; Perer, Adam	The Impact of Imperfect XAI on Human-AI Decision-Making	10.1145/3641022	https://doi.org/10.1145/3641022	include		exclude	yes		bird identification	image data	always follow AI	example-based	domain experts	83
Morrison, Katelyn; Spitzer, Philipp; Turri, Violet; Feng, Michelle; Kühl, Niklas; Perer, Adam	The Impact of Imperfect XAI on Human-AI Decision-Making	10.1145/3641022	https://doi.org/10.1145/3641022	include		exclude			bird identification	image data	always follow AI	example-based	domain experts	83
Morrison, Katelyn; Spitzer, Philipp; Turri, Violet; Feng, Michelle; Kühl, Niklas; Perer, Adam	The Impact of Imperfect XAI on Human-AI Decision-Making	10.1145/3641022	https://doi.org/10.1145/3641022	include		exclude			bird identification	image data	always follow AI	text (concept-based)	lay users	53
Morrison, Katelyn; Spitzer, Philipp; Turri, Violet; Feng, Michelle; Kühl, Niklas; Perer, Adam	The Impact of Imperfect XAI on Human-AI Decision-Making	10.1145/3641022	https://doi.org/10.1145/3641022	include		exclude			bird identification	image data	always follow AI	text (concept-based)	lay users	53
Morrison, Katelyn; Spitzer, Philipp; Turri, Violet; Feng, Michelle; Kühl, Niklas; Perer, Adam	The Impact of Imperfect XAI on Human-AI Decision-Making	10.1145/3641022	https://doi.org/10.1145/3641022	include		exclude			bird identification	image data	no AI	example-based	domain experts	83
Morrison, Katelyn; Spitzer, Philipp; Turri, Violet; Feng, Michelle; Kühl, Niklas; Perer, Adam	The Impact of Imperfect XAI on Human-AI Decision-Making	10.1145/3641022	https://doi.org/10.1145/3641022	include		exclude			bird identification	image data	no AI	example-based	domain experts	83
Morrison, Katelyn; Spitzer, Philipp; Turri, Violet; Feng, Michelle; Kühl, Niklas; Perer, Adam	The Impact of Imperfect XAI on Human-AI Decision-Making	10.1145/3641022	https://doi.org/10.1145/3641022	include		exclude			bird identification	image data	no AI	text (concept-based)	lay users	53
Morrison, Katelyn; Spitzer, Philipp; Turri, Violet; Feng, Michelle; Kühl, Niklas; Perer, Adam	The Impact of Imperfect XAI on Human-AI Decision-Making	10.1145/3641022	https://doi.org/10.1145/3641022	include		exclude			bird identification	image data	no AI	text (concept-based)	lay users	53
Fulane, Gefra; Major, Maria; Lorenzoni, Cesaltina; Munguambe, Khatia	The Influence of Institutional Logics and Emotions on the Uptake of Cervical Cancer Screening: A Case Study From Xai-Xai, Mozambique.	10.1177/11786329231224619	https://journals.sagepub.com/doi/full/10.1177/11786329231224619	exclude			yes
Verhagen, Ruben S.; Neerincx, Mark A.; Tielman, Myrthe L.	The influence of interdependence and a transparent or explainable communication style on human-robot teamwork.	10.3389/frobt.2022.993997	https://www.frontiersin.org/journals/robotics-and-ai/articles/10.3389/frobt.2022.993997/full	include		exclude	yes
Bello, Marilyn; Amador, Rosalís; García, María-Matilde; Ser, Javier Del; Mesejo, Pablo; Cordón, Óscar	The level of strength of an explanation: A quantitative evaluation technique for post-hoc XAI methods	https://doi.org/10.1016/j.patcog.2024.111221	https://www.sciencedirect.com/science/article/pii/S0031320324009725	exclude			yes
Mualla, Yazan; Tchappi, Igor; Kampik, Timotheus; Najjar, Amro; Calvaresi, Davide; Abbas-Turki, Abdeljalil; Galland, Stéphane; Nicolle, Christophe	The quest of parsimonious XAI: A human-agent architecture for explanation formulation	https://doi.org/10.1016/j.artint.2021.103573	https://www.sciencedirect.com/science/article/pii/S0004370221001247	include		exclude	yes						lay users	90
Stoll, Elena; Urban, Adam; Ballin, Philipp; Kammer, Dietrich	Can Explainable AI Foster Trust in a Customer Dialogue System?	10.1145/3531073.3534481	https://doi.org/10.1145/3531073.3534481	include		include	yes	yes	customer dialog system	text classification	no explanation	confusion matrix and confidence score	lay users	23 bzw 21
Ferrario, Andrea; Loi, Michele	The Robustness of Counterfactual Explanations Over Time	10.1109/ACCESS.2022.3196917	https://ieeexplore.ieee.org/abstract/document/9851645	exclude			yes
Schmitt, Vera; Villa-Arenas, Luis-Felipe; Feldhus, Nils; Meyer, Joachim; Spang, Robert P.; Möller, Sebastian	The Role of Explainability in Collaborative Human-AI Disinformation Detection	10.1145/3630106.3659031	https://doi.org/10.1145/3630106.3659031	include		exclude		yes	fake news detection	text and tabular data	no explanation	free text (NLP?)	lay users	266										**+	**+															**+
Schmitt, Vera; Villa-Arenas, Luis-Felipe; Feldhus, Nils; Meyer, Joachim; Spang, Robert P.; Möller, Sebastian	The Role of Explainability in Collaborative Human-AI Disinformation Detection	10.1145/3630106.3659031	https://doi.org/10.1145/3630106.3659031	include		exclude	yes	yes	fake news detection	text and tabular data	no explanation	free text (NLP?)	domain experts	18										*+
Schmitt, Vera; Villa-Arenas, Luis-Felipe; Feldhus, Nils; Meyer, Joachim; Spang, Robert P.; Möller, Sebastian	The Role of Explainability in Collaborative Human-AI Disinformation Detection	10.1145/3630106.3659031	https://doi.org/10.1145/3630106.3659031	include		exclude			fake news detection	text and tabular data	no explanation	salient explanations (text highlighting)	domain experts	17										*+
Schmitt, Vera; Villa-Arenas, Luis-Felipe; Feldhus, Nils; Meyer, Joachim; Spang, Robert P.; Möller, Sebastian	The Role of Explainability in Collaborative Human-AI Disinformation Detection	10.1145/3630106.3659031	https://doi.org/10.1145/3630106.3659031	include		exclude			fake news detection	text and tabular data	no explanation	salient explanations (text highlighting)	lay users	274										*+	*+															*+
Almutairi, Taghreed H.; Olatunji, Sunday O.	The utilization of AI in healthcare to predict no-shows for dental appointments: A case study conducted in Saudi Arabia	https://doi.org/10.1016/j.imu.2024.101472	https://www.sciencedirect.com/science/article/pii/S2352914824000285	exclude			yes
Stocco, Andrea; Nunes, Paulo J.; D'Amorim, Marcelo; Tonella, Paolo	ThirdEye: Attention Maps for Safe Autonomous Driving Systems	10.1145/3551349.3556968	https://doi.org/10.1145/3551349.3556968	exclude			yes
Gautam, Srishti; Höhne, Marina M.-C.; Hansen, Stine; Jenssen, Robert; Kampffmeyer, Michael	This looks More Like that: Enhancing Self-Explaining Models by Prototypical Relevance Propagation	https://doi.org/10.1016/j.patcog.2022.109172	https://www.sciencedirect.com/science/article/pii/S0031320322006513	exclude			yes
Chung, Hyunseung; Jo, Sumin; Kwon, Yeonsu; Choi, Edward	Time is Not Enough: Time-Frequency based Explanation for Time-Series Black-Box Models	10.1145/3627673.3679844	https://doi.org/10.1145/3627673.3679844	include		exclude	yes
Bhullar, Gurman; Khullar, Aseem; Kumar, Apoorva; Sharma, Anirudh; Pannu, H. S.; Malhi, Avleen	Time series sentiment analysis (SA) of relief operations using social media (SM) platform for efficient resource management	https://doi.org/10.1016/j.ijdrr.2022.102979	https://www.sciencedirect.com/science/article/pii/S2212420922001984	exclude			yes
Penney, Sean; Dodge, Jonathan; Hilderbrand, Claudia; Anderson, Andrew; Simpson, Logan; Burnett, Margaret	Toward Foraging for Understanding of StarCraft Agents: An Empirical Study	10.1145/3172944.3172946	https://doi.org/10.1145/3172944.3172946	include		exclude	yes
Bui, Tien-Cuong, Li, Wen-Syan	Toward Interpretable Graph Classification via Concept-Focused Structural Correspondence	10.1007/978-981-97-2650-9_2	https://link.springer.com/chapter/10.1007/978-981-97-2650-9_2	include		exclude	yes
Bui, Tien-Cuong; Li, Wen-Syan	Toward Interpretable Graph Neural Networks via Concept Matching Model	10.1109/ICDM58522.2023.00106	https://ieeexplore.ieee.org/abstract/document/10415803?casa_token=bIQS12NAkp4AAAAA:ul-Afp1AZHpjR0yp-pjtEV9uhdKFCwnvw2EisvPq8tepzPWvrUFv_PMLZhgvykPxt5zyw9lCbQ	include		exclude	yes
Conati, Cristina; Barral, Oswald; Putnam, Vanessa; Rieger, Lea	Toward personalized XAI: A case study in intelligent tutoring systems	https://doi.org/10.1016/j.artint.2021.103503	https://www.sciencedirect.com/science/article/pii/S0004370221000540	include		exclude	yes
Bumiller, Anne; Barais, Olivier; Aillery, Nicolas; Le Lan, Gael	Towards a Better Understanding of Impersonation Risks	10.1109/SIN56466.2022.9970540	https://ieeexplore.ieee.org/abstract/document/9970540?casa_token=QRcY6snY_zcAAAAA:YwhAFUj8ipBZZUR_fP3Wledyk4DGl5gWg2O9ZaLgzgMUVknGUOs2vXo-oTWq5glxmoHsnfotIQ	exclude			yes
Oprescu, A. M.; Miró-Amarante, G.; García-Díaz, L.; Rey, V. E.; Chimenea-Toscano, A.; Martínez-Martínez, R.; Romero-Ternero, M. C.	Towards a data collection methodology for Responsible Artificial Intelligence in health: A prospective and qualitative study in pregnancy	https://doi.org/10.1016/j.inffus.2022.03.011	https://www.sciencedirect.com/science/article/pii/S1566253522000355	exclude			yes
Khalid, Zainab; Iqbal, Farkhund; Fung, Benjamin C. M.	Towards a unified XAI-based framework for digital forensic investigations	https://doi.org/10.1016/j.fsidi.2024.301806	https://www.sciencedirect.com/science/article/pii/S2666281724001306	exclude			yes
Blasilli, Graziano; Kerrigan, Daniel; Bertini, Enrico; Santucci, Giuseppe	Towards a Visual Perception-Based Analysis of Clustering Quality Metrics	10.1109/VDS63897.2024.00007	https://ieeevis.b-cdn.net/vis_2024/pdfs/s-vds-1013.pdf	exclude			yes
Wais, Beate, Rinderle-Ma, Stefanie	Towards a Comprehensive Evaluation of Decision Rules and Decision Mining Algorithms Beyond Accuracy	10.1007/978-3-031-61057-8_24	https://link.springer.com/chapter/10.1007/978-3-031-61057-8_24	exclude			yes
Fukuchi, Yosuke; Yamada, Seiji	Towards Adaptive Explanation with Social Robot in Human-XAI Interaction	10.1145/3687272.3690879	https://doi.org/10.1145/3687272.3690879	include		exclude	yes
Zhang, Qiyuan; Hall, Mark; Johansen, Mark; Galetic, Vedran; Grange, Jacques; Quintana-Amate, Santiago; Nottle, Alistair; Jones, Dylan M.; Morgan, Phillip L.	Towards an Integrated Evaluation Framework for XAI: An Experimental Study	https://doi.org/10.1016/j.procs.2022.09.450	https://www.sciencedirect.com/science/article/pii/S1877050922013436	include		exclude	yes
Starkey, Andrew, Ezenkwu, Chinedu Pascal	Towards Autonomous Developmental Artificial Intelligence: Case Study for Explainable AI	10.1007/978-3-031-34107-6_8	https://link.springer.com/chapter/10.1007/978-3-031-34107-6_8	exclude			yes
Xie, Laixin; Ouyang, Yang; Chen, Longfei; Wu, Ziming; Li, Quan	Towards Better Modeling With Missing Data: A Contrastive Learning-Based Visual Analytics Perspective	10.1109/TVCG.2023.3285210	https://ieeexplore.ieee.org/abstract/document/10149378?casa_token=zmcLkMWevTcAAAAA:wDpLXH3PnScrh_Oi3KwUiahgVOVRBFr_mP1TquVBpZv3pBXpttG16yzEMoVkZ8DT6MMt-cT15Q	include		exclude	yes
Dikopoulou, Zoumpolia; Lavasa, Eleni; Perez-Castanos, Sergi; Monzo, David; Moustakidis, Serafeim	Towards Explainable AI Validation in Industry 4.0: A Fuzzy Cognitive Map-based Evaluation Framework for Assessing Business Value	10.1109/ICE/ITMC58018.2023.10332301	https://ieeexplore.ieee.org/abstract/document/10332301?casa_token=GqH_Aj1Hm1UAAAAA:47mP3rpMAcCy4jRBXQ69t5zzTRGIVEu8a3yO6Lcz9c5tXaemjJXDsYQ2A5k_VQjMZzBcdA21dQ	include		exclude	yes
Drapal, Patricia; Prudêncio, Ricardo B. C.; Filho, Telmo M. Silva	Towards explainable evaluation: Explaining predicted performance using local performance regions	https://doi.org/10.1016/j.asoc.2024.112351	https://www.sciencedirect.com/science/article/pii/S1568494624011256	exclude			yes
Flanagan, Brendan; Liang, Changhao; Majumdar, Rwitajit; Ogata, Hiroaki	Towards Explainable Group Formation by Knowledge Map based Genetic Algorithm	10.1109/ICALT52272.2021.00119	https://ieeexplore.ieee.org/abstract/document/9499897?casa_token=cNo3tnwKvxkAAAAA:8lv9VebV8RfzbMv8xtOEvKywbWTpSBBFgYmYDZCSDU-EwUGcTt72JCmlxoLHjy5CfVIbGS5TTw	exclude			yes
Misitano, Giovanni, Afsar, Bekir, Lárraga, Giomara, Miettinen, Kaisa	Towards explainable interactive multiobjective optimization: R-XIMO	10.1007/s10458-022-09577-3	https://link.springer.com/article/10.1007/s10458-022-09577-3	include		exclude	yes
Rong, Yao; Leemann, Tobias; Nguyen, Thai-Trang; Fiedler, Lisa; Qian, Peizhu; Unhelkar, Vaibhav; Seidel, Tina; Kasneci, Gjergji; Kasneci, Enkelejda	Towards Human-Centered Explainable AI: A Survey of User Studies for Model Explanations	10.1109/TPAMI.2023.3331846	https://ieeexplore.ieee.org/abstract/document/10316181	exclude			yes
Dexe, Jacob, Franke, Ulrik, Nöu, Anneli Avatare, Rad, Alexander	Towards Increased Transparency with Value Sensitive Design	10.1007/978-3-030-50334-5_1	https://link.springer.com/chapter/10.1007/978-3-030-50334-5_1	exclude			yes
Fanizzi, Nicola; d’Amato, Claudia	Towards Interpretable Probabilistic Classification Models for Knowledge Graphs	10.1109/SITIS57111.2022.00013	https://ieeexplore.ieee.org/abstract/document/10090018	exclude			yes
Suh, Jangwon; Kim, Jimyeong; Kwon, Soonil; Jung, Euna; Ahn, Hyo-Jeong; Lee, Kyung-Yeon; Choi, Eue-Keun; Rhee, Wonjong	Visual interpretation of deep learning model in ECG classification: A comprehensive evaluation of feature attribution methods	https://doi.org/10.1016/j.compbiomed.2024.109088	https://www.sciencedirect.com/science/article/pii/S0010482524011739	include		include	yes	yes	healthcare	image data	LIME	guided Grad CAM	domain experts	3
Szczuka, Jessica M.; Horstmann, Aike C.; Szymczyk, Natalia; Strathmann, Clara; Artelt, André; Mavrina, Lina; Krämer, Nicole	Let Me Explain What I Did or What I Would Have Done: An Empirical Study on the Effects of Explanations and Person-Likeness on Trust in and Understanding of Algorithms	10.1145/3679318.3685351	https://doi.org/10.1145/3679318.3685351	include		include		yes	recommender systems	tabular data	factual	Counterfactual	lay users	762																			**+					*+
Szczuka, Jessica M.; Horstmann, Aike C.; Szymczyk, Natalia; Strathmann, Clara; Artelt, André; Mavrina, Lina; Krämer, Nicole	Let Me Explain What I Did or What I Would Have Done: An Empirical Study on the Effects of Explanations and Person-Likeness on Trust in and Understanding of Algorithms	10.1145/3679318.3685351	https://doi.org/10.1145/3679318.3685351	include		include	yes	yes	recommender systems	tabular data	no explanation	factual OR counterfactual	lay users	762																			***+										***+
Tambwekar, Pradyumna; Gombolay, Matthew	Towards reconciling usability and usefulness of policy explanations for sequential decision-making systems.	10.3389/frobt.2024.1375490	https://www.frontiersin.org/journals/robotics-and-ai/articles/10.3389/frobt.2024.1375490/full	include		include	yes	yes	"highway domain"	image/ time series data	global text form	decision tree	lay users	231
Tambwekar, Pradyumna; Gombolay, Matthew	Towards reconciling usability and usefulness of policy explanations for sequential decision-making systems.	10.3389/frobt.2024.1375490	https://www.frontiersin.org/journals/robotics-and-ai/articles/10.3389/frobt.2024.1375490/full	include		include		yes	"highway domain"	image/ time series data	global text modified	decision tree	lay users	231
Maree, Charl; Modal, Jan Erik; Omlin, Christian W.	Towards Responsible AI for Financial Transactions	10.1109/SSCI47803.2020.9308456	https://ieeexplore.ieee.org/abstract/document/9308456	exclude	no user study		yes
Carraro, A.; Saurio, G.; Marinello, F.	Towards rigorous dataset quality standards for deep learning tasks in precision agriculture: A case study exploration	https://doi.org/10.1016/j.atech.2024.100721	https://www.sciencedirect.com/science/article/pii/S2772375524003253	exclude			yes
Schuller, Björn W.; Virtanen, Tuomas; Riveiro, Maria; Rizos, Georgios; Han, Jing; Mesaros, Annamaria; Drossos, Konstantinos	Towards Sonification in Multimodal and User-friendlyExplainable Artificial Intelligence	10.1145/3462244.3479879	https://doi.org/10.1145/3462244.3479879	include		exclude	yes
Liang, Zhiping, Sha, Lele, Tsai, Yi-Shan, Gašević, Dragan, Chen, Guanliang	Towards the Automated Generation of Readily Applicable Personalised Feedback in Education	10.1007/978-3-031-64299-9_6	https://link.springer.com/chapter/10.1007/978-3-031-64299-9_6	include		exclude	yes
Duan, Xiaojing, Pei, Bo, Ambrose, G. Alex, Hershkovitz, Arnon, Cheng, Ying, Wang, Chaoli	Towards transparent and trustworthy prediction of student learning achievement by including instructors as co-designers: a case study	10.1007/s10639-023-11954-8	https://link.springer.com/article/10.1007/s10639-023-11954-8	include		exclude	yes
Tambwekar, Pradyumna; Gombolay, Matthew	Towards reconciling usability and usefulness of policy explanations for sequential decision-making systems.	10.3389/frobt.2024.1375490	https://www.frontiersin.org/journals/robotics-and-ai/articles/10.3389/frobt.2024.1375490/full	include		include		yes	"highway domain"	image/ time series data	pseudo code	decision tree	lay users	231
Lanvin, Maxime; Gimenez, Pierre-François; Han, Yufei; Majorczyk, Frédéric; Mé, Ludovic; Totel, Eric	Towards Understanding Alerts raised by Unsupervised Network Intrusion Detection Systems	10.1145/3607199.3607247	https://doi.org/10.1145/3607199.3607247	exclude			yes
Eriksson, Håkon Svee; Grov, Gudmund	Towards XAI in the SOC – a user centric study of explainable alerts with SHAP and LIME	10.1109/BigData55660.2022.10020248	https://ieeexplore.ieee.org/abstract/document/10020248?casa_token=wRHOrYYF6EoAAAAA:VbM_qOPy1EDO9MAdoxPKPAzOThZZ3d3r_Y6Fx2rAdpawr-fu6p5DBfzEgoMAizJFUUzw-F_FUtE	include		exclude	yes		cyber security	tabular data	no explanation	SHAP	domain experts	10
Kasabov, Nikola K.; Tan, Yongyao; Doborjeh, Maryam; Tu, Enmei; Yang, Jie; Goh, Wilson; Lee, Jimmy	Transfer Learning of Fuzzy Spatio-Temporal Rules in a Brain-Inspired Spiking Neural Network Architecture: A Case Study on Spatio-Temporal Brain Data	10.1109/TFUZZ.2023.3292802	https://ieeexplore.ieee.org/abstract/document/10175605?casa_token=DPgmBjsqOYYAAAAA:YvXof3Z8v-cz-YWpl3ZtXN-e1xF7KsBoIDuJBjoD6duDG3euf5_xszuHwLy0z0YVetPpis2n4Q	exclude			yes
Novak, Jasminko, Maljur, Tina, Drenska, Kalina	Transferring AI Explainability to User-Centered Explanations of Complex COVID-19 Information	10.1007/978-3-031-21707-4_31	https://link.springer.com/chapter/10.1007/978-3-031-21707-4_31	include		exclude	yes
Parziale, Marc, Lomazzi, Luca, Giglio, Marco, Cadini, Francesco	Transmissibility Functions-Based Structural Damage Assessment with the Use of Explainable Convolutional Neural Networks	10.1007/978-3-031-39117-0_55	https://link.springer.com/chapter/10.1007/978-3-031-39117-0_55	exclude			yes
Balasubramaniam, Nagadivya; Kauppinen, Marjo; Rannisto, Antti; Hiekkanen, Kari; Kujala, Sari	Transparency and explainability of AI systems: From ethical guidelines to requirements	https://doi.org/10.1016/j.infsof.2023.107197	https://www.sciencedirect.com/science/article/pii/S0950584923000514	include		exclude	yes
Deokar, Ruchira; Nanjundan, Preethi; Mohanty, Sachi Nandan	Transparency in Translation: A Deep Dive into Explainable AI Techniques for Bias Mitigation	10.1109/APCIT62007.2024.10673712	https://ieeexplore.ieee.org/abstract/document/10673712?casa_token=OnmAlxElGzgAAAAA:rvol4D2xZwlyPjrOe2tabA2m6udeW1fuJ3SYFYKjbd9MOgXvrU96wIgOLI7d9jrP5ltVmbm7Vg	exclude	no user study		yes
Yuan, Yue; Chaffart, Donovan; Wu, Tao; Zhu, Jesse	Transparency: The Missing Link to Boosting AI Transformations in Chemical Engineering	https://doi.org/10.1016/j.eng.2023.11.024	https://www.sciencedirect.com/science/article/pii/S2095809924002376	exclude	review on ai in chemical engineering		yes
Biedma-Rdguez, Carmen, Gacto, María José, Anguita-Ruiz, Augusto, Alcalá-Fdez, Jesús, Alcalá, Rafael	Transparent but Accurate Evolutionary Regression Combining New Linguistic Fuzzy Grammar and a Novel Interpretable Linear Extension	10.1007/s40815-022-01324-w	https://link.springer.com/article/10.1007/s40815-022-01324-w	include		exclude	yes
Zolanvari, Maede; Yang, Zebo; Khan, Khaled; Jain, Raj; Meskin, Nader	TRUST XAI: Model-Agnostic Explanations for AI With a Case Study on IIoT Security	10.1109/JIOT.2021.3122019	https://ieeexplore.ieee.org/abstract/document/9583587?casa_token=H80BhPA1oKAAAAAA:WvrsDUvEmcD_CDzrcv8hcFLjYp7GVsjkI-_KByYdoigaPFQ4o3nixKrgZ48nHAEosRBUsLKA9Fg	exclude			yes
Garg, Sahil; Kaur, Kuljeet; Aujla, Gagangeet Singh; Kaddoum, Georges; Garigipati, Prasad; Guizani, Mohsen	Trusted Explainable AI for 6G-Enabled Edge Cloud Ecosystem	10.1109/MWC.016.220047	https://ieeexplore.ieee.org/abstract/document/10183810	exclude			yes
Rind, Alexander; Slijepčević, Djordje; Zeppelzauer, Matthias; Unglaube, Fabian; Kranzl, Andreas; Horsak, Brian	Trustworthy Visual Analytics in Clinical Gait Analysis: A Case Study for Patients with Cerebral Palsy	10.1109/TREX57753.2022.00006	https://ieeexplore.ieee.org/abstract/document/9974462?casa_token=0Dds7KPqRgMAAAAA:AeuOzrcUfDU70ChJV8Nvdcb7B1aHPCU9cEjWN0xstMTzHnOQsRn7SFU4uob5tX4RJMv3UIoMFQ	include		exclude	yes
Aly, Mohammed; Ghallab, Abdullatif; Fathi, Islam S.	Tumor ViT-GRU-XAI: Advanced Brain Tumor Diagnosis Framework: Vision Transformer and GRU Integration for Improved MRI Analysis: A Case Study of Egypt	10.1109/ACCESS.2024.3513235	https://ieeexplore.ieee.org/abstract/document/10781413	exclude			yes
Del Castillo Torres, Guillermo; Roig-Maimó, Maria Francesca; Mascaró-Oliver, Miquel; Amengual-Alcover, Esperança; Mas-Sansó, Ramon	Understanding How CNNs Recognize Facial Expressions: A Case Study with LIME and CEM.	10.3390/s23010131	https://www.mdpi.com/1424-8220/23/1/131	exclude	no user study		yes
Tambwekar, Pradyumna; Gombolay, Matthew	Towards reconciling usability and usefulness of policy explanations for sequential decision-making systems.	10.3389/frobt.2024.1375490	https://www.frontiersin.org/journals/robotics-and-ai/articles/10.3389/frobt.2024.1375490/full	include		include		yes	"highway domain"	image/ time series data	global text form	pseudo code	lay users	231
Tambwekar, Pradyumna; Gombolay, Matthew	Towards reconciling usability and usefulness of policy explanations for sequential decision-making systems.	10.3389/frobt.2024.1375490	https://www.frontiersin.org/journals/robotics-and-ai/articles/10.3389/frobt.2024.1375490/full	include		include		yes	"highway domain"	image/ time series data	global text modified	pseudo code	lay users	231
Tsai et al	Exploring and Promoting Diagnostic Transparency and Explainability in Online Symptom Checkers	10.1145/3411764.3445101	https://dl.acm.org/doi/10.1145/3411764.3445101	include	From Backward referencing	include		yes	healthcare	tabular data	no explanation	Example-based	lay users	20										**+														***+				*+
Tsai et al	Exploring and Promoting Diagnostic Transparency and Explainability in Online Symptom Checkers	10.1145/3411764.3445101	https://dl.acm.org/doi/10.1145/3411764.3445101	include	From Backward referencing	include	yes	yes	healthcare	tabular data	no explanation	feature importance	lay users	20										**+														***+				*+
VanNostrand, Peter M.; Hofmann, Dennis M.; Ma, Lei; Rundensteiner, Elke A.	Actionable Recourse for Automated Decisions: Examining the Effects of Counterfactual Explanation Type and Presentation on Lay User Understanding	10.1145/3630106.3658997	https://doi.org/10.1145/3630106.3658997	include		include		yes	loan application	tabular data	instance counterfactual NLP	instance counterfactual visual	lay users	252																													*+
VanNostrand, Peter M.; Hofmann, Dennis M.; Ma, Lei; Rundensteiner, Elke A.	Actionable Recourse for Automated Decisions: Examining the Effects of Counterfactual Explanation Type and Presentation on Lay User Understanding	10.1145/3630106.3658997	https://doi.org/10.1145/3630106.3658997	include		include		yes	loan application	tabular data	instance counterfactual	region counterfactual	lay users	252										*+									min *+			*+							min *+
VanNostrand, Peter M.; Hofmann, Dennis M.; Ma, Lei; Rundensteiner, Elke A.	Actionable Recourse for Automated Decisions: Examining the Effects of Counterfactual Explanation Type and Presentation on Lay User Understanding	10.1145/3630106.3658997	https://doi.org/10.1145/3630106.3658997	include		include	yes	yes	loan application	tabular data	natural language	visual presentation	lay users	252
Heimerl, Alexander; Weitz, Katharina; Baur, Tobias; André, Elisabeth	Unraveling ML Models of Emotion With NOVA: Multi-Level Explainable AI for Non-Experts	10.1109/TAFFC.2020.3043603	https://ieeexplore.ieee.org/abstract/document/9288932	include		exclude	yes
Yuan, Yuanyuan; Pang, Qi; Wang, Shuai	Unveiling Hidden DNN Defects with Decision-Based Metamorphic Testing	10.1145/3551349.3561157	https://doi.org/10.1145/3551349.3561157	exclude			yes
Gaya-Morey, F. Xavier, Ramis-Guarinos, Silvia, Manresa-Yee, Cristina, Buades-Rubio, José M.	Unveiling the human-like similarities of automatic facial expression recognition: An empirical exploration through explainable ai	10.1007/s11042-024-20090-5	https://link.springer.com/article/10.1007/s11042-024-20090-5	exclude			yes
Liu, Yuan; Wang, Hongfa; Guan, Xinjian; Meng, Yu; Xu, Hongshi	Urban Flood Depth Prediction and Visualization Based on the XGBoost-SHAP Model	10.1007/s11269-024-04020-6	https://link.springer.com/10.1007/s11269-024-04020-6	exclude			yes
Hosseiny, Benyamin; Abdi, Abdulhakim M.; Jamali, Sadegh	Urban land use and land cover classification with interpretable machine learning – A case study using Sentinel-2 and auxiliary data	https://doi.org/10.1016/j.rsase.2022.100843	https://www.sciencedirect.com/science/article/pii/S2352938522001513	exclude			yes
Nimmo, Robert; Constantinides, Marios; Zhou, Ke; Quercia, Daniele; Stumpf, Simone	User Characteristics in Explainable AI: The Rabbit Hole of Personalization?	10.1145/3613904.3642352	https://doi.org/10.1145/3613904.3642352	include		exclude	yes
Halliwell, Nicholas; Gandon, Fabien; Lecue, Freddy	User Scored Evaluation of Non-Unique Explanations for Relational Graph Convolutional Network Link Prediction on Knowledge Graphs	10.1145/3460210.3493557	https://doi.org/10.1145/3460210.3493557	include		exclude	yes
Zylowski, Thorsten; Sautchuk-Patricio, Nathalia; Hettmann, Wladimir; Anderer, Katharina; Fischer, Karl; Wölfel, Matthias; Henning, Peter	User Study on the Trustworthiness, Usability and Explainability of Intent-based and Large Language Model-based Career Planning Conversational Agents	10.1145/3702163.3702409	https://doi.org/10.1145/3702163.3702409	include		exclude	yes
Waa, Jasper van der; Nieuwburg, Elisabeth; Cremers, Anita; Neerincx, Mark	Evaluating XAI: A comparison of rule-based and example-based explanations	https://doi.org/10.1016/j.artint.2020.103404	https://www.sciencedirect.com/science/article/pii/S0004370220301533	include		include		yes	healthcare	tabular data	no explanation	example-based	lay users	45		***+
Waa, Jasper van der; Nieuwburg, Elisabeth; Cremers, Anita; Neerincx, Mark	Evaluating XAI: A comparison of rule-based and example-based explanations	https://doi.org/10.1016/j.artint.2020.103404	https://www.sciencedirect.com/science/article/pii/S0004370220301533	include		include	yes	yes	healthcare	tabular data	no explanation	rule-based	lay users	45		*+																											**+
Wang, Ping; Ding, Heng	The rationality of explanation or human capacity? Understanding the impact of explainable artificial intelligence on human-AI trust and decision performance	https://doi.org/10.1016/j.ipm.2024.103732	https://www.sciencedirect.com/science/article/pii/S030645732400092X	include		include	yes	yes	e-commerce/ sales	tabular data	no explanation	SHAP	domain experts	69		**+							**+
Warren, Greta; Byrne, Ruth M. J.; Keane, Mark T.	Categorical and Continuous Features in Counterfactual Explanations of AI Systems	10.1145/3673907	https://doi.org/10.1145/3673907	include		include		yes	BAC prediciton	tabular data	causal explanation	counterfactual	lay users	127										***+
Branley-Bell, Dawn, Whitworth, Rebecca, Coventry, Lynne	User Trust and Understanding of Explainable AI: Exploring Algorithm Visualisations and User Biases	10.1007/978-3-030-49065-2_27	https://link.springer.com/chapter/10.1007/978-3-030-49065-2_27	include		exclude	yes
Deo, Sahil, Sontakke, Neha	User-Centric Explainability in Fintech Applications	10.1007/978-3-030-78642-7_64	https://link.springer.com/chapter/10.1007/978-3-030-78642-7_64	include	no significances	exclude	yes
Donna Sheperis, Shiri Sadeh-Sharvit	Using AI-Supported Supervision in a University Telemental Health Training Clinic	10.61888/2692-4129.1093	http://digital.sandiego.edu/tces/vol4/iss1/3	exclude			yes
Sousa Silveira, Thiago, Uszkoreit, Hans, Ai, Renlong	Using Aspect-Based Analysis for Explainable Sentiment Predictions	10.1007/978-3-030-32236-6_56	https://link.springer.com/chapter/10.1007/978-3-030-32236-6_56	exclude			yes
Dubey, Snigdha; Tiwari, Gaurav; Singh, Sneha; Goldberg, Saveli; Pinsky, Eugene	Using machine learning for healthcare treatment planning.	10.3389/frai.2023.1124182	https://www.frontiersin.org/journals/artificial-intelligence/articles/10.3389/frai.2023.1124182/full	exclude			yes
Warren, Greta; Byrne, Ruth M. J.; Keane, Mark T.	Categorical and Continuous Features in Counterfactual Explanations of AI Systems	10.1145/3673907	https://doi.org/10.1145/3673907	include		include	yes	yes	BAC prediciton	tabular data	no explanation	counterfactual	lay users	127
Hamilton, Robert I.; Papadopoulos, Panagiotis N.	Using SHAP Values and Machine Learning to Understand Trends in the Transient Stability Limit	10.1109/TPWRS.2023.3248941	https://ieeexplore.ieee.org/abstract/document/10052755?casa_token=GF2miN6Car0AAAAA:gCqdWKkRCk73sA6ALdI5oqYDsevGJHeuD86qs9qE84FnRPRyQk35JmO3ZQr2CW6nEYxjZz1LOg	exclude			yes
Tang, Hui; Yu, Xiangtian; Liu, Rui; Zeng, Tao	Vec2image: an explainable artificial intelligence model for the feature representation and classification of high-dimensional biological data by vector-to-image conversion.	10.1093/bib/bbab584	https://academic.oup.com/bib/article/23/2/bbab584/6518046?login=false	include		exclude	yes
Zhou, Guoyang; Aggarwal, Vaneet; Yin, Ming; Yu, Denny	Video-based AI Decision Support System for Lifting Risk Assessment	10.1109/SMC52423.2021.9659025	https://ieeexplore.ieee.org/abstract/document/9659025?casa_token=kUEq8qB2OyMAAAAA:M9bxuyoGwxtZmI5z794vMxCaR4pbQszjmmYiSBFJpuGdBtzOA1ZdTh8kTYNmk0TIqfOWtR27NLg	include		exclude	yes
Sawada, Shoko; Suzuki, Tomoyuki; Yamaguchi, Kota; Toyoda, Masashi	Visual Explanation for Advertising Creative Workflow	10.1145/3613905.3651123	https://doi.org/10.1145/3613905.3651123	exclude			yes
Weitz, Katharina, Schiller, Dominik, Schlagowski, Ruben, Huber, Tobias, André, Elisabeth	“Let me explain!”: exploring the potential of virtual agents in explainable AI interaction design	10.1007/s12193-020-00332-0	https://link.springer.com/article/10.1007/s12193-020-00332-0	include		include		yes	speech recognition	image data (generated from voice data=	LIME	LIME + spoken information	domain experts	30										**+
Sasaki, Y.; Watanabe, R.; Shimizu, T.; Hasegawa, Y.; Saitoh, F.	Visualization of Evaluation Viewpoints in Similar Customers by XAI Based on Review Evaluation Scores	10.1109/IEEM58616.2023.10406493	https://ieeexplore.ieee.org/abstract/document/10406493?casa_token=-D_lVzT9J-YAAAAA:6Qytosw867EPY0Utb2OlrblbXMF47__Oc14vFhNec8dUp4s7zrLshw_4hJ759rzpoMiYtygzuA	exclude			yes
Mahdavifar, Samaneh, Saqib, Mohd, Fung, Benjamin C. M., Charland, Philippe, Walenstein, Andrew	VulEXplaineR: XAI for Vulnerability Detection on Assembly Code	10.1007/978-3-031-70378-2_1	https://link.springer.com/chapter/10.1007/978-3-031-70378-2_1	include		exclude	yes
Li, Yi; Wang, Shaohua; Nguyen, Tien N.	Vulnerability detection with fine-grained interpretations	10.1145/3468264.3468597	https://doi.org/10.1145/3468264.3468597	exclude			yes
Weitz, Katharina, Schiller, Dominik, Schlagowski, Ruben, Huber, Tobias, André, Elisabeth	“Let me explain!”: exploring the potential of virtual agents in explainable AI interaction design	10.1007/s12193-020-00332-0	https://link.springer.com/article/10.1007/s12193-020-00332-0	include		include		yes	speech recognition	image data (generated from voice data=	LIME	LIME + spoken information + agent visualisation	domain experts	30										**+
Pei, Yan; Xu, Jiahui; Yu, Feng; Zhang, Lisan; Luo, Wei	WaveSleepNet: An Interpretable Network for Expert-like Sleep Staging	10.1109/JBHI.2024.3498871	https://pubmed.ncbi.nlm.nih.gov/34052291/	exclude			yes
Danry, Valdemar; Pataranutaporn, Pat; Mao, Yaoli; Maes, Pattie	Wearable Reasoner: Towards Enhanced Human Rationality Through A Wearable Device With An Explainable AI Assistant	10.1145/3384657.3384799	https://doi.org/10.1145/3384657.3384799	include		exclude	yes
Höhn, Sviatlana, Faradouris, Niko	What Does It Cost to Deploy an XAI System: A Case Study in Legacy Systems	10.1007/978-3-030-82017-6_11	https://link.springer.com/chapter/10.1007/978-3-030-82017-6_11	exclude			yes
Schmid, Ute, Wrede, Britta	What is Missing in XAI So Far?	10.1007/s13218-022-00786-2	https://link.springer.com/article/10.1007/s13218-022-00786-2	exclude			yes
Kerzel, Matthias, Ambsdorf, Jakob, Becker, Dennis, Lu, Wenhao, Strahl, Erik, Spisak, Josua, Gäde, Connor, Weber, Tom, Wermter, Stefan	What’s on Your Mind, NICO?	10.1007/s13218-022-00772-8	https://link.springer.com/article/10.1007/s13218-022-00772-8	exclude			yes
Wachowiak, Lennart; Fenn, Andrew; Kamran, Haris; Coles, Andrew; Celiktutan, Oya; Canal, Gerard	When Do People Want an Explanation from a Robot?	10.1145/3610977.3634990	https://dl.acm.org/doi/abs/10.1145/3610977.3634990	include		exclude	yes
Henckaerts, Roel; Antonio, Katrien; Côté, Marie-Pier	When stakes are high: Balancing accuracy and transparency with Model-Agnostic Interpretable Data-driven suRRogates	https://doi.org/10.1016/j.eswa.2022.117230	https://www.sciencedirect.com/science/article/pii/S0957417422006042	exclude			yes
Udoidiok, Ifiok; Zhang, Jielun	When XAI Meets CAPTCHA: A Case Study	10.1109/CARS61786.2024.10778641	https://ieeexplore.ieee.org/abstract/document/10778641	exclude			yes
Chen, Shan; Ke, Shengjie; Han, Shuihua; Gupta, Shivam; Sivarajah, Uthayasankar	Which product description phrases affect sales forecasting? An explainable AI framework by integrating WaveNet neural network models with multiple regression	https://doi.org/10.1016/j.dss.2023.114065	https://www.sciencedirect.com/science/article/pii/S0167923623001409	exclude			yes
Shang, Ruoxi; Feng, K. J. Kevin; Shah, Chirag	Why Am I Not Seeing It? Understanding Users’ Needs for Counterfactual Explanations in Everyday Recommendations	10.1145/3531146.3533189	https://doi.org/10.1145/3531146.3533189	include		exclude	yes
Eder, Matthias; Steinbauer-Wagner, Gerald	Why Did My Robot Choose This Path? Explainable Path Planning for Off-Road Navigation	10.1109/RO-MAN60168.2024.10731198	https://ieeexplore.ieee.org/abstract/document/10731198?casa_token=Vd0QWlmrxYQAAAAA:wv_7i-KfyvuaX0b0tOBvXkg0E3PHjw3RApsJ8QdRcakTROkhjOOGWyGEbCKqR3HUy49AXTAAeA	include		exclude	yes
Taschdjian, Zachary	Why Did the Robot Cross the Road?	10.1007/978-3-030-60117-1_39	https://link.springer.com/chapter/10.1007/978-3-030-60117-1_39	include	no significances	exclude	yes
Weitz, Katharina, Schiller, Dominik, Schlagowski, Ruben, Huber, Tobias, André, Elisabeth	“Let me explain!”: exploring the potential of virtual agents in explainable AI interaction design	10.1007/s12193-020-00332-0	https://link.springer.com/article/10.1007/s12193-020-00332-0	include		include	yes	yes	speech recognition	image data (generated from voice data=	LIME	LIME + textual information	domain experts	30										**+
Weitz, Katharina; Schiller, Dominik; Schlagowski, Ruben; Huber, Tobias; André, Elisabeth	"Do you trust me?": Increasing User-Trust by Integrating Virtual Agents in Explainable AI Interaction Design	10.1145/3308532.3329441	https://doi.org/10.1145/3308532.3329441	include		include	yes	yes	speech recognition	audio data	LIME	LIME + NLP Agent	lay users	30						*-	*-			**+
Wilkinson, Daricia; Alkan, Öznur; Liao, Q. Vera; Mattetti, Massimiliano; Vejsbjerg, Inge; Knijnenburg, Bart P.; Daly, Elizabeth	Why or Why Not? The Effect of Justification Styles on Chatbot Recommendations	10.1145/3441715	https://doi.org/10.1145/3441715	include		include	yes	yes	recommender systems (movies)	tabular	no explanation	why justification	lay users	310																								*+
Wilkinson, Daricia; Alkan, Öznur; Liao, Q. Vera; Mattetti, Massimiliano; Vejsbjerg, Inge; Knijnenburg, Bart P.; Daly, Elizabeth	Why or Why Not? The Effect of Justification Styles on Chatbot Recommendations	10.1145/3441715	https://doi.org/10.1145/3441715	include		include		yes	recommender systems (movies)	tabular	no explanation	why not justification	lay users	310								*-
Zhang, Yunfeng; Liao, Q. Vera; Bellamy, Rachel K. E.	Effect of confidence and explanation on accuracy and trust calibration in AI-assisted decision making	10.1145/3351095.3372852	https://doi.org/10.1145/3351095.3372852	include		include		yes	income prediction	tabular data	SHAP	confidence score	lay users	72		***+
Sharma, Rahul, Kaushik, Minakshi, Peious, Sijo Arakkal, Shahin, Mahtab, Vidyarthi, Ankit, Tiwari, Prayag, Draheim, Dirk	Why Not to Trust Big Data: Discussing Statistical Paradoxes	10.1007/978-3-031-11217-1_4	https://link.springer.com/chapter/10.1007/978-3-031-11217-1_4	exclude			yes
Zhang, Yunfeng; Liao, Q. Vera; Bellamy, Rachel K. E.	Effect of confidence and explanation on accuracy and trust calibration in AI-assisted decision making	10.1145/3351095.3372852	https://doi.org/10.1145/3351095.3372852	include		include	yes	yes	income prediction	tabular data	no explanation	confidence score	lay users	72		*+	***+
Zhong, Qiaoting; Fan, Xiuyi; Luo, Xudong; Toni, Francesca	An explainable multi-attribute decision model based on argumentation	https://doi.org/10.1016/j.eswa.2018.09.038	https://www.sciencedirect.com/science/article/pii/S0957417418306158	include		include	yes	yes	law	tabular data?	dispute tree (model-specific XAI)	dispute tree + NLP	domain experts	33
Abouhassan, Iman; Kasabov, Nikola; Popov, George; Trifonov, Roumen	Why Use Evolving Neuro-Fuzzy and Spiking Neural Networks for incremental and explainable learning of time series? A case study on predictive modelling of trade imports and outlier detection	10.1109/IS57118.2022.10019673	https://ieeexplore.ieee.org/abstract/document/10019673?casa_token=Q7JJogf_V08AAAAA:vhf8rDGJKC1mJbgOCDSCOSl7XK29xmrCQrR_-6Eqkn-dql9tBt_T4WAHq2rrMepuyRtbWjufNQ	exclude	no user study		yes
Liebherr, M.; Gößwein, E.; Kannen, C.; Babiker, A.; Al-Shakhsi, S.; Staab, V.; Li, B. J.; Ali, R.; Montag, C.	Working Memory and the Need for Explainable AI – Scenarios from Healthcare, Social Media and Insurance	https://doi.org/10.1016/j.heliyon.2025.e41871	https://www.sciencedirect.com/science/article/pii/S2405844025002518	include		exclude	yes
Janice C. Sipior, Mary Granger, Ali Farhoomand	Writing a Teaching Case and Teaching Note: A Reference Guide	10.17705/1cais.04935	http://aisel.aisnet.org/cais/vol49/iss1/35	exclude			yes
Younus, Arjumand, Qureshi, M. Atif, Jeon, Mingyeong, Kazemi, Arefeh, Caton, Simon	XAI Analysis of Online Activism to Capture Integration in Irish Society Through Twitter	10.1007/978-3-031-19097-1_14	https://link.springer.com/chapter/10.1007/978-3-031-19097-1_14	exclude			yes
Hariharan, Swetha, Rejimol Robinson, R. R., Prasad, Rendhir R., Thomas, Ciza, Balakrishnan, N.	XAI for intrusion detection system: comparing explanations based on global and local scope	10.1007/s11416-022-00441-2	https://link.springer.com/article/10.1007/s11416-022-00441-2	exclude			yes
Håvardstun, Brigt, Ferri, Cèsar, Flikka, Kristian, Telle, Jan Arne	XAI for Time Series Classification: Evaluating the Benefits of Model Inspection for End-Users	10.1007/978-3-031-63800-8_22	https://link.springer.com/chapter/10.1007/978-3-031-63800-8_22	include		exclude	yes
Baum, Deborah, Baum, Kevin, Gros, Timo P., Wolf, Verena	XAI Requirements in Smart Production Processes: A Case Study	10.1007/978-3-031-44064-9_1	https://link.springer.com/chapter/10.1007/978-3-031-44064-9_1	exclude			yes
Hostetter, John Wesley; Conati, Cristina; Yang, Xi; Abdelshiheed, Mark; Barnes, Tiffany; Chi, Min	XAI to Increase the Effectiveness of an Intelligent Pedagogical Agent	10.1145/3570945.3607301	https://doi.org/10.1145/3570945.3607301	include		exclude	yes
Maltbie, Nicholas; Niu, Nan; Van Doren, Matthew; Johnson, Reese	XAI tools in the public sector: a case study on predicting combined sewer overflows	10.1145/3468264.3468547	https://doi.org/10.1145/3468264.3468547	include		exclude	yes
Raab, Dominik, Theissler, Andreas, Spiliopoulou, Myra	XAI4EEG: spectral and spatio-temporal explanation of deep learning-based seizure detection in EEG time series	10.1007/s00521-022-07809-x	https://link.springer.com/article/10.1007/s00521-022-07809-x	include		exclude	yes	yes	healthcare	EEG (time series)	SHAP 1d and 3d	XAI4EEG	lay users	28
Rivera, A. J.; Muñoz, J. Cobo; Pérez-Goody, M. D.; de San Pedro, B. Sáenz; Charte, F.; Elizondo, D.; Rodríguez, C.; Abolafia, M. L.; Perea, A.; Del Jesus, M. J.	XAIRE: An ensemble-based methodology for determining the relative importance of variables in regression tasks. Application to a hospital emergency department.	10.1016/j.artmed.2023.102494	https://www.sciencedirect.com/science/article/pii/S0933365723000088	exclude			yes
Zöller, Marc-André; Titov, Waldemar; Schlegel, Thomas; Huber, Marco F.	XAutoML: A Visual Analytics Tool for Understanding and Validating Automated Machine Learning	10.1145/3625240	https://doi.org/10.1145/3625240	include		exclude	yes
Smirnova, Alisa; Yang, Jie; Cudre-Mauroux, Philippe	XCrowd: Combining Explainability and Crowdsourcing to Diagnose Models in Relation Extraction	10.1145/3627673.3679777	https://doi.org/10.1145/3627673.3679777	exclude			yes
Cruz-Filipe, Luís, Kostopoulou, Sofia, Montesi, Fabrizio, Vistrup, Jonas	XL: Explainable Lead Generation with Microservices and Hypothetical Answers	10.1007/978-3-031-46235-1_1	https://link.springer.com/chapter/10.1007/978-3-031-46235-1_1	include		exclude	yes
Javed, Abqa; Shoaib, Muhammad; Jaleel, Abdul	X-OODM: Explainable Object-Oriented Design Methodology	10.1109/ACCESS.2024.3477553	https://ieeexplore.ieee.org/abstract/document/10713364	exclude	no user study		yes
Ahn, Geonhee; Haque, Md Mahim Anjum; Hazarika, Subhashis; Kim, Soo Kyung	XplainScreen: Unveiling the Black Box of Graph Neural Network Drug Screening Models with a Unified XAI Framework	10.1145/3627673.3679236	https://doi.org/10.1145/3627673.3679236	exclude			yes
Polley, Sayantan; Mondal, Subhajit; Mannam, Venkata Srinath; Kumar, Kushagra; Patra, Subhankar; Nürnberger, Andreas	X-Vision: Explainable Image Retrieval by Re-Ranking in Semantic Space	10.1145/3511808.3557187	https://doi.org/10.1145/3511808.3557187	include		exclude	yes
Zhang, Zelun Tony; Buchner, Felicitas; Liu, Yuanting; Butz, Andreas	You Can Only Verify When You Know the Answer: Feature-Based Explanations Reduce Overreliance on AI for Easy Decisions, but Not for Hard Ones	10.1145/3670653.3670660	https://doi.org/10.1145/3670653.3670660	include		exclude	yes
Bi, Nanyi; Huang, Yi-Ching (Janet); Han, Chao-Chun; Hsu, Jane Yung-jen	You Know What I Meme: Enhancing People's Understanding and Awareness of Hateful Memes Using Crowdsourced Explanations	10.1145/3579593	https://doi.org/10.1145/3579593	include		exclude	yes
												p<0.05 -> *
												p<0.01 -> **
												p<0.001 -> ***
[truncated: 45 more columns]
